# Supplementary material for: Modeling expression ranks for noise-tolerant differential expression analysis of scRNA-seq data
Source: HighWire-hosted journal article supplement (doi:10.1101/gr.267070.120), 2021-03-05
Supplement: Supplemental_Figure_S1.pdf [file Supplemental_Figure_S1.pdf]

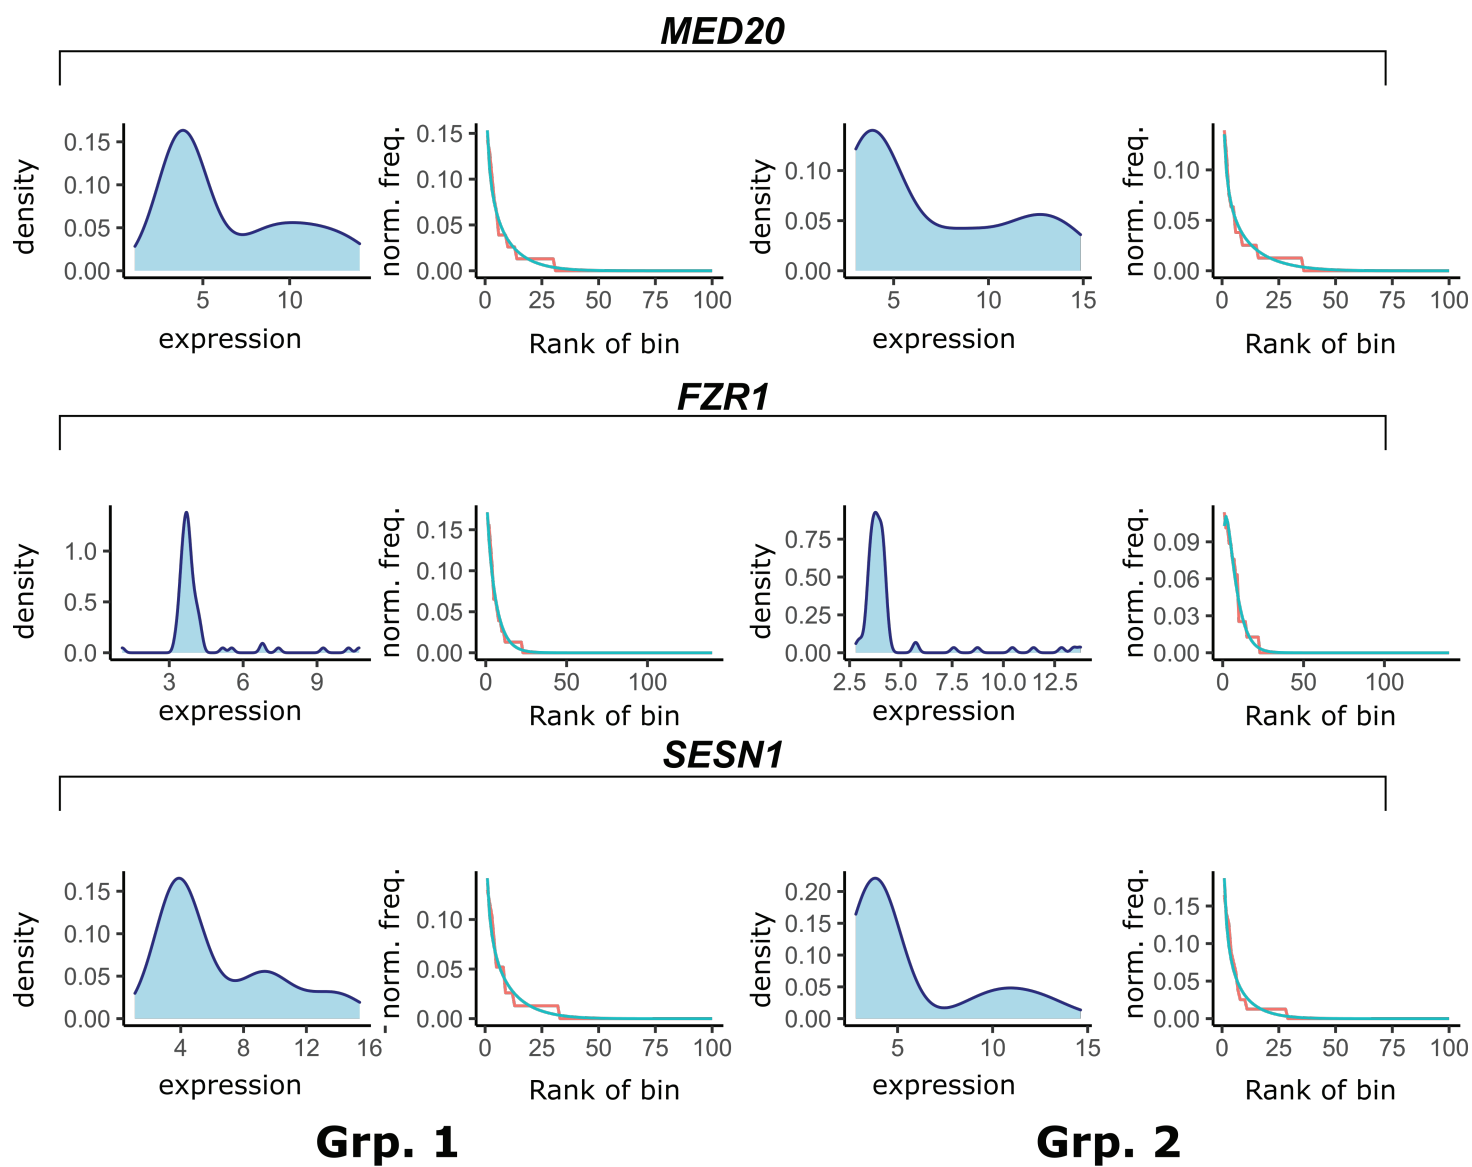

**Supplemental Figure S1.** Five randomly selected non-differential genes between myoblasts sampled before/24 hours after differentiation (Source: Trapnell data). Differential expression analysis was performed using ROSeq. Each row contains cell-group-wise expression density plot as well as a plot depicting DGBD based modeling of rank-ordered expression bins.
