# Supplementary material for: Modeling expression ranks for noise-tolerant differential expression analysis of scRNA-seq data
Source: HighWire-hosted journal article supplement (doi:10.1101/gr.267070.120), 2021-03-05
Supplement: Supplemental_Figure_S3.pdf [file Supplemental_Figure_S3.pdf]

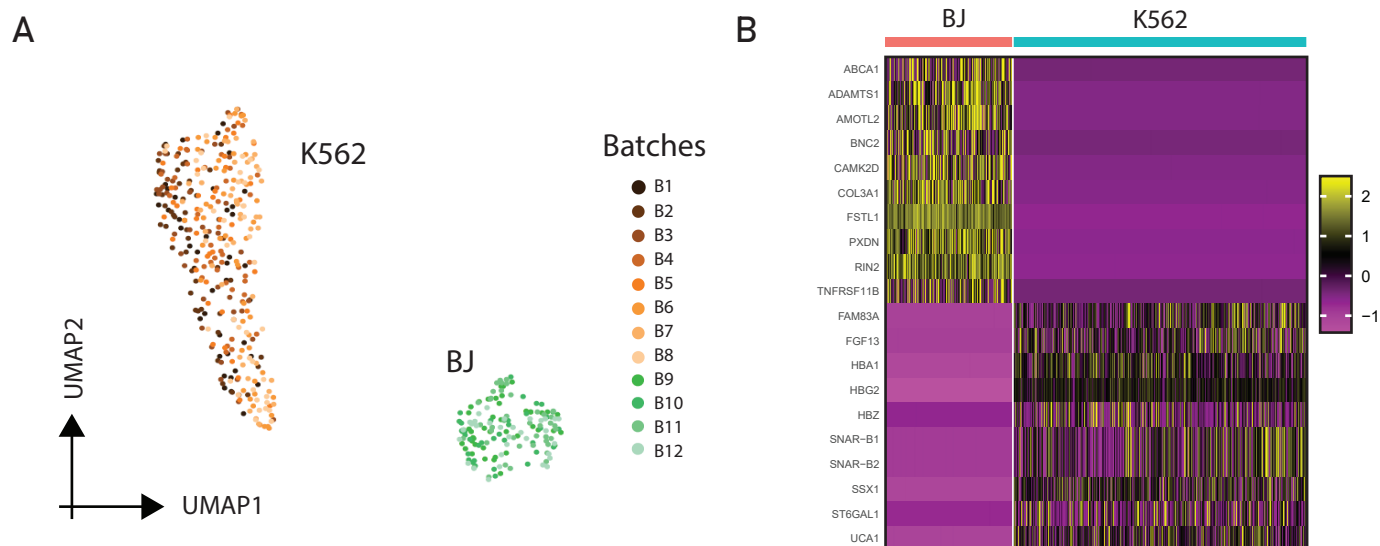

**Supplemental Figure S3.** (A) Standard Seurat pipeline (without batch correction) was used for UMAP based visualization of the single cells, color-coded by batch information. Even in the absence of batch correction, the cells look segregated by their respective types (brown dots represent K562 cells, whereas green dots represent BJ fibroblasts). (B) Heatmap showing top differentially expressed genes including known cell type markers such as FAM83A (found highly expressed in K562 cells), and COL3A1 (found highly expressed in BJ fibroblasts)
