# Supplementary material for: Modeling expression ranks for noise-tolerant differential expression analysis of scRNA-seq data
Source: HighWire-hosted journal article supplement (doi:10.1101/gr.267070.120), 2021-03-05
Supplement: Supplemental_Figure_S5.pdf [file Supplemental_Figure_S5.pdf]

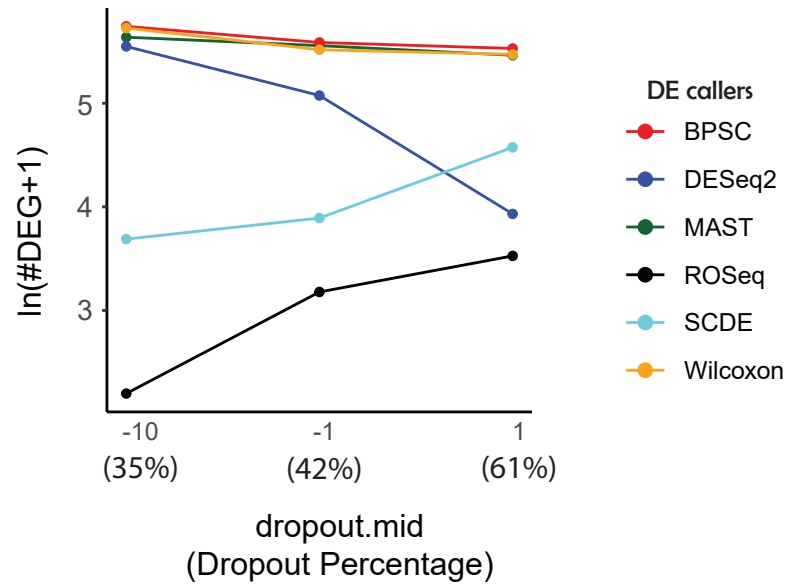

**Supplemental Figure S5.** Line chart depicting false DEG calls on null dataset created using the Splatter R package with different concentration of dropouts controlled by the custom parameter dropout.mid. Each simulated count matrix consisted of 6000 genes and 500 cells. Groups were created by randomly splitting the cells into two groups (250 cells in each group).
