# Supplementary material for: Modeling expression ranks for noise-tolerant differential expression analysis of scRNA-seq data
Source: HighWire-hosted journal article supplement (doi:10.1101/gr.267070.120), 2021-03-05
Supplement: Supplemental_Table_S1.xlsx [file Supplemental_Table_S1.xlsx]

## Sheet: BJ and K562 samples
Supplemental Table S1: Sample information for the BJ fibroblast and K562 transcriptomes
Sample name	Total read count	No. of expressed genes	Single cell/ Bulk	Batch
SVT14_1851031040_site_01_S1_BJ	584690	6679	Single	B9
SVT14_1851031040_site_02_S2_BJ	648749	5990	Single	B9
SVT14_1851031040_site_03_S3_BJ	648022	6700	Single	B9
SVT14_1851031040_site_04_S4_BJ	791530	7373	Single	B9
SVT14_1851031040_site_05_S5_BJ	755496	7025	Single	B9
SVT14_1851031040_site_06_S6_BJ	132956	7854	Single	B9
SVT14_1851031040_site_07_S13_BJ	495753	7578	Single	B9
SVT14_1851031040_site_09_S15_BJ	515780	7076	Single	B9
SVT14_1851031040_site_10_S16_BJ	770657	7611	Single	B9
SVT14_1851031040_site_11_S17_BJ	690165	8406	Single	B9
SVT14_1851031040_site_12_S18_BJ	802748	8053	Single	B9
SVT14_1851031040_site_13_S25_BJ	620035	7037	Single	B9
SVT14_1851031040_site_14_S26_BJ	520255	9379	Single	B9
SVT14_1851031040_site_15_S27_BJ	545669	8406	Single	B9
SVT14_1851031040_site_16_S28_BJ	832534	6900	Single	B9
SVT14_1851031040_site_17_S29_BJ	795119	6376	Single	B9
SVT14_1851031040_site_18_S30_BJ	518473	7061	Single	B9
SVT14_1851031040_site_19_S37_BJ	509271	7962	Single	B9
SVT14_1851031040_site_20_S38_BJ	715348	8569	Single	B9
SVT14_1851031040_site_21_S39_BJ	627051	8245	Single	B9
SVT14_1851031040_site_22_S40_BJ	662309	8267	Single	B9
SVT14_1851031040_site_23_S41_BJ	490275	7622	Single	B9
SVT14_1851031040_site_24_S42_BJ	582785	6730	Single	B9
SVT14_1851031040_site_25_S51_BJ	804045	8186	Single	B9
SVT14_1851031040_site_26_S50_BJ	877164	6066	Single	B9
SVT14_1851031040_site_28_S54_BJ	716132	7116	Single	B9
SVT14_1851031040_site_29_S53_BJ	411973	8110	Single	B9
SVT14_1851031040_site_31_S63_BJ	755308	7848	Single	B9
SVT14_1851031040_site_32_S62_BJ	795968	8557	Single	B9
SVT14_1851031040_site_33_S61_BJ	331193	8432	Single	B9
SVT14_1851031040_site_34_S66_BJ	527835	7908	Single	B9
SVT14_1851031040_site_36_S64_BJ	517712	8248	Single	B9
SVT14_1851031040_site_37_S75_BJ	601015	8361	Single	B9
SVT14_1851031040_site_38_S74_BJ	646588	7329	Single	B9
SVT14_1851031040_site_39_S73_BJ	517546	7734	Single	B9
SVT14_1851031040_site_40_S78_BJ	875242	8303	Single	B9
SVT14_1851031040_site_41_S77_BJ	1.33136e+06	8451	Single	B9
SVT14_1851031040_site_42_S76_BJ	761998	7797	Single	B9
SVT14_1851031040_site_43_S87_BJ	1.07658e+06	8708	Single	B9
SVT14_1851031040_site_44_S86_BJ	974460	7895	Single	B9
SVT14_1851031040_site_45_S85_BJ	512134	7294	Single	B9
SVT14_1851031040_site_47_S89_BJ	1.01042e+06	8731	Single	B9
SVT14_1851031040_site_48_S88_BJ	727810	8506	Single	B9
SVT15_1851031045_site_02_S8_BJ	930229	7703	Single	B10
SVT15_1851031045_site_03_S9_BJ	682516	6989	Single	B10
SVT15_1851031045_site_04_S10_BJ	955457	8004	Single	B10
SVT15_1851031045_site_05_S11_BJ	954926	8487	Single	B10
SVT15_1851031045_site_07_S19_BJ	807173	8436	Single	B10
SVT15_1851031045_site_08_S20_BJ	764139	7161	Single	B10
SVT15_1851031045_site_09_S21_BJ	1.16225e+06	6569	Single	B10
SVT15_1851031045_site_11_S23_BJ	1.78149e+06	8509	Single	B10
SVT15_1851031045_site_12_S24_BJ	557963	8185	Single	B10
SVT15_1851031045_site_13_S31_BJ	605889	8533	Single	B10
SVT15_1851031045_site_14_S32_BJ	649875	8538	Single	B10
SVT15_1851031045_site_17_S35_BJ	1.97579e+06	6698	Single	B10
SVT15_1851031045_site_18_S36_BJ	877106	6243	Single	B10
SVT15_1851031045_site_21_S45_BJ	607293	8261	Single	B10
SVT15_1851031045_site_23_S47_BJ	743544	7987	Single	B10
SVT15_1851031045_site_25_S57_BJ	1.10075e+06	8107	Single	B10
SVT15_1851031045_site_26_S56_BJ	713590	6454	Single	B10
SVT15_1851031045_site_27_S55_BJ	750868	7742	Single	B10
SVT15_1851031045_site_28_S60_BJ	1.12625e+06	9325	Single	B10
SVT15_1851031045_site_29_S59_BJ	759624	8277	Single	B10
SVT15_1851031045_site_30_S58_BJ	2.21423e+06	7473	Single	B10
SVT15_1851031045_site_31_S69_BJ	951080	7304	Single	B10
SVT15_1851031045_site_32_S68_BJ	672358	7794	Single	B10
SVT15_1851031045_site_34_S72_BJ	1.2203e+06	9262	Single	B10
SVT15_1851031045_site_35_S71_BJ	896744	7511	Single	B10
SVT15_1851031045_site_37_S81_BJ	646656	8189	Single	B10
SVT15_1851031045_site_38_S80_BJ	797968	6943	Single	B10
SVT15_1851031045_site_39_S79_BJ	1.03389e+06	8130	Single	B10
SVT15_1851031045_site_40_S84_BJ	1.36416e+06	8583	Single	B10
SVT15_1851031045_site_41_S83_BJ	841362	8507	Single	B10
SVT15_1851031045_site_42_S82_BJ	982184	8262	Single	B10
SVT15_1851031045_site_43_S93_BJ	1.23949e+06	8760	Single	B10
SVT15_1851031045_site_44_S92_BJ	1.15476e+06	7764	Single	B10
SVT15_1851031045_site_45_S91_BJ	534809	8250	Single	B10
SVT15_1851031045_site_47_S95_BJ	108085	7410	Single	B10
SVT15_1851031045_site_48_S94_BJ	1.19126e+06	7932	Single	B10
SVT16_1851032009_site_01_S97_BJ	604337	6599	Single	B11
SVT16_1851032009_site_02_S98_BJ	976852	8179	Single	B11
SVT16_1851032009_site_03_S99_BJ	926782	8315	Single	B11
SVT16_1851032009_site_04_S100_BJ	1.02177e+06	8523	Single	B11
SVT16_1851032009_site_05_S101_BJ	758475	6839	Single	B11
SVT16_1851032009_site_07_S109_BJ	841319	7194	Single	B11
SVT16_1851032009_site_08_S110_BJ	759327	6669	Single	B11
SVT16_1851032009_site_09_S111_BJ	912051	7582	Single	B11
SVT16_1851032009_site_11_S113_BJ	835212	8327	Single	B11
SVT16_1851032009_site_12_S114_BJ	734227	8485	Single	B11
SVT16_1851032009_site_13_S121_BJ	557430	8415	Single	B11
SVT16_1851032009_site_14_S122_BJ	818044	9054	Single	B11
SVT16_1851032009_site_15_S123_BJ	974267	8483	Single	B11
SVT16_1851032009_site_16_S124_BJ	648266	7908	Single	B11
SVT16_1851032009_site_17_S125_BJ	742007	7625	Single	B11
SVT16_1851032009_site_18_S126_BJ	736659	7866	Single	B11
SVT16_1851032009_site_19_S133_BJ	693571	6404	Single	B11
SVT16_1851032009_site_21_S135_BJ	910438	7813	Single	B11
SVT16_1851032009_site_22_S136_BJ	566237	7936	Single	B11
SVT16_1851032009_site_24_S138_BJ	385764	6409	Single	B11
SVT16_1851032009_site_25_S147_BJ	1.03232e+06	7661	Single	B11
SVT16_1851032009_site_27_S145_BJ	1.13718e+06	7551	Single	B11
SVT16_1851032009_site_28_S150_BJ	753025	7408	Single	B11
SVT16_1851032009_site_29_S149_BJ	1.73736e+06	8969	Single	B11
SVT16_1851032009_site_30_S148_BJ	565435	7916	Single	B11
SVT16_1851032009_site_31_S159_BJ	829054	8248	Single	B11
SVT16_1851032009_site_33_S157_BJ	863392	6022	Single	B11
SVT16_1851032009_site_34_S162_BJ	463166	8635	Single	B11
SVT16_1851032009_site_35_S161_BJ	878835	9222	Single	B11
SVT16_1851032009_site_36_S160_BJ	592356	9142	Single	B11
SVT16_1851032009_site_37_S171_BJ	1.07185e+06	9344	Single	B11
SVT16_1851032009_site_38_S170_BJ	1.74521e+06	9354	Single	B11
SVT16_1851032009_site_39_S169_BJ	1.16492e+06	8444	Single	B11
SVT16_1851032009_site_40_S174_BJ	906444	8323	Single	B11
SVT16_1851032009_site_41_S173_BJ	910722	8860	Single	B11
SVT16_1851032009_site_42_S172_BJ	661859	8624	Single	B11
SVT16_1851032009_site_43_S183_BJ	1.09764e+06	8589	Single	B11
SVT16_1851032009_site_44_S182_BJ	474027	7812	Single	B11
SVT16_1851032009_site_46_S186_BJ	1.0758e+06	7947	Single	B11
SVT16_1851032009_site_47_S185_BJ	1.13287e+06	8481	Single	B11
SVT16_1851032009_site_48_S184_BJ	790641	7244	Single	B11
SVT17_1851032019_site_02_S104_BJ	1.30618e+06	7572	Single	B12
SVT17_1851032019_site_03_S105_BJ	1.41485e+06	8705	Single	B12
SVT17_1851032019_site_04_S106_BJ	1.22591e+06	8292	Single	B12
SVT17_1851032019_site_05_S107_BJ	978071	7729	Single	B12
SVT17_1851032019_site_06_S108_BJ	1.32057e+06	7456	Single	B12
SVT17_1851032019_site_08_S116_BJ	1.162e+06	8461	Single	B12
SVT17_1851032019_site_09_S117_BJ	1.08787e+06	7181	Single	B12
SVT17_1851032019_site_12_S120_BJ	1.19242e+06	7507	Single	B12
SVT17_1851032019_site_15_S129_BJ	1.04865e+06	8433	Single	B12
SVT17_1851032019_site_16_S130_BJ	795391	7234	Single	B12
SVT17_1851032019_site_17_S131_BJ	807113	6602	Single	B12
SVT17_1851032019_site_18_S132_BJ	1.04633e+06	8493	Single	B12
SVT17_1851032019_site_22_S142_BJ	1.02679e+06	7577	Single	B12
SVT17_1851032019_site_23_S143_BJ	875085	7048	Single	B12
SVT17_1851032019_site_24_S144_BJ	1.33139e+06	8074	Single	B12
SVT17_1851032019_site_26_S152_BJ	962583	7380	Single	B12
SVT17_1851032019_site_29_S155_BJ	825075	8407	Single	B12
SVT17_1851032019_site_30_S154_BJ	1.0404e+06	8156	Single	B12
SVT17_1851032019_site_31_S165_BJ	691901	9433	Single	B12
SVT17_1851032019_site_32_S164_BJ	858590	8176	Single	B12
SVT17_1851032019_site_34_S168_BJ	1.00512e+06	8334	Single	B12
SVT17_1851032019_site_35_S167_BJ	579967	7887	Single	B12
SVT17_1851032019_site_36_S166_BJ	1.25828e+06	8260	Single	B12
SVT17_1851032019_site_37_S177_BJ	1.04623e+06	7823	Single	B12
SVT17_1851032019_site_38_S176_BJ	974033	9185	Single	B12
SVT17_1851032019_site_40_S180_BJ	1.44693e+06	8101	Single	B12
SVT17_1851032019_site_42_S178_BJ	1.19681e+06	8418	Single	B12
SVT17_1851032019_site_43_S189_BJ	749469	8539	Single	B12
SVT17_1851032019_site_44_S188_BJ	672626	7435	Single	B12
SVT17_1851032019_site_46_S192_BJ	1.14523e+06	7807	Single	B12
SVT17_1851032019_site_47_S191_BJ	972559	8287	Single	B12
SVT17_1851032019_site_48_S190_BJ	1.30766e+06	8144	Single	B12
SVT1_1851031006_site_01_S1_K562	999541	6812	Single	B1
SVT1_1851031006_site_02_S2_K562	999171	7579	Single	B1
SVT1_1851031006_site_04_S4_K562	999352	8019	Single	B1
SVT1_1851031006_site_05_S5_K562	999033	8450	Single	B1
SVT1_1851031006_site_06_S6_K562	999259	8171	Single	B1
SVT1_1851031006_site_07_S13_K562	999337	8264	Single	B1
SVT1_1851031006_site_08_S14_K562	999295	7537	Single	B1
SVT1_1851031006_site_09_S15_K562	999275	8075	Single	B1
SVT1_1851031006_site_10_S16_K562	999382	7553	Single	B1
SVT1_1851031006_site_11_S17_K562	999009	8133	Single	B1
SVT1_1851031006_site_12_S18_K562	999266	7417	Single	B1
SVT1_1851031006_site_13_S25_K562	999687	7524	Single	B1
SVT1_1851031006_site_14_S26_K562	999306	7543	Single	B1
SVT1_1851031006_site_15_S27_K562	999179	7952	Single	B1
SVT1_1851031006_site_16_S28_K562	999159	7354	Single	B1
SVT1_1851031006_site_17_S29_K562	999302	7728	Single	B1
SVT1_1851031006_site_18_S30_K562	999417	7135	Single	B1
SVT1_1851031006_site_19_S37_K562	999157	7574	Single	B1
SVT1_1851031006_site_22_S40_K562	999327	7252	Single	B1
SVT1_1851031006_site_23_S41_K562	999220	6877	Single	B1
SVT1_1851031006_site_24_S42_K562	999262	7639	Single	B1
SVT1_1851031006_site_25_S51_K562	999340	6842	Single	B1
SVT1_1851031006_site_26_S50_K562	999202	8495	Single	B1
SVT1_1851031006_site_27_S49_K562	999326	6801	Single	B1
SVT1_1851031006_site_28_S54_K562	999229	7631	Single	B1
SVT1_1851031006_site_29_S53_K562	999391	8021	Single	B1
SVT1_1851031006_site_30_S52_K562	998882	7310	Single	B1
SVT1_1851031006_site_31_S63_K562	999348	7326	Single	B1
SVT1_1851031006_site_32_S62_K562	999387	7281	Single	B1
SVT1_1851031006_site_33_S61_K562	999330	6985	Single	B1
SVT1_1851031006_site_35_S65_K562	999173	7442	Single	B1
SVT1_1851031006_site_36_S64_K562	999260	6294	Single	B1
SVT1_1851031006_site_37_S75_K562	999078	6669	Single	B1
SVT1_1851031006_site_38_S74_K562	999358	6981	Single	B1
SVT1_1851031006_site_39_S73_K562	999210	8489	Single	B1
SVT1_1851031006_site_40_S78_K562	999356	6722	Single	B1
SVT1_1851031006_site_42_S76_K562	999303	7384	Single	B1
SVT1_1851031006_site_43_S87_K562	999497	7135	Single	B1
SVT1_1851031006_site_44_S86_K562	998778	7997	Single	B1
SVT1_1851031006_site_45_S85_K562	999299	6811	Single	B1
SVT1_1851031006_site_46_S90_K562	999065	8455	Single	B1
SVT1_1851031006_site_47_S89_K562	999145	8665	Single	B1
SVT1_1851031006_site_48_S88_K562	999456	6917	Single	B1
SVT2_1851032005_site_01_S7_K562	999428	6241	Single	B2
SVT2_1851032005_site_02_S8_K562	999419	7454	Single	B2
SVT2_1851032005_site_03_S9_K562	999369	7558	Single	B2
SVT2_1851032005_site_04_S10_K562	999541	6415	Single	B2
SVT2_1851032005_site_05_S11_K562	999147	7420	Single	B2
SVT2_1851032005_site_06_S12_K562	998997	6882	Single	B2
SVT2_1851032005_site_07_S19_K562	999172	7739	Single	B2
SVT2_1851032005_site_08_S20_K562	999654	7163	Single	B2
SVT2_1851032005_site_09_S21_K562	999281	8098	Single	B2
SVT2_1851032005_site_10_S22_K562	999116	7700	Single	B2
SVT2_1851032005_site_11_S23_K562	999485	6750	Single	B2
SVT2_1851032005_site_12_S24_K562	999552	7324	Single	B2
SVT2_1851032005_site_13_S31_K562	999043	6831	Single	B2
SVT2_1851032005_site_14_S32_K562	999364	6077	Single	B2
SVT2_1851032005_site_15_S33_K562	999285	7304	Single	B2
SVT2_1851032005_site_16_S34_K562	999554	6086	Single	B2
SVT2_1851032005_site_17_S35_K562	999216	6813	Single	B2
SVT2_1851032005_site_18_S36_K562	999200	6166	Single	B2
SVT2_1851032005_site_19_S43_K562	999334	6465	Single	B2
SVT2_1851032005_site_20_S44_K562	999079	7685	Single	B2
SVT2_1851032005_site_21_S45_K562	999458	7758	Single	B2
SVT2_1851032005_site_22_S46_K562	999322	7403	Single	B2
SVT2_1851032005_site_23_S47_K562	999424	7308	Single	B2
SVT2_1851032005_site_24_S48_K562	999509	6293	Single	B2
SVT2_1851032005_site_25_S57_K562	998859	8184	Single	B2
SVT2_1851032005_site_26_S56_K562	998935	6986	Single	B2
SVT2_1851032005_site_27_S55_K562	999053	7055	Single	B2
SVT2_1851032005_site_28_S60_K562	999299	7095	Single	B2
SVT2_1851032005_site_30_S58_K562	999426	5709	Single	B2
SVT2_1851032005_site_31_S69_K562	999374	6660	Single	B2
SVT2_1851032005_site_32_S68_K562	999306	7534	Single	B2
SVT2_1851032005_site_33_S67_K562	999387	7397	Single	B2
SVT2_1851032005_site_34_S72_K562	999284	7207	Single	B2
SVT2_1851032005_site_35_S71_K562	999345	7438	Single	B2
SVT2_1851032005_site_36_S70_K562	999616	6894	Single	B2
SVT2_1851032005_site_37_S81_K562	999248	7409	Single	B2
SVT2_1851032005_site_38_S80_K562	999313	7030	Single	B2
SVT2_1851032005_site_39_S79_K562	999014	6693	Single	B2
SVT2_1851032005_site_41_S83_K562	999408	7889	Single	B2
SVT2_1851032005_site_42_S82_K562	999447	7540	Single	B2
SVT2_1851032005_site_43_S93_K562	999182	7802	Single	B2
SVT2_1851032005_site_44_S92_K562	999282	7060	Single	B2
SVT2_1851032005_site_45_S91_K562	999258	7774	Single	B2
SVT2_1851032005_site_46_S96_K562	999224	8529	Single	B2
SVT2_1851032005_site_47_S95_K562	999405	7189	Single	B2
SVT2_1851032005_site_48_S94_K562	999384	7327	Single	B2
SVT3_1851033015_site_01_S193_K562	999516	8045	Single	B3
SVT3_1851033015_site_02_S194_K562	999411	8279	Single	B3
SVT3_1851033015_site_04_S196_K562	999502	7659	Single	B3
SVT3_1851033015_site_05_S197_K562	999473	8241	Single	B3
SVT3_1851033015_site_06_S198_K562	999319	8364	Single	B3
SVT3_1851033015_site_07_S205_K562	999228	7679	Single	B3
SVT3_1851033015_site_08_S206_K562	999480	7498	Single	B3
SVT3_1851033015_site_09_S207_K562	999366	7700	Single	B3
SVT3_1851033015_site_10_S208_K562	999150	8370	Single	B3
SVT3_1851033015_site_11_S209_K562	999443	8082	Single	B3
SVT3_1851033015_site_12_S210_K562	999584	7753	Single	B3
SVT3_1851033015_site_13_S217_K562	999431	7535	Single	B3
SVT3_1851033015_site_14_S218_K562	999519	7213	Single	B3
SVT3_1851033015_site_17_S221_K562	999594	6345	Single	B3
SVT3_1851033015_site_18_S222_K562	999149	7146	Single	B3
SVT3_1851033015_site_19_S229_K562	999339	7898	Single	B3
SVT3_1851033015_site_20_S230_K562	999271	7377	Single	B3
SVT3_1851033015_site_21_S231_K562	999420	6564	Single	B3
SVT3_1851033015_site_22_S232_K562	999335	8673	Single	B3
SVT3_1851033015_site_23_S233_K562	999244	8210	Single	B3
SVT3_1851033015_site_24_S234_K562	999451	6826	Single	B3
SVT3_1851033015_site_25_S243_K562	999391	8362	Single	B3
SVT3_1851033015_site_26_S242_K562	999155	7433	Single	B3
SVT3_1851033015_site_27_S241_K562	999456	6980	Single	B3
SVT3_1851033015_site_28_S246_K562	999362	7601	Single	B3
SVT3_1851033015_site_29_S245_K562	999556	7894	Single	B3
SVT3_1851033015_site_30_S244_K562	999330	8321	Single	B3
SVT3_1851033015_site_31_S255_K562	999424	7113	Single	B3
SVT3_1851033015_site_33_S253_K562	999086	7982	Single	B3
SVT3_1851033015_site_34_S258_K562	999303	7868	Single	B3
SVT3_1851033015_site_35_S257_K562	999290	7893	Single	B3
SVT3_1851033015_site_36_S256_K562	999548	7747	Single	B3
SVT3_1851033015_site_37_S267_K562	999541	7382	Single	B3
SVT3_1851033015_site_38_S266_K562	999375	6832	Single	B3
SVT3_1851033015_site_39_S265_K562	999298	7439	Single	B3
SVT3_1851033015_site_40_S270_K562	999123	8499	Single	B3
SVT3_1851033015_site_41_S269_K562	999259	7875	Single	B3
SVT3_1851033015_site_42_S268_K562	999286	8193	Single	B3
SVT3_1851033015_site_43_S279_K562	999354	8285	Single	B3
SVT3_1851033015_site_44_S278_K562	999159	7553	Single	B3
SVT3_1851033015_site_46_S282_K562	999301	6551	Single	B3
SVT3_1851033015_site_47_S281_K562	999227	7848	Single	B3
SVT3_1851033015_site_48_S280_K562	999254	7339	Single	B3
SVT4_1851031009_site_01_S97_K562	999430	7886	Single	B4
SVT4_1851031009_site_02_S98_K562	999454	8659	Single	B4
SVT4_1851031009_site_03_S99_K562	999570	8381	Single	B4
SVT4_1851031009_site_04_S100_K562	999422	7956	Single	B4
SVT4_1851031009_site_05_S101_K562	999577	8708	Single	B4
SVT4_1851031009_site_06_S102_K562	999480	8389	Single	B4
SVT4_1851031009_site_07_S109_K562	999296	8236	Single	B4
SVT4_1851031009_site_08_S110_K562	999304	7288	Single	B4
SVT4_1851031009_site_09_S111_K562	999408	8294	Single	B4
SVT4_1851031009_site_10_S112_K562	999556	8140	Single	B4
SVT4_1851031009_site_11_S113_K562	999637	8089	Single	B4
SVT4_1851031009_site_12_S114_K562	999436	8467	Single	B4
SVT4_1851031009_site_13_S121_K562	999341	8499	Single	B4
SVT4_1851031009_site_14_S122_K562	999218	8079	Single	B4
SVT4_1851031009_site_15_S123_K562	999472	8222	Single	B4
SVT4_1851031009_site_16_S124_K562	999547	7800	Single	B4
SVT4_1851031009_site_17_S125_K562	999386	8553	Single	B4
SVT4_1851031009_site_18_S126_K562	999325	8262	Single	B4
SVT4_1851031009_site_20_S134_K562	999362	8208	Single	B4
SVT4_1851031009_site_21_S135_K562	999425	7376	Single	B4
SVT4_1851031009_site_22_S136_K562	999524	7606	Single	B4
SVT4_1851031009_site_23_S137_K562	999360	7651	Single	B4
SVT4_1851031009_site_24_S138_K562	999778	7360	Single	B4
SVT4_1851031009_site_25_S147_K562	999687	6295	Single	B4
SVT4_1851031009_site_26_S146_K562	999535	7796	Single	B4
SVT4_1851031009_site_28_S150_K562	999567	6853	Single	B4
SVT4_1851031009_site_29_S149_K562	999196	7705	Single	B4
SVT4_1851031009_site_30_S148_K562	999294	8613	Single	B4
SVT4_1851031009_site_32_S158_K562	999299	8305	Single	B4
SVT4_1851031009_site_33_S157_K562	999425	7743	Single	B4
SVT4_1851031009_site_34_S162_K562	999560	7599	Single	B4
SVT4_1851031009_site_35_S161_K562	999241	7909	Single	B4
SVT4_1851031009_site_36_S160_K562	999287	7801	Single	B4
SVT4_1851031009_site_37_S171_K562	999406	9298	Single	B4
SVT4_1851031009_site_38_S170_K562	999654	7615	Single	B4
SVT4_1851031009_site_39_S169_K562	999449	8490	Single	B4
SVT4_1851031009_site_40_S174_K562	999467	8204	Single	B4
SVT4_1851031009_site_41_S173_K562	999210	8276	Single	B4
SVT4_1851031009_site_42_S172_K562	999301	8436	Single	B4
SVT4_1851031009_site_43_S183_K562	999283	8647	Single	B4
SVT4_1851031009_site_44_S182_K562	999436	7681	Single	B4
SVT4_1851031009_site_45_S181_K562	999400	7672	Single	B4
SVT4_1851031009_site_46_S186_K562	999627	6602	Single	B4
SVT4_1851031009_site_47_S185_K562	999233	8958	Single	B4
SVT4_1851031009_site_48_S184_K562	999144	8485	Single	B4
SVT5_1851032007_site_01_S103_K562	999591	8003	Single	B5
SVT5_1851032007_site_02_S104_K562	999636	6904	Single	B5
SVT5_1851032007_site_05_S107_K562	999547	7230	Single	B5
SVT5_1851032007_site_06_S108_K562	999203	8045	Single	B5
SVT5_1851032007_site_07_S115_K562	999321	7428	Single	B5
SVT5_1851032007_site_08_S116_K562	999337	8108	Single	B5
SVT5_1851032007_site_09_S117_K562	999585	8034	Single	B5
SVT5_1851032007_site_10_S118_K562	999628	7143	Single	B5
SVT5_1851032007_site_12_S120_K562	999577	7476	Single	B5
SVT5_1851032007_site_13_S127_K562	999429	8336	Single	B5
SVT5_1851032007_site_14_S128_K562	999554	7732	Single	B5
SVT5_1851032007_site_15_S129_K562	999295	8391	Single	B5
SVT5_1851032007_site_16_S130_K562	999447	7526	Single	B5
SVT5_1851032007_site_17_S131_K562	999413	7550	Single	B5
SVT5_1851032007_site_18_S132_K562	999345	8017	Single	B5
SVT5_1851032007_site_19_S139_K562	999601	7137	Single	B5
SVT5_1851032007_site_21_S141_K562	999377	7862	Single	B5
SVT5_1851032007_site_22_S142_K562	999420	8373	Single	B5
SVT5_1851032007_site_24_S144_K562	999603	7300	Single	B5
SVT5_1851032007_site_25_S153_K562	999475	7376	Single	B5
SVT5_1851032007_site_26_S152_K562	999380	8341	Single	B5
SVT5_1851032007_site_27_S151_K562	999235	7597	Single	B5
SVT5_1851032007_site_28_S156_K562	999395	7045	Single	B5
SVT5_1851032007_site_29_S155_K562	999630	7819	Single	B5
SVT5_1851032007_site_30_S154_K562	999359	8645	Single	B5
SVT5_1851032007_site_32_S164_K562	999637	6919	Single	B5
SVT5_1851032007_site_33_S163_K562	999074	8361	Single	B5
SVT5_1851032007_site_34_S168_K562	999546	6796	Single	B5
SVT5_1851032007_site_35_S167_K562	999466	7913	Single	B5
SVT5_1851032007_site_36_S166_K562	999488	8333	Single	B5
SVT5_1851032007_site_37_S177_K562	999661	6908	Single	B5
SVT5_1851032007_site_38_S176_K562	999414	8504	Single	B5
SVT5_1851032007_site_39_S175_K562	999378	8293	Single	B5
SVT5_1851032007_site_40_S180_K562	999524	7962	Single	B5
SVT5_1851032007_site_41_S179_K562	999571	7738	Single	B5
SVT5_1851032007_site_42_S178_K562	999370	7887	Single	B5
SVT5_1851032007_site_43_S189_K562	999183	8752	Single	B5
SVT5_1851032007_site_44_S188_K562	999307	8312	Single	B5
SVT5_1851032007_site_45_S187_K562	999078	8488	Single	B5
SVT5_1851032007_site_47_S191_K562	999137	7974	Single	B5
SVT5_1851032007_site_48_S190_K562	999436	6919	Single	B5
SVT7_1851031005_site_01_S1_K562	999245	7784	Single	B6
SVT7_1851031005_site_02_S2_K562	998966	5165	Single	B6
SVT7_1851031005_site_03_S3_K562	999133	8283	Single	B6
SVT7_1851031005_site_04_S4_K562	999076	8394	Single	B6
SVT7_1851031005_site_05_S5_K562	999618	7189	Single	B6
SVT7_1851031005_site_06_S6_K562	999054	7949	Single	B6
SVT7_1851031005_site_07_S13_K562	999165	7382	Single	B6
SVT7_1851031005_site_08_S14_K562	999488	7209	Single	B6
SVT7_1851031005_site_09_S15_K562	999341	7980	Single	B6
SVT7_1851031005_site_10_S16_K562	999032	8239	Single	B6
SVT7_1851031005_site_11_S17_K562	999333	5919	Single	B6
SVT7_1851031005_site_12_S18_K562	999035	7355	Single	B6
SVT7_1851031005_site_13_S25_K562	999196	7083	Single	B6
SVT7_1851031005_site_14_S26_K562	999066	7557	Single	B6
SVT7_1851031005_site_15_S27_K562	999097	7496	Single	B6
SVT7_1851031005_site_16_S28_K562	999387	7535	Single	B6
SVT7_1851031005_site_17_S29_K562	999284	7274	Single	B6
SVT7_1851031005_site_18_S30_K562	998818	8432	Single	B6
SVT7_1851031005_site_19_S37_K562	999229	8019	Single	B6
SVT7_1851031005_site_20_S38_K562	998993	7845	Single	B6
SVT7_1851031005_site_21_S39_K562	998654	8784	Single	B6
SVT7_1851031005_site_22_S40_K562	999451	6997	Single	B6
SVT7_1851031005_site_23_S41_K562	999251	8371	Single	B6
SVT7_1851031005_site_24_S42_K562	999297	7006	Single	B6
SVT7_1851031005_site_25_S51_K562	999014	7162	Single	B6
SVT7_1851031005_site_26_S50_K562	999358	7550	Single	B6
SVT7_1851031005_site_27_S49_K562	998969	7897	Single	B6
SVT7_1851031005_site_28_S54_K562	998955	8172	Single	B6
SVT7_1851031005_site_29_S53_K562	998940	7576	Single	B6
SVT7_1851031005_site_30_S52_K562	998696	8473	Single	B6
SVT7_1851031005_site_31_S63_K562	999101	7106	Single	B6
SVT7_1851031005_site_32_S62_K562	999208	7754	Single	B6
SVT7_1851031005_site_33_S61_K562	999275	7066	Single	B6
SVT7_1851031005_site_34_S66_K562	998582	7692	Single	B6
SVT7_1851031005_site_35_S65_K562	999057	8404	Single	B6
SVT7_1851031005_site_36_S64_K562	998861	8348	Single	B6
SVT7_1851031005_site_37_S75_K562	999085	6787	Single	B6
SVT7_1851031005_site_38_S74_K562	999140	7808	Single	B6
SVT7_1851031005_site_39_S73_K562	999022	7734	Single	B6
SVT7_1851031005_site_40_S78_K562	999060	8109	Single	B6
SVT7_1851031005_site_41_S77_K562	999229	7664	Single	B6
SVT7_1851031005_site_42_S76_K562	999319	7785	Single	B6
SVT7_1851031005_site_43_S87_K562	999373	7779	Single	B6
SVT7_1851031005_site_44_S86_K562	999240	7779	Single	B6
SVT7_1851031005_site_45_S85_K562	999279	8714	Single	B6
SVT7_1851031005_site_46_S90_K562	998970	8529	Single	B6
SVT7_1851031005_site_47_S89_K562	999393	7343	Single	B6
SVT7_1851031005_site_48_S88_K562	999228	6857	Single	B6
SVT8_1851031024_site_01_S7_K562	999488	7816	Single	B7
SVT8_1851031024_site_02_S8_K562	998765	7399	Single	B7
SVT8_1851031024_site_03_S9_K562	999419	8023	Single	B7
SVT8_1851031024_site_04_S10_K562	999332	6909	Single	B7
SVT8_1851031024_site_05_S11_K562	998789	8235	Single	B7
SVT8_1851031024_site_06_S12_K562	999467	6243	Single	B7
SVT8_1851031024_site_07_S19_K562	999261	8436	Single	B7
SVT8_1851031024_site_09_S21_K562	999156	8635	Single	B7
SVT8_1851031024_site_10_S22_K562	999024	8032	Single	B7
SVT8_1851031024_site_11_S23_K562	999177	7474	Single	B7
SVT8_1851031024_site_12_S24_K562	999318	5978	Single	B7
SVT8_1851031024_site_13_S31_K562	998828	7641	Single	B7
SVT8_1851031024_site_14_S32_K562	998712	7645	Single	B7
SVT8_1851031024_site_15_S33_K562	999215	7740	Single	B7
SVT8_1851031024_site_16_S34_K562	999083	7720	Single	B7
SVT8_1851031024_site_18_S36_K562	999140	7022	Single	B7
SVT8_1851031024_site_19_S43_K562	999049	7201	Single	B7
SVT8_1851031024_site_20_S44_K562	999215	6670	Single	B7
SVT8_1851031024_site_22_S46_K562	998733	8139	Single	B7
SVT8_1851031024_site_23_S47_K562	999582	7085	Single	B7
SVT8_1851031024_site_24_S48_K562	999037	7075	Single	B7
SVT8_1851031024_site_25_S57_K562	998873	7427	Single	B7
SVT8_1851031024_site_27_S55_K562	999118	7215	Single	B7
SVT8_1851031024_site_28_S60_K562	999339	7039	Single	B7
SVT8_1851031024_site_30_S58_K562	999090	9113	Single	B7
SVT8_1851031024_site_31_S69_K562	999207	7088	Single	B7
SVT8_1851031024_site_32_S68_K562	998852	8322	Single	B7
SVT8_1851031024_site_33_S67_K562	999170	7350	Single	B7
SVT8_1851031024_site_34_S72_K562	999312	6657	Single	B7
SVT8_1851031024_site_35_S71_K562	999490	6821	Single	B7
SVT8_1851031024_site_36_S70_K562	999026	7610	Single	B7
SVT8_1851031024_site_37_S81_K562	998968	7836	Single	B7
SVT8_1851031024_site_38_S80_K562	998665	9007	Single	B7
SVT8_1851031024_site_39_S79_K562	999311	7543	Single	B7
SVT8_1851031024_site_40_S84_K562	999109	7662	Single	B7
SVT8_1851031024_site_42_S82_K562	999177	8152	Single	B7
SVT8_1851031024_site_43_S93_K562	999033	8470	Single	B7
SVT8_1851031024_site_44_S92_K562	999204	7666	Single	B7
SVT8_1851031024_site_45_S91_K562	998793	7177	Single	B7
SVT8_1851031024_site_46_S96_K562	998848	8603	Single	B7
SVT8_1851031024_site_47_S95_K562	999007	7843	Single	B7
SVT8_1851031024_site_48_S94_K562	999070	7858	Single	B7
SVT9_1851032024_site_01_S97_K562	998786	8566	Single	B8
SVT9_1851032024_site_02_S98_K562	999287	8065	Single	B8
SVT9_1851032024_site_03_S99_K562	999285	8208	Single	B8
SVT9_1851032024_site_04_S100_K562	999419	8214	Single	B8
SVT9_1851032024_site_07_S104_K562	999267	7573	Single	B8
SVT9_1851032024_site_08_S105_K562	999281	7779	Single	B8
SVT9_1851032024_site_09_S106_K562	999920	4336	Single	B8
SVT9_1851032024_site_11_S108_K562	999467	8509	Single	B8
SVT9_1851032024_site_12_S109_K562	999259	7904	Single	B8
SVT9_1851032024_site_14_S112_K562	999594	6431	Single	B8
SVT9_1851032024_site_15_S113_K562	998917	8906	Single	B8
SVT9_1851032024_site_16_S114_K562	999439	7707	Single	B8
SVT9_1851032024_site_18_S116_K562	999412	7522	Single	B8
SVT9_1851032024_site_19_S118_K562	999119	7648	Single	B8
SVT9_1851032024_site_20_S119_K562	998955	8925	Single	B8
SVT9_1851032024_site_21_S120_K562	999305	8881	Single	B8
SVT9_1851032024_site_22_S121_K562	999176	8089	Single	B8
SVT9_1851032024_site_23_S122_K562	998976	8254	Single	B8
SVT9_1851032024_site_24_S123_K562	999132	6310	Single	B8
SVT9_1851032024_site_25_S127_K562	999529	7697	Single	B8
SVT9_1851032024_site_26_S126_K562	999694	7429	Single	B8
SVT9_1851032024_site_27_S125_K562	999424	7957	Single	B8
SVT9_1851032024_site_28_S130_K562	999322	7661	Single	B8
SVT9_1851032024_site_29_S129_K562	999243	8039	Single	B8
SVT9_1851032024_site_30_S128_K562	999546	5638	Single	B8
SVT9_1851032024_site_31_S133_K562	999067	5903	Single	B8
SVT9_1851032024_site_32_S132_K562	999007	7973	Single	B8
SVT9_1851032024_site_33_S131_K562	999207	7161	Single	B8
SVT9_1851032024_site_34_S136_K562	998891	6560	Single	B8
SVT9_1851032024_site_35_S135_K562	999463	8000	Single	B8
SVT9_1851032024_site_36_S134_K562	999159	8667	Single	B8
SVT9_1851032024_site_37_S139_K562	999191	9167	Single	B8
SVT9_1851032024_site_38_S138_K562	999474	7920	Single	B8
SVT9_1851032024_site_39_S137_K562	999029	8268	Single	B8
SVT9_1851032024_site_40_S142_K562	999243	8333	Single	B8
SVT9_1851032024_site_41_S141_K562	999102	8869	Single	B8
SVT9_1851032024_site_42_S140_K562	999276	7672	Single	B8
SVT9_1851032024_site_43_S145_K562	999276	8749	Single	B8
SVT9_1851032024_site_45_S143_K562	999256	8557	Single	B8
SVT9_1851032024_site_46_S148_K562	999402	8266	Single	B8
SVT9_1851032024_site_47_S147_K562	999564	7718	Single	B8
SVT9_1851032024_site_48_S146_K562	999031	8326	Single	B8
tube_K562_3-14_SVT4-6_S290_K562	2.60613e+06	11977	Bulk
tube_K562_3-15_SVT7-9_S291_K562	2.15638e+06	12130	Bulk
tube_K562_3-13_SVT1-3_S289_K562	2.47014e+06	12113	Bulk
tube_BJ_3-28_SVT24-29_S124_BJ	732672	11206	Bulk
tube_BJ_3-21_SVT14-17_S110_BJ	1.16252e+06	11641	Bulk
tube_BJ_3-19_SVT10-13_S103_BJ	934200	11258	Bulk
tube_BJ_3-26_SVT18-23_S117_BJ	925730	11632	Bulk
