# Supplementary material for: Modeling expression ranks for noise-tolerant differential expression analysis of scRNA-seq data
Source: HighWire-hosted journal article supplement (doi:10.1101/gr.267070.120), 2021-03-05
Supplement: Supplemental_Table_S3.xlsx [file Supplemental_Table_S3.xlsx]

## Sheet: Tung Bulk Dataset (NA19098 vs. 
Supplemental Table S3: Bulk based DEG calls for the Tung dataset (replicates NA19098 vs. NA19239).
Ensembl Gene ID	DEG Call
ENSG00000186510	DEG
ENSG00000162374	DEG
ENSG00000162777	DEG
ENSG00000160678	DEG
ENSG00000081277	DEG
ENSG00000162873	DEG
ENSG00000148680	DEG
ENSG00000023839	DEG
ENSG00000120054	DEG
ENSG00000203772	DEG
ENSG00000165973	DEG
ENSG00000174080	DEG
ENSG00000261594	DEG
ENSG00000189182	DEG
ENSG00000255737	DEG
ENSG00000185306	DEG
ENSG00000072657	DEG
ENSG00000151948	DEG
ENSG00000151952	DEG
ENSG00000041515	DEG
ENSG00000184302	DEG
ENSG00000267795	DEG
ENSG00000188897	DEG
ENSG00000166743	DEG
ENSG00000166869	DEG
ENSG00000177455	DEG
ENSG00000198848	DEG
ENSG00000125148	DEG
ENSG00000169715	DEG
ENSG00000205364	DEG
ENSG00000198417	DEG
ENSG00000125144	DEG
ENSG00000205358	DEG
ENSG00000159618	DEG
ENSG00000141096	DEG
ENSG00000184860	DEG
ENSG00000233670	DEG
ENSG00000075429	DEG
ENSG00000183206	DEG
ENSG00000206075	DEG
ENSG00000057149	DEG
ENSG00000125657	DEG
ENSG00000125730	DEG
ENSG00000141968	DEG
ENSG00000076924	DEG
ENSG00000188629	DEG
ENSG00000171466	DEG
ENSG00000160321	DEG
ENSG00000197134	DEG
ENSG00000161298	DEG
ENSG00000267260	DEG
ENSG00000185869	DEG
ENSG00000198453	DEG
ENSG00000181666	DEG
ENSG00000167644	DEG
ENSG00000167637	DEG
ENSG00000176222	DEG
ENSG00000167383	DEG
ENSG00000130529	DEG
ENSG00000161652	DEG
ENSG00000105357	DEG
ENSG00000131398	DEG
ENSG00000131409	DEG
ENSG00000213023	DEG
ENSG00000167555	DEG
ENSG00000258405	DEG
ENSG00000022556	DEG
ENSG00000018869	DEG
ENSG00000198046	DEG
ENSG00000196867	DEG
ENSG00000131849	DEG
ENSG00000134330	DEG
ENSG00000138083	DEG
ENSG00000222000	DEG
ENSG00000196460	DEG
ENSG00000153234	DEG
ENSG00000101082	DEG
ENSG00000053438	DEG
ENSG00000184674	DEG
ENSG00000133454	DEG
ENSG00000100314	DEG
ENSG00000177873	DEG
ENSG00000183662	DEG
ENSG00000172139	DEG
ENSG00000013293	DEG
ENSG00000157005	DEG
ENSG00000186777	DEG
ENSG00000064042	DEG
ENSG00000156219	DEG
ENSG00000168743	DEG
ENSG00000198865	DEG
ENSG00000113209	DEG
ENSG00000196963	DEG
ENSG00000164265	DEG
ENSG00000133710	DEG
ENSG00000113327	DEG
ENSG00000178187	DEG
ENSG00000145975	DEG
ENSG00000137434	DEG
ENSG00000182611	DEG
ENSG00000106153	DEG
ENSG00000213199	DEG
ENSG00000183117	DEG
ENSG00000160886	DEG
ENSG00000182759	DEG
ENSG00000169306	DEG
ENSG00000198205	DEG
ENSG00000147381	DEG
ERCC-00085	DEG
ENSG00000237683	Not DEG
ENSG00000187634	Not DEG
ENSG00000188976	Not DEG
ENSG00000187961	Not DEG
ENSG00000187583	Not DEG
ENSG00000187642	Not DEG
ENSG00000187608	Not DEG
ENSG00000188157	Not DEG
ENSG00000237330	Not DEG
ENSG00000131591	Not DEG
ENSG00000162571	Not DEG
ENSG00000078808	Not DEG
ENSG00000176022	Not DEG
ENSG00000184163	Not DEG
ENSG00000160087	Not DEG
ENSG00000162572	Not DEG
ENSG00000131584	Not DEG
ENSG00000169972	Not DEG
ENSG00000127054	Not DEG
ENSG00000224051	Not DEG
ENSG00000169962	Not DEG
ENSG00000107404	Not DEG
ENSG00000162576	Not DEG
ENSG00000175756	Not DEG
ENSG00000221978	Not DEG
ENSG00000224870	Not DEG
ENSG00000242485	Not DEG
ENSG00000235098	Not DEG
ENSG00000179403	Not DEG
ENSG00000215915	Not DEG
ENSG00000160072	Not DEG
ENSG00000197785	Not DEG
ENSG00000205090	Not DEG
ENSG00000160075	Not DEG
ENSG00000215014	Not DEG
ENSG00000228594	Not DEG
ENSG00000197530	Not DEG
ENSG00000189409	Not DEG
ENSG00000248333	Not DEG
ENSG00000189339	Not DEG
ENSG00000008128	Not DEG
ENSG00000215790	Not DEG
ENSG00000008130	Not DEG
ENSG00000078369	Not DEG
ENSG00000169885	Not DEG
ENSG00000178821	Not DEG
ENSG00000142609	Not DEG
ENSG00000187730	Not DEG
ENSG00000067606	Not DEG
ENSG00000162585	Not DEG
ENSG00000269554	Not DEG
ENSG00000203301	Not DEG
ENSG00000157933	Not DEG
ENSG00000116151	Not DEG
ENSG00000157916	Not DEG
ENSG00000157911	Not DEG
ENSG00000157881	Not DEG
ENSG00000197921	Not DEG
ENSG00000157873	Not DEG
ENSG00000157870	Not DEG
ENSG00000142606	Not DEG
ENSG00000215912	Not DEG
ENSG00000142611	Not DEG
ENSG00000130762	Not DEG
ENSG00000162591	Not DEG
ENSG00000158109	Not DEG
ENSG00000116213	Not DEG
ENSG00000078900	Not DEG
ENSG00000235169	Not DEG
ENSG00000130764	Not DEG
ENSG00000116198	Not DEG
ENSG00000169598	Not DEG
ENSG00000198912	Not DEG
ENSG00000196581	Not DEG
ENSG00000131697	Not DEG
ENSG00000069424	Not DEG
ENSG00000116254	Not DEG
ENSG00000116251	Not DEG
ENSG00000158286	Not DEG
ENSG00000116237	Not DEG
ENSG00000173673	Not DEG
ENSG00000158292	Not DEG
ENSG00000097021	Not DEG
ENSG00000069812	Not DEG
ENSG00000187017	Not DEG
ENSG00000215788	Not DEG
ENSG00000171680	Not DEG
ENSG00000162408	Not DEG
ENSG00000173662	Not DEG
ENSG00000204859	Not DEG
ENSG00000162413	Not DEG
ENSG00000116273	Not DEG
ENSG00000041988	Not DEG
ENSG00000007923	Not DEG
ENSG00000171735	Not DEG
ENSG00000049245	Not DEG
ENSG00000049246	Not DEG
ENSG00000049247	Not DEG
ENSG00000116288	Not DEG
ENSG00000116285	Not DEG
ENSG00000162426	Not DEG
ENSG00000142599	Not DEG
ENSG00000074800	Not DEG
ENSG00000197241	Not DEG
ENSG00000142583	Not DEG
ENSG00000180758	Not DEG
ENSG00000049239	Not DEG
ENSG00000171621	Not DEG
ENSG00000171612	Not DEG
ENSG00000188807	Not DEG
ENSG00000171608	Not DEG
ENSG00000171603	Not DEG
ENSG00000178585	Not DEG
ENSG00000162441	Not DEG
ENSG00000173614	Not DEG
ENSG00000162444	Not DEG
ENSG00000130939	Not DEG
ENSG00000054523	Not DEG
ENSG00000142657	Not DEG
ENSG00000175279	Not DEG
ENSG00000160049	Not DEG
ENSG00000142655	Not DEG
ENSG00000130940	Not DEG
ENSG00000175262	Not DEG
ENSG00000120948	Not DEG
ENSG00000009724	Not DEG
ENSG00000116649	Not DEG
ENSG00000171824	Not DEG
ENSG00000198793	Not DEG
ENSG00000120942	Not DEG
ENSG00000204624	Not DEG
ENSG00000116661	Not DEG
ENSG00000132879	Not DEG
ENSG00000116663	Not DEG
ENSG00000116670	Not DEG
ENSG00000162490	Not DEG
ENSG00000177674	Not DEG
ENSG00000215910	Not DEG
ENSG00000177000	Not DEG
ENSG00000011021	Not DEG
ENSG00000120937	Not DEG
ENSG00000116685	Not DEG
ENSG00000083444	Not DEG
ENSG00000116688	Not DEG
ENSG00000116691	Not DEG
ENSG00000120949	Not DEG
ENSG00000028137	Not DEG
ENSG00000048707	Not DEG
ENSG00000162496	Not DEG
ENSG00000188984	Not DEG
ENSG00000179172	Not DEG
ENSG00000162494	Not DEG
ENSG00000162493	Not DEG
ENSG00000116731	Not DEG
ENSG00000189337	Not DEG
ENSG00000171729	Not DEG
ENSG00000204464	Not DEG
ENSG00000142621	Not DEG
ENSG00000142634	Not DEG
ENSG00000162438	Not DEG
ENSG00000215704	Not DEG
ENSG00000132906	Not DEG
ENSG00000116138	Not DEG
ENSG00000116771	Not DEG
ENSG00000197312	Not DEG
ENSG00000116786	Not DEG
ENSG00000162461	Not DEG
ENSG00000162460	Not DEG
ENSG00000162458	Not DEG
ENSG00000065526	Not DEG
ENSG00000116809	Not DEG
ENSG00000183888	Not DEG
ENSG00000184908	Not DEG
ENSG00000185519	Not DEG
ENSG00000142627	Not DEG
ENSG00000142632	Not DEG
ENSG00000204377	Not DEG
ENSG00000132881	Not DEG
ENSG00000037637	Not DEG
ENSG00000055070	Not DEG
ENSG00000187144	Not DEG
ENSG00000157191	Not DEG
ENSG00000219481	Not DEG
ENSG00000058453	Not DEG
ENSG00000117122	Not DEG
ENSG00000159363	Not DEG
ENSG00000117118	Not DEG
ENSG00000117115	Not DEG
ENSG00000142623	Not DEG
ENSG00000142619	Not DEG
ENSG00000159339	Not DEG
ENSG00000179051	Not DEG
ENSG00000074964	Not DEG
ENSG00000117148	Not DEG
ENSG00000117154	Not DEG
ENSG00000179023	Not DEG
ENSG00000009709	Not DEG
ENSG00000159423	Not DEG
ENSG00000169991	Not DEG
ENSG00000127481	Not DEG
ENSG00000127463	Not DEG
ENSG00000053372	Not DEG
ENSG00000162482	Not DEG
ENSG00000053371	Not DEG
ENSG00000040487	Not DEG
ENSG00000077549	Not DEG
ENSG00000270136	Not DEG
ENSG00000173436	Not DEG
ENSG00000158747	Not DEG
ENSG00000158748	Not DEG
ENSG00000162542	Not DEG
ENSG00000169914	Not DEG
ENSG00000188257	Not DEG
ENSG00000162543	Not DEG
ENSG00000158816	Not DEG
ENSG00000162545	Not DEG
ENSG00000090432	Not DEG
ENSG00000183114	Not DEG
ENSG00000158825	Not DEG
ENSG00000158828	Not DEG
ENSG00000244038	Not DEG
ENSG00000117245	Not DEG
ENSG00000189410	Not DEG
ENSG00000127483	Not DEG
ENSG00000075151	Not DEG
ENSG00000117298	Not DEG
ENSG00000142794	Not DEG
ENSG00000162551	Not DEG
ENSG00000076864	Not DEG
ENSG00000090686	Not DEG
ENSG00000187942	Not DEG
ENSG00000142798	Not DEG
ENSG00000070831	Not DEG
ENSG00000162552	Not DEG
ENSG00000184677	Not DEG
ENSG00000070886	Not DEG
ENSG00000133216	Not DEG
ENSG00000004487	Not DEG
ENSG00000169641	Not DEG
ENSG00000179546	Not DEG
ENSG00000125944	Not DEG
ENSG00000125945	Not DEG
ENSG00000249087	Not DEG
ENSG00000204219	Not DEG
ENSG00000088280	Not DEG
ENSG00000007968	Not DEG
ENSG00000117318	Not DEG
ENSG00000142676	Not DEG
ENSG00000011007	Not DEG
ENSG00000057757	Not DEG
ENSG00000011009	Not DEG
ENSG00000117308	Not DEG
ENSG00000117305	Not DEG
ENSG00000179163	Not DEG
ENSG00000188822	Not DEG
ENSG00000189266	Not DEG
ENSG00000188529	Not DEG
ENSG00000142661	Not DEG
ENSG00000142677	Not DEG
ENSG00000185436	Not DEG
ENSG00000158055	Not DEG
ENSG00000001460	Not DEG
ENSG00000001461	Not DEG
ENSG00000117602	Not DEG
ENSG00000184454	Not DEG
ENSG00000133226	Not DEG
ENSG00000169504	Not DEG
ENSG00000020633	Not DEG
ENSG00000117614	Not DEG
ENSG00000117616	Not DEG
ENSG00000187010	Not DEG
ENSG00000183726	Not DEG
ENSG00000188672	Not DEG
ENSG00000204178	Not DEG
ENSG00000157978	Not DEG
ENSG00000117643	Not DEG
ENSG00000162430	Not DEG
ENSG00000117640	Not DEG
ENSG00000223474	Not DEG
ENSG00000127423	Not DEG
ENSG00000182749	Not DEG
ENSG00000117632	Not DEG
ENSG00000158006	Not DEG
ENSG00000158008	Not DEG
ENSG00000158014	Not DEG
ENSG00000158022	Not DEG
ENSG00000175087	Not DEG
ENSG00000197245	Not DEG
ENSG00000142684	Not DEG
ENSG00000142675	Not DEG
ENSG00000188782	Not DEG
ENSG00000130695	Not DEG
ENSG00000142669	Not DEG
ENSG00000158062	Not DEG
ENSG00000169442	Not DEG
ENSG00000176092	Not DEG
ENSG00000131914	Not DEG
ENSG00000117682	Not DEG
ENSG00000198830	Not DEG
ENSG00000117676	Not DEG
ENSG00000117713	Not DEG
ENSG00000060642	Not DEG
ENSG00000204160	Not DEG
ENSG00000175793	Not DEG
ENSG00000142751	Not DEG
ENSG00000198746	Not DEG
ENSG00000090273	Not DEG
ENSG00000175707	Not DEG
ENSG00000253368	Not DEG
ENSG00000158246	Not DEG
ENSG00000090020	Not DEG
ENSG00000142784	Not DEG
ENSG00000186501	Not DEG
ENSG00000142765	Not DEG
ENSG00000142733	Not DEG
ENSG00000174950	Not DEG
ENSG00000181773	Not DEG
ENSG00000158195	Not DEG
ENSG00000126705	Not DEG
ENSG00000000938	Not DEG
ENSG00000126709	Not DEG
ENSG00000009780	Not DEG
ENSG00000117758	Not DEG
ENSG00000117751	Not DEG
ENSG00000130775	Not DEG
ENSG00000117748	Not DEG
ENSG00000130768	Not DEG
ENSG00000158156	Not DEG
ENSG00000158161	Not DEG
ENSG00000169403	Not DEG
ENSG00000126698	Not DEG
ENSG00000269804	Not DEG
ENSG00000130770	Not DEG
ENSG00000130766	Not DEG
ENSG00000130772	Not DEG
ENSG00000204138	Not DEG
ENSG00000180198	Not DEG
ENSG00000180098	Not DEG
ENSG00000120656	Not DEG
ENSG00000188060	Not DEG
ENSG00000162419	Not DEG
ENSG00000198492	Not DEG
ENSG00000159023	Not DEG
ENSG00000253304	Not DEG
ENSG00000116350	Not DEG
ENSG00000116353	Not DEG
ENSG00000060656	Not DEG
ENSG00000162511	Not DEG
ENSG00000162512	Not DEG
ENSG00000134644	Not DEG
ENSG00000084628	Not DEG
ENSG00000060688	Not DEG
ENSG00000121766	Not DEG
ENSG00000121769	Not DEG
ENSG00000168528	Not DEG
ENSG00000268950	Not DEG
ENSG00000142910	Not DEG
ENSG00000121764	Not DEG
ENSG00000162517	Not DEG
ENSG00000084636	Not DEG
ENSG00000121753	Not DEG
ENSG00000134668	Not DEG
ENSG00000184007	Not DEG
ENSG00000121774	Not DEG
ENSG00000121775	Not DEG
ENSG00000025800	Not DEG
ENSG00000084652	Not DEG
ENSG00000160050	Not DEG
ENSG00000160051	Not DEG
ENSG00000222046	Not DEG
ENSG00000160055	Not DEG
ENSG00000084623	Not DEG
ENSG00000183615	Not DEG
ENSG00000182866	Not DEG
ENSG00000116478	Not DEG
ENSG00000175130	Not DEG
ENSG00000225828	Not DEG
ENSG00000160058	Not DEG
ENSG00000254553	Not DEG
ENSG00000273274	Not DEG
ENSG00000160062	Not DEG
ENSG00000176261	Not DEG
ENSG00000162521	Not DEG
ENSG00000162520	Not DEG
ENSG00000162522	Not DEG
ENSG00000134684	Not DEG
ENSG00000116497	Not DEG
ENSG00000160097	Not DEG
ENSG00000121905	Not DEG
ENSG00000121900	Not DEG
ENSG00000116514	Not DEG
ENSG00000004455	Not DEG
ENSG00000142920	Not DEG
ENSG00000116525	Not DEG
ENSG00000160094	Not DEG
ENSG00000134686	Not DEG
ENSG00000121903	Not DEG
ENSG00000121904	Not DEG
ENSG00000142698	Not DEG
ENSG00000163866	Not DEG
ENSG00000189280	Not DEG
ENSG00000189433	Not DEG
ENSG00000188910	Not DEG
ENSG00000187513	Not DEG
ENSG00000116544	Not DEG
ENSG00000271741	Not DEG
ENSG00000243749	Not DEG
ENSG00000163867	Not DEG
ENSG00000197056	Not DEG
ENSG00000116560	Not DEG
ENSG00000146463	Not DEG
ENSG00000142687	Not DEG
ENSG00000020129	Not DEG
ENSG00000116819	Not DEG
ENSG00000126067	Not DEG
ENSG00000142686	Not DEG
ENSG00000092853	Not DEG
ENSG00000134698	Not DEG
ENSG00000092847	Not DEG
ENSG00000126070	Not DEG
ENSG00000092850	Not DEG
ENSG00000116863	Not DEG
ENSG00000171812	Not DEG
ENSG00000054116	Not DEG
ENSG00000116871	Not DEG
ENSG00000054118	Not DEG
ENSG00000214193	Not DEG
ENSG00000142694	Not DEG
ENSG00000116883	Not DEG
ENSG00000196182	Not DEG
ENSG00000181817	Not DEG
ENSG00000116885	Not DEG
ENSG00000116898	Not DEG
ENSG00000119535	Not DEG
ENSG00000163873	Not DEG
ENSG00000163874	Not DEG
ENSG00000163875	Not DEG
ENSG00000163877	Not DEG
ENSG00000163879	Not DEG
ENSG00000134697	Not DEG
ENSG00000169218	Not DEG
ENSG00000116922	Not DEG
ENSG00000134690	Not DEG
ENSG00000183317	Not DEG
ENSG00000185090	Not DEG
ENSG00000196449	Not DEG
ENSG00000197982	Not DEG
ENSG00000188786	Not DEG
ENSG00000204084	Not DEG
ENSG00000183431	Not DEG
ENSG00000183386	Not DEG
ENSG00000183520	Not DEG
ENSG00000185668	Not DEG
ENSG00000116954	Not DEG
ENSG00000214114	Not DEG
ENSG00000158315	Not DEG
ENSG00000174574	Not DEG
ENSG00000168653	Not DEG
ENSG00000127603	Not DEG
ENSG00000255103	Not DEG
ENSG00000090621	Not DEG
ENSG00000163909	Not DEG
ENSG00000116983	Not DEG
ENSG00000084072	Not DEG
ENSG00000116985	Not DEG
ENSG00000198754	Not DEG
ENSG00000043514	Not DEG
ENSG00000116990	Not DEG
ENSG00000168389	Not DEG
ENSG00000131236	Not DEG
ENSG00000131238	Not DEG
ENSG00000117000	Not DEG
ENSG00000084073	Not DEG
ENSG00000049089	Not DEG
ENSG00000084070	Not DEG
ENSG00000187801	Not DEG
ENSG00000187815	Not DEG
ENSG00000164002	Not DEG
ENSG00000117010	Not DEG
ENSG00000117016	Not DEG
ENSG00000066136	Not DEG
ENSG00000117013	Not DEG
ENSG00000179862	Not DEG
ENSG00000171793	Not DEG
ENSG00000171790	Not DEG
ENSG00000010803	Not DEG
ENSG00000204060	Not DEG
ENSG00000127124	Not DEG
ENSG00000198815	Not DEG
ENSG00000177181	Not DEG
ENSG00000066185	Not DEG
ENSG00000127125	Not DEG
ENSG00000186409	Not DEG
ENSG00000171960	Not DEG
ENSG00000065978	Not DEG
ENSG00000164007	Not DEG
ENSG00000117385	Not DEG
ENSG00000164008	Not DEG
ENSG00000177868	Not DEG
ENSG00000164010	Not DEG
ENSG00000164011	Not DEG
ENSG00000117394	Not DEG
ENSG00000186973	Not DEG
ENSG00000117395	Not DEG
ENSG00000243710	Not DEG
ENSG00000179178	Not DEG
ENSG00000253313	Not DEG
ENSG00000066056	Not DEG
ENSG00000117399	Not DEG
ENSG00000066322	Not DEG
ENSG00000159479	Not DEG
ENSG00000198198	Not DEG
ENSG00000178922	Not DEG
ENSG00000142949	Not DEG
ENSG00000066135	Not DEG
ENSG00000126091	Not DEG
ENSG00000117407	Not DEG
ENSG00000117408	Not DEG
ENSG00000132768	Not DEG
ENSG00000117410	Not DEG
ENSG00000117411	Not DEG
ENSG00000159214	Not DEG
ENSG00000196517	Not DEG
ENSG00000171872	Not DEG
ENSG00000178028	Not DEG
ENSG00000117419	Not DEG
ENSG00000187147	Not DEG
ENSG00000126106	Not DEG
ENSG00000198520	Not DEG
ENSG00000142945	Not DEG
ENSG00000142937	Not DEG
ENSG00000142959	Not DEG
ENSG00000173846	Not DEG
ENSG00000188396	Not DEG
ENSG00000222009	Not DEG
ENSG00000117425	Not DEG
ENSG00000070785	Not DEG
ENSG00000126107	Not DEG
ENSG00000126088	Not DEG
ENSG00000162415	Not DEG
ENSG00000186603	Not DEG
ENSG00000132781	Not DEG
ENSG00000132773	Not DEG
ENSG00000070759	Not DEG
ENSG00000236624	Not DEG
ENSG00000132763	Not DEG
ENSG00000117450	Not DEG
ENSG00000117448	Not DEG
ENSG00000132780	Not DEG
ENSG00000159588	Not DEG
ENSG00000159592	Not DEG
ENSG00000159596	Not DEG
ENSG00000197429	Not DEG
ENSG00000086015	Not DEG
ENSG00000117461	Not DEG
ENSG00000085998	Not DEG
ENSG00000171357	Not DEG
ENSG00000085999	Not DEG
ENSG00000132128	Not DEG
ENSG00000173660	Not DEG
ENSG00000117481	Not DEG
ENSG00000117480	Not DEG
ENSG00000197587	Not DEG
ENSG00000079277	Not DEG
ENSG00000142961	Not DEG
ENSG00000123472	Not DEG
ENSG00000159658	Not DEG
ENSG00000186118	Not DEG
ENSG00000186377	Not DEG
ENSG00000162367	Not DEG
ENSG00000123473	Not DEG
ENSG00000162368	Not DEG
ENSG00000186790	Not DEG
ENSG00000186564	Not DEG
ENSG00000269113	Not DEG
ENSG00000132122	Not DEG
ENSG00000186094	Not DEG
ENSG00000162373	Not DEG
ENSG00000142700	Not DEG
ENSG00000185104	Not DEG
ENSG00000123091	Not DEG
ENSG00000085831	Not DEG
ENSG00000085832	Not DEG
ENSG00000117859	Not DEG
ENSG00000078618	Not DEG
ENSG00000169213	Not DEG
ENSG00000117862	Not DEG
ENSG00000198841	Not DEG
ENSG00000134717	Not DEG
ENSG00000157077	Not DEG
ENSG00000154222	Not DEG
ENSG00000085840	Not DEG
ENSG00000134748	Not DEG
ENSG00000134744	Not DEG
ENSG00000116157	Not DEG
ENSG00000182183	Not DEG
ENSG00000162377	Not DEG
ENSG00000162378	Not DEG
ENSG00000203995	Not DEG
ENSG00000121310	Not DEG
ENSG00000116171	Not DEG
ENSG00000174348	Not DEG
ENSG00000162383	Not DEG
ENSG00000157184	Not DEG
ENSG00000162384	Not DEG
ENSG00000162385	Not DEG
ENSG00000157193	Not DEG
ENSG00000174332	Not DEG
ENSG00000058804	Not DEG
ENSG00000058799	Not DEG
ENSG00000211452	Not DEG
ENSG00000081870	Not DEG
ENSG00000116212	Not DEG
ENSG00000116209	Not DEG
ENSG00000116205	Not DEG
ENSG00000212670	Not DEG
ENSG00000157211	Not DEG
ENSG00000256407	Not DEG
ENSG00000248835	Not DEG
ENSG00000215883	Not DEG
ENSG00000116221	Not DEG
ENSG00000157216	Not DEG
ENSG00000162390	Not DEG
ENSG00000162391	Not DEG
ENSG00000243725	Not DEG
ENSG00000162396	Not DEG
ENSG00000006555	Not DEG
ENSG00000162398	Not DEG
ENSG00000116133	Not DEG
ENSG00000143001	Not DEG
ENSG00000162399	Not DEG
ENSG00000169174	Not DEG
ENSG00000162402	Not DEG
ENSG00000162407	Not DEG
ENSG00000162409	Not DEG
ENSG00000187889	Not DEG
ENSG00000173406	Not DEG
ENSG00000162600	Not DEG
ENSG00000184292	Not DEG
ENSG00000162601	Not DEG
ENSG00000177606	Not DEG
ENSG00000172456	Not DEG
ENSG00000134709	Not DEG
ENSG00000134716	Not DEG
ENSG00000162598	Not DEG
ENSG00000162599	Not DEG
ENSG00000162604	Not DEG
ENSG00000132849	Not DEG
ENSG00000240563	Not DEG
ENSG00000132854	Not DEG
ENSG00000162607	Not DEG
ENSG00000116641	Not DEG
ENSG00000125703	Not DEG
ENSG00000187140	Not DEG
ENSG00000088035	Not DEG
ENSG00000142856	Not DEG
ENSG00000203965	Not DEG
ENSG00000116652	Not DEG
ENSG00000079739	Not DEG
ENSG00000185483	Not DEG
ENSG00000158966	Not DEG
ENSG00000162437	Not DEG
ENSG00000162434	Not DEG
ENSG00000162433	Not DEG
ENSG00000116675	Not DEG
ENSG00000116678	Not DEG
ENSG00000213625	Not DEG
ENSG00000184588	Not DEG
ENSG00000118473	Not DEG
ENSG00000152760	Not DEG
ENSG00000152763	Not DEG
ENSG00000198160	Not DEG
ENSG00000116704	Not DEG
ENSG00000081985	Not DEG
ENSG00000142864	Not DEG
ENSG00000116717	Not DEG
ENSG00000172380	Not DEG
ENSG00000162595	Not DEG
ENSG00000116729	Not DEG
ENSG00000116745	Not DEG
ENSG00000024526	Not DEG
ENSG00000033122	Not DEG
ENSG00000066557	Not DEG
ENSG00000116754	Not DEG
ENSG00000118454	Not DEG
ENSG00000197568	Not DEG
ENSG00000116761	Not DEG
ENSG00000050628	Not DEG
ENSG00000132485	Not DEG
ENSG00000172260	Not DEG
ENSG00000162620	Not DEG
ENSG00000254685	Not DEG
ENSG00000259030	Not DEG
ENSG00000116791	Not DEG
ENSG00000162623	Not DEG
ENSG00000162624	Not DEG
ENSG00000137968	Not DEG
ENSG00000117054	Not DEG
ENSG00000137955	Not DEG
ENSG00000184005	Not DEG
ENSG00000117069	Not DEG
ENSG00000142892	Not DEG
ENSG00000154027	Not DEG
ENSG00000036549	Not DEG
ENSG00000077254	Not DEG
ENSG00000180488	Not DEG
ENSG00000162614	Not DEG
ENSG00000162613	Not DEG
ENSG00000162616	Not DEG
ENSG00000137960	Not DEG
ENSG00000122420	Not DEG
ENSG00000162618	Not DEG
ENSG00000117114	Not DEG
ENSG00000137941	Not DEG
ENSG00000142875	Not DEG
ENSG00000203943	Not DEG
ENSG00000117133	Not DEG
ENSG00000174021	Not DEG
ENSG00000117151	Not DEG
ENSG00000117155	Not DEG
ENSG00000171517	Not DEG
ENSG00000153898	Not DEG
ENSG00000162643	Not DEG
ENSG00000055732	Not DEG
ENSG00000097096	Not DEG
ENSG00000162642	Not DEG
ENSG00000142867	Not DEG
ENSG00000153904	Not DEG
ENSG00000142871	Not DEG
ENSG00000117174	Not DEG
ENSG00000171502	Not DEG
ENSG00000122417	Not DEG
ENSG00000097033	Not DEG
ENSG00000183291	Not DEG
ENSG00000153936	Not DEG
ENSG00000143013	Not DEG
ENSG00000065243	Not DEG
ENSG00000137947	Not DEG
ENSG00000137944	Not DEG
ENSG00000213516	Not DEG
ENSG00000162645	Not DEG
ENSG00000162654	Not DEG
ENSG00000197147	Not DEG
ENSG00000171488	Not DEG
ENSG00000171492	Not DEG
ENSG00000162664	Not DEG
ENSG00000143032	Not DEG
ENSG00000122482	Not DEG
ENSG00000162669	Not DEG
ENSG00000097046	Not DEG
ENSG00000069702	Not DEG
ENSG00000137948	Not DEG
ENSG00000172031	Not DEG
ENSG00000189195	Not DEG
ENSG00000069712	Not DEG
ENSG00000174842	Not DEG
ENSG00000122484	Not DEG
ENSG00000162676	Not DEG
ENSG00000067208	Not DEG
ENSG00000122406	Not DEG
ENSG00000154511	Not DEG
ENSG00000143033	Not DEG
ENSG00000117500	Not DEG
ENSG00000122483	Not DEG
ENSG00000117505	Not DEG
ENSG00000137942	Not DEG
ENSG00000137936	Not DEG
ENSG00000067334	Not DEG
ENSG00000023909	Not DEG
ENSG00000198691	Not DEG
ENSG00000137962	Not DEG
ENSG00000117528	Not DEG
ENSG00000117525	Not DEG
ENSG00000143036	Not DEG
ENSG00000117519	Not DEG
ENSG00000172339	Not DEG
ENSG00000152078	Not DEG
ENSG00000122481	Not DEG
ENSG00000117569	Not DEG
ENSG00000188641	Not DEG
ENSG00000162627	Not DEG
ENSG00000117598	Not DEG
ENSG00000117600	Not DEG
ENSG00000156869	Not DEG
ENSG00000162688	Not DEG
ENSG00000117620	Not DEG
ENSG00000156875	Not DEG
ENSG00000156876	Not DEG
ENSG00000122435	Not DEG
ENSG00000122477	Not DEG
ENSG00000137992	Not DEG
ENSG00000137996	Not DEG
ENSG00000079335	Not DEG
ENSG00000162692	Not DEG
ENSG00000162694	Not DEG
ENSG00000162695	Not DEG
ENSG00000117543	Not DEG
ENSG00000269175	Not DEG
ENSG00000170989	Not DEG
ENSG00000118733	Not DEG
ENSG00000060718	Not DEG
ENSG00000185946	Not DEG
ENSG00000240038	Not DEG
ENSG00000174876	Not DEG
ENSG00000198890	Not DEG
ENSG00000162631	Not DEG
ENSG00000134215	Not DEG
ENSG00000085491	Not DEG
ENSG00000162636	Not DEG
ENSG00000162639	Not DEG
ENSG00000134186	Not DEG
ENSG00000143107	Not DEG
ENSG00000116266	Not DEG
ENSG00000162641	Not DEG
ENSG00000121957	Not DEG
ENSG00000121940	Not DEG
ENSG00000085433	Not DEG
ENSG00000197780	Not DEG
ENSG00000215717	Not DEG
ENSG00000116299	Not DEG
ENSG00000031698	Not DEG
ENSG00000143126	Not DEG
ENSG00000134222	Not DEG
ENSG00000221986	Not DEG
ENSG00000134243	Not DEG
ENSG00000143106	Not DEG
ENSG00000143028	Not DEG
ENSG00000162650	Not DEG
ENSG00000174151	Not DEG
ENSG00000181754	Not DEG
ENSG00000156097	Not DEG
ENSG00000065135	Not DEG
ENSG00000134183	Not DEG
ENSG00000116337	Not DEG
ENSG00000168765	Not DEG
ENSG00000213366	Not DEG
ENSG00000134184	Not DEG
ENSG00000134201	Not DEG
ENSG00000134202	Not DEG
ENSG00000184371	Not DEG
ENSG00000168710	Not DEG
ENSG00000143093	Not DEG
ENSG00000156150	Not DEG
ENSG00000197106	Not DEG
ENSG00000116396	Not DEG
ENSG00000162775	Not DEG
ENSG00000168679	Not DEG
ENSG00000134248	Not DEG
ENSG00000177301	Not DEG
ENSG00000177272	Not DEG
ENSG00000143119	Not DEG
ENSG00000121931	Not DEG
ENSG00000156171	Not DEG
ENSG00000134255	Not DEG
ENSG00000173947	Not DEG
ENSG00000085465	Not DEG
ENSG00000116455	Not DEG
ENSG00000116459	Not DEG
ENSG00000143110	Not DEG
ENSG00000121933	Not DEG
ENSG00000116473	Not DEG
ENSG00000197852	Not DEG
ENSG00000064703	Not DEG
ENSG00000171385	Not DEG
ENSG00000143079	Not DEG
ENSG00000134245	Not DEG
ENSG00000007341	Not DEG
ENSG00000116489	Not DEG
ENSG00000155363	Not DEG
ENSG00000155366	Not DEG
ENSG00000155367	Not DEG
ENSG00000184599	Not DEG
ENSG00000155380	Not DEG
ENSG00000198799	Not DEG
ENSG00000081026	Not DEG
ENSG00000116793	Not DEG
ENSG00000081019	Not DEG
ENSG00000188761	Not DEG
ENSG00000134262	Not DEG
ENSG00000118655	Not DEG
ENSG00000163349	Not DEG
ENSG00000116774	Not DEG
ENSG00000134207	Not DEG
ENSG00000197323	Not DEG
ENSG00000116752	Not DEG
ENSG00000175984	Not DEG
ENSG00000213281	Not DEG
ENSG00000009307	Not DEG
ENSG00000052723	Not DEG
ENSG00000198765	Not DEG
ENSG00000134198	Not DEG
ENSG00000134259	Not DEG
ENSG00000173218	Not DEG
ENSG00000177551	Not DEG
ENSG00000163393	Not DEG
ENSG00000163399	Not DEG
ENSG00000269279	Not DEG
ENSG00000116815	Not DEG
ENSG00000143061	Not DEG
ENSG00000134247	Not DEG
ENSG00000134256	Not DEG
ENSG00000116830	Not DEG
ENSG00000134253	Not DEG
ENSG00000134258	Not DEG
ENSG00000198162	Not DEG
ENSG00000183508	Not DEG
ENSG00000196505	Not DEG
ENSG00000065183	Not DEG
ENSG00000155761	Not DEG
ENSG00000116874	Not DEG
ENSG00000143067	Not DEG
ENSG00000092621	Not DEG
ENSG00000134193	Not DEG
ENSG00000134250	Not DEG
ENSG00000188610	Not DEG
ENSG00000236334	Not DEG
ENSG00000215784	Not DEG
ENSG00000162825	Not DEG
ENSG00000231360	Not DEG
ENSG00000255854	Not DEG
ENSG00000168614	Not DEG
ENSG00000178104	Not DEG
ENSG00000268172	Not DEG
ENSG00000213240	Not DEG
ENSG00000163386	Not DEG
ENSG00000168509	Not DEG
ENSG00000117289	Not DEG
ENSG00000121851	Not DEG
ENSG00000181039	Not DEG
ENSG00000152022	Not DEG
ENSG00000131795	Not DEG
ENSG00000131779	Not DEG
ENSG00000143127	Not DEG
ENSG00000198483	Not DEG
ENSG00000131788	Not DEG
ENSG00000186364	Not DEG
ENSG00000186141	Not DEG
ENSG00000121848	Not DEG
ENSG00000117281	Not DEG
ENSG00000174827	Not DEG
ENSG00000117262	Not DEG
ENSG00000196644	Not DEG
ENSG00000152042	Not DEG
ENSG00000186275	Not DEG
ENSG00000131791	Not DEG
ENSG00000131781	Not DEG
ENSG00000131778	Not DEG
ENSG00000116128	Not DEG
ENSG00000162836	Not DEG
ENSG00000143140	Not DEG
ENSG00000188092	Not DEG
ENSG00000203836	Not DEG
ENSG00000122497	Not DEG
ENSG00000256374	Not DEG
ENSG00000203832	Not DEG
ENSG00000243452	Not DEG
ENSG00000203827	Not DEG
ENSG00000203817	Not DEG
ENSG00000198161	Not DEG
ENSG00000203814	Not DEG
ENSG00000183598	Not DEG
ENSG00000183941	Not DEG
ENSG00000203812	Not DEG
ENSG00000203852	Not DEG
ENSG00000182217	Not DEG
ENSG00000184678	Not DEG
ENSG00000184260	Not DEG
ENSG00000184270	Not DEG
ENSG00000178096	Not DEG
ENSG00000159164	Not DEG
ENSG00000143368	Not DEG
ENSG00000014914	Not DEG
ENSG00000163113	Not DEG
ENSG00000136631	Not DEG
ENSG00000023902	Not DEG
ENSG00000143401	Not DEG
ENSG00000118298	Not DEG
ENSG00000117362	Not DEG
ENSG00000118292	Not DEG
ENSG00000159208	Not DEG
ENSG00000187145	Not DEG
ENSG00000117360	Not DEG
ENSG00000163125	Not DEG
ENSG00000143374	Not DEG
ENSG00000143369	Not DEG
ENSG00000143382	Not DEG
ENSG00000143384	Not DEG
ENSG00000143420	Not DEG
ENSG00000143457	Not DEG
ENSG00000143387	Not DEG
ENSG00000143437	Not DEG
ENSG00000143379	Not DEG
ENSG00000143418	Not DEG
ENSG00000143412	Not DEG
ENSG00000143409	Not DEG
ENSG00000143363	Not DEG
ENSG00000163141	Not DEG
ENSG00000143443	Not DEG
ENSG00000197622	Not DEG
ENSG00000213190	Not DEG
ENSG00000143458	Not DEG
ENSG00000143434	Not DEG
ENSG00000163154	Not DEG
ENSG00000163156	Not DEG
ENSG00000163155	Not DEG
ENSG00000163159	Not DEG
ENSG00000143398	Not DEG
ENSG00000159352	Not DEG
ENSG00000232671	Not DEG
ENSG00000143373	Not DEG
ENSG00000143393	Not DEG
ENSG00000143390	Not DEG
ENSG00000143416	Not DEG
ENSG00000159377	Not DEG
ENSG00000143442	Not DEG
ENSG00000143375	Not DEG
ENSG00000143367	Not DEG
ENSG00000143376	Not DEG
ENSG00000159409	Not DEG
ENSG00000143436	Not DEG
ENSG00000143450	Not DEG
ENSG00000182134	Not DEG
ENSG00000143365	Not DEG
ENSG00000225556	Not DEG
ENSG00000159445	Not DEG
ENSG00000197747	Not DEG
ENSG00000163191	Not DEG
ENSG00000159450	Not DEG
ENSG00000244094	Not DEG
ENSG00000203782	Not DEG
ENSG00000197956	Not DEG
ENSG00000196154	Not DEG
ENSG00000188015	Not DEG
ENSG00000196754	Not DEG
ENSG00000188643	Not DEG
ENSG00000189334	Not DEG
ENSG00000189171	Not DEG
ENSG00000160679	Not DEG
ENSG00000143553	Not DEG
ENSG00000143621	Not DEG
ENSG00000169418	Not DEG
ENSG00000143624	Not DEG
ENSG00000143554	Not DEG
ENSG00000143614	Not DEG
ENSG00000198837	Not DEG
ENSG00000160741	Not DEG
ENSG00000143570	Not DEG
ENSG00000143578	Not DEG
ENSG00000143543	Not DEG
ENSG00000143545	Not DEG
ENSG00000177954	Not DEG
ENSG00000143552	Not DEG
ENSG00000143549	Not DEG
ENSG00000143612	Not DEG
ENSG00000143569	Not DEG
ENSG00000143575	Not DEG
ENSG00000143595	Not DEG
ENSG00000143515	Not DEG
ENSG00000160712	Not DEG
ENSG00000169291	Not DEG
ENSG00000163239	Not DEG
ENSG00000160714	Not DEG
ENSG00000160716	Not DEG
ENSG00000160710	Not DEG
ENSG00000143603	Not DEG
ENSG00000163344	Not DEG
ENSG00000163346	Not DEG
ENSG00000163348	Not DEG
ENSG00000160691	Not DEG
ENSG00000173207	Not DEG
ENSG00000160688	Not DEG
ENSG00000163352	Not DEG
ENSG00000160685	Not DEG
ENSG00000163354	Not DEG
ENSG00000143537	Not DEG
ENSG00000243364	Not DEG
ENSG00000143590	Not DEG
ENSG00000169242	Not DEG
ENSG00000169241	Not DEG
ENSG00000179085	Not DEG
ENSG00000163463	Not DEG
ENSG00000163462	Not DEG
ENSG00000185499	Not DEG
ENSG00000169231	Not DEG
ENSG00000173171	Not DEG
ENSG00000177628	Not DEG
ENSG00000160767	Not DEG
ENSG00000116521	Not DEG
ENSG00000176444	Not DEG
ENSG00000143630	Not DEG
ENSG00000143627	Not DEG
ENSG00000160752	Not DEG
ENSG00000160753	Not DEG
ENSG00000116539	Not DEG
ENSG00000125459	Not DEG
ENSG00000163374	Not DEG
ENSG00000132676	Not DEG
ENSG00000116580	Not DEG
ENSG00000132718	Not DEG
ENSG00000143622	Not DEG
ENSG00000132680	Not DEG
ENSG00000116584	Not DEG
ENSG00000163479	Not DEG
ENSG00000160803	Not DEG
ENSG00000116586	Not DEG
ENSG00000132698	Not DEG
ENSG00000254726	Not DEG
ENSG00000160789	Not DEG
ENSG00000196189	Not DEG
ENSG00000160785	Not DEG
ENSG00000260238	Not DEG
ENSG00000160783	Not DEG
ENSG00000242252	Not DEG
ENSG00000160781	Not DEG
ENSG00000198952	Not DEG
ENSG00000163472	Not DEG
ENSG00000198715	Not DEG
ENSG00000163468	Not DEG
ENSG00000163467	Not DEG
ENSG00000132677	Not DEG
ENSG00000125462	Not DEG
ENSG00000116604	Not DEG
ENSG00000183856	Not DEG
ENSG00000163382	Not DEG
ENSG00000160818	Not DEG
ENSG00000132702	Not DEG
ENSG00000132692	Not DEG
ENSG00000132688	Not DEG
ENSG00000143320	Not DEG
ENSG00000143319	Not DEG
ENSG00000143303	Not DEG
ENSG00000143314	Not DEG
ENSG00000143321	Not DEG
ENSG00000143294	Not DEG
ENSG00000027869	Not DEG
ENSG00000198400	Not DEG
ENSG00000187800	Not DEG
ENSG00000132694	Not DEG
ENSG00000253831	Not DEG
ENSG00000117036	Not DEG
ENSG00000143297	Not DEG
ENSG00000183853	Not DEG
ENSG00000158473	Not DEG
ENSG00000158481	Not DEG
ENSG00000180708	Not DEG
ENSG00000163554	Not DEG
ENSG00000163565	Not DEG
ENSG00000163568	Not DEG
ENSG00000162706	Not DEG
ENSG00000213088	Not DEG
ENSG00000158716	Not DEG
ENSG00000188004	Not DEG
ENSG00000213085	Not DEG
ENSG00000158710	Not DEG
ENSG00000085552	Not DEG
ENSG00000143315	Not DEG
ENSG00000177807	Not DEG
ENSG00000162728	Not DEG
ENSG00000162729	Not DEG
ENSG00000018625	Not DEG
ENSG00000132681	Not DEG
ENSG00000143318	Not DEG
ENSG00000162734	Not DEG
ENSG00000132716	Not DEG
ENSG00000162735	Not DEG
ENSG00000122218	Not DEG
ENSG00000162736	Not DEG
ENSG00000171786	Not DEG
ENSG00000162738	Not DEG
ENSG00000066294	Not DEG
ENSG00000117091	Not DEG
ENSG00000179914	Not DEG
ENSG00000158764	Not DEG
ENSG00000158769	Not DEG
ENSG00000215845	Not DEG
ENSG00000158773	Not DEG
ENSG00000186517	Not DEG
ENSG00000143217	Not DEG
ENSG00000162755	Not DEG
ENSG00000143256	Not DEG
ENSG00000158793	Not DEG
ENSG00000158796	Not DEG
ENSG00000143222	Not DEG
ENSG00000143258	Not DEG
ENSG00000143224	Not DEG
ENSG00000158850	Not DEG
ENSG00000158859	Not DEG
ENSG00000158864	Not DEG
ENSG00000158869	Not DEG
ENSG00000158874	Not DEG
ENSG00000158882	Not DEG
ENSG00000143257	Not DEG
ENSG00000248485	Not DEG
ENSG00000158887	Not DEG
ENSG00000143252	Not DEG
ENSG00000188931	Not DEG
ENSG00000143226	Not DEG
ENSG00000203747	Not DEG
ENSG00000162746	Not DEG
ENSG00000081721	Not DEG
ENSG00000118217	Not DEG
ENSG00000162745	Not DEG
ENSG00000198929	Not DEG
ENSG00000239887	Not DEG
ENSG00000152332	Not DEG
ENSG00000117143	Not DEG
ENSG00000162733	Not DEG
ENSG00000132196	Not DEG
ENSG00000185860	Not DEG
ENSG00000117152	Not DEG
ENSG00000143248	Not DEG
ENSG00000143228	Not DEG
ENSG00000185630	Not DEG
ENSG00000143171	Not DEG
ENSG00000143198	Not DEG
ENSG00000143149	Not DEG
ENSG00000143183	Not DEG
ENSG00000143179	Not DEG
ENSG00000188859	Not DEG
ENSG00000143157	Not DEG
ENSG00000152382	Not DEG
ENSG00000143195	Not DEG
ENSG00000143194	Not DEG
ENSG00000143167	Not DEG
ENSG00000198842	Not DEG
ENSG00000143190	Not DEG
ENSG00000198821	Not DEG
ENSG00000143162	Not DEG
ENSG00000198771	Not DEG
ENSG00000197965	Not DEG
ENSG00000143199	Not DEG
ENSG00000143158	Not DEG
ENSG00000143164	Not DEG
ENSG00000143147	Not DEG
ENSG00000143155	Not DEG
ENSG00000213064	Not DEG
ENSG00000143178	Not DEG
ENSG00000143153	Not DEG
ENSG00000143156	Not DEG
ENSG00000117475	Not DEG
ENSG00000117477	Not DEG
ENSG00000117479	Not DEG
ENSG00000198734	Not DEG
ENSG00000000460	Not DEG
ENSG00000188404	Not DEG
ENSG00000171806	Not DEG
ENSG00000000457	Not DEG
ENSG00000075945	Not DEG
ENSG00000120370	Not DEG
ENSG00000116132	Not DEG
ENSG00000010932	Not DEG
ENSG00000076258	Not DEG
ENSG00000117523	Not DEG
ENSG00000117533	Not DEG
ENSG00000010165	Not DEG
ENSG00000197959	Not DEG
ENSG00000135845	Not DEG
ENSG00000094975	Not DEG
ENSG00000117586	Not DEG
ENSG00000117592	Not DEG
ENSG00000183831	Not DEG
ENSG00000076321	Not DEG
ENSG00000120334	Not DEG
ENSG00000117593	Not DEG
ENSG00000185278	Not DEG
ENSG00000135870	Not DEG
ENSG00000152061	Not DEG
ENSG00000116161	Not DEG
ENSG00000120333	Not DEG
ENSG00000120332	Not DEG
ENSG00000235750	Not DEG
ENSG00000116147	Not DEG
ENSG00000143207	Not DEG
ENSG00000116183	Not DEG
ENSG00000152092	Not DEG
ENSG00000198797	Not DEG
ENSG00000120341	Not DEG
ENSG00000075391	Not DEG
ENSG00000213057	Not DEG
ENSG00000116191	Not DEG
ENSG00000116199	Not DEG
ENSG00000186283	Not DEG
ENSG00000143322	Not DEG
ENSG00000057252	Not DEG
ENSG00000162779	Not DEG
ENSG00000162782	Not DEG
ENSG00000143340	Not DEG
ENSG00000169905	Not DEG
ENSG00000143337	Not DEG
ENSG00000135837	Not DEG
ENSG00000116260	Not DEG
ENSG00000121454	Not DEG
ENSG00000135847	Not DEG
ENSG00000143324	Not DEG
ENSG00000135835	Not DEG
ENSG00000135823	Not DEG
ENSG00000153029	Not DEG
ENSG00000162783	Not DEG
ENSG00000198216	Not DEG
ENSG00000179930	Not DEG
ENSG00000135821	Not DEG
ENSG00000203730	Not DEG
ENSG00000135828	Not DEG
ENSG00000143333	Not DEG
ENSG00000135824	Not DEG
ENSG00000135838	Not DEG
ENSG00000135829	Not DEG
ENSG00000157060	Not DEG
ENSG00000135862	Not DEG
ENSG00000058085	Not DEG
ENSG00000157064	Not DEG
ENSG00000116698	Not DEG
ENSG00000116701	Not DEG
ENSG00000162704	Not DEG
ENSG00000143344	Not DEG
ENSG00000198756	Not DEG
ENSG00000198860	Not DEG
ENSG00000116667	Not DEG
ENSG00000116406	Not DEG
ENSG00000135842	Not DEG
ENSG00000121481	Not DEG
ENSG00000121486	Not DEG
ENSG00000116668	Not DEG
ENSG00000116679	Not DEG
ENSG00000143341	Not DEG
ENSG00000047410	Not DEG
ENSG00000157181	Not DEG
ENSG00000262180	Not DEG
ENSG00000073756	Not DEG
ENSG00000116711	Not DEG
ENSG00000162670	Not DEG
ENSG00000116741	Not DEG
ENSG00000116750	Not DEG
ENSG00000116747	Not DEG
ENSG00000023572	Not DEG
ENSG00000134371	Not DEG
ENSG00000162687	Not DEG
ENSG00000066279	Not DEG
ENSG00000177888	Not DEG
ENSG00000134376	Not DEG
ENSG00000213047	Not DEG
ENSG00000203724	Not DEG
ENSG00000143355	Not DEG
ENSG00000151414	Not DEG
ENSG00000116833	Not DEG
ENSG00000162702	Not DEG
ENSG00000118193	Not DEG
ENSG00000118197	Not DEG
ENSG00000118200	Not DEG
ENSG00000163362	Not DEG
ENSG00000116852	Not DEG
ENSG00000081248	Not DEG
ENSG00000232237	Not DEG
ENSG00000116857	Not DEG
ENSG00000118194	Not DEG
ENSG00000159166	Not DEG
ENSG00000159173	Not DEG
ENSG00000174307	Not DEG
ENSG00000159176	Not DEG
ENSG00000134369	Not DEG
ENSG00000198700	Not DEG
ENSG00000198892	Not DEG
ENSG00000163431	Not DEG
ENSG00000134375	Not DEG
ENSG00000176393	Not DEG
ENSG00000163435	Not DEG
ENSG00000170075	Not DEG
ENSG00000143862	Not DEG
ENSG00000143851	Not DEG
ENSG00000133067	Not DEG
ENSG00000077152	Not DEG
ENSG00000077157	Not DEG
ENSG00000143858	Not DEG
ENSG00000117139	Not DEG
ENSG00000184774	Not DEG
ENSG00000183155	Not DEG
ENSG00000117153	Not DEG
ENSG00000159346	Not DEG
ENSG00000159348	Not DEG
ENSG00000163444	Not DEG
ENSG00000143847	Not DEG
ENSG00000163485	Not DEG
ENSG00000133048	Not DEG
ENSG00000133063	Not DEG
ENSG00000159388	Not DEG
ENSG00000122176	Not DEG
ENSG00000188783	Not DEG
ENSG00000188770	Not DEG
ENSG00000058668	Not DEG
ENSG00000058673	Not DEG
ENSG00000257315	Not DEG
ENSG00000182004	Not DEG
ENSG00000143842	Not DEG
ENSG00000143845	Not DEG
ENSG00000174567	Not DEG
ENSG00000143850	Not DEG
ENSG00000158615	Not DEG
ENSG00000133056	Not DEG
ENSG00000198625	Not DEG
ENSG00000170382	Not DEG
ENSG00000163531	Not DEG
ENSG00000184144	Not DEG
ENSG00000174529	Not DEG
ENSG00000117222	Not DEG
ENSG00000133059	Not DEG
ENSG00000133069	Not DEG
ENSG00000163545	Not DEG
ENSG00000186007	Not DEG
ENSG00000117266	Not DEG
ENSG00000174514	Not DEG
ENSG00000158711	Not DEG
ENSG00000158715	Not DEG
ENSG00000069275	Not DEG
ENSG00000268313	Not DEG
ENSG00000117280	Not DEG
ENSG00000133065	Not DEG
ENSG00000174502	Not DEG
ENSG00000196550	Not DEG
ENSG00000198049	Not DEG
ENSG00000196533	Not DEG
ENSG00000163486	Not DEG
ENSG00000143466	Not DEG
ENSG00000136653	Not DEG
ENSG00000143486	Not DEG
ENSG00000143479	Not DEG
ENSG00000162889	Not DEG
ENSG00000162894	Not DEG
ENSG00000182795	Not DEG
ENSG00000180667	Not DEG
ENSG00000123836	Not DEG
ENSG00000196352	Not DEG
ENSG00000117322	Not DEG
ENSG00000203710	Not DEG
ENSG00000197721	Not DEG
ENSG00000117335	Not DEG
ENSG00000174059	Not DEG
ENSG00000076356	Not DEG
ENSG00000008118	Not DEG
ENSG00000196878	Not DEG
ENSG00000123689	Not DEG
ENSG00000009790	Not DEG
ENSG00000162757	Not DEG
ENSG00000117595	Not DEG
ENSG00000117597	Not DEG
ENSG00000143469	Not DEG
ENSG00000082497	Not DEG
ENSG00000054392	Not DEG
ENSG00000143473	Not DEG
ENSG00000117625	Not DEG
ENSG00000082512	Not DEG
ENSG00000198570	Not DEG
ENSG00000170385	Not DEG
ENSG00000117650	Not DEG
ENSG00000123684	Not DEG
ENSG00000143493	Not DEG
ENSG00000143476	Not DEG
ENSG00000066027	Not DEG
ENSG00000065600	Not DEG
ENSG00000117691	Not DEG
ENSG00000162772	Not DEG
ENSG00000162771	Not DEG
ENSG00000123685	Not DEG
ENSG00000117697	Not DEG
ENSG00000203705	Not DEG
ENSG00000185523	Not DEG
ENSG00000162769	Not DEG
ENSG00000143494	Not DEG
ENSG00000174606	Not DEG
ENSG00000136643	Not DEG
ENSG00000117707	Not DEG
ENSG00000143499	Not DEG
ENSG00000152104	Not DEG
ENSG00000117724	Not DEG
ENSG00000082482	Not DEG
ENSG00000136636	Not DEG
ENSG00000042781	Not DEG
ENSG00000196482	Not DEG
ENSG00000092978	Not DEG
ENSG00000162814	Not DEG
ENSG00000067533	Not DEG
ENSG00000092969	Not DEG
ENSG00000228208	Not DEG
ENSG00000143353	Not DEG
ENSG00000196660	Not DEG
ENSG00000136628	Not DEG
ENSG00000162813	Not DEG
ENSG00000067704	Not DEG
ENSG00000118873	Not DEG
ENSG00000116141	Not DEG
ENSG00000162817	Not DEG
ENSG00000117791	Not DEG
ENSG00000186205	Not DEG
ENSG00000136630	Not DEG
ENSG00000143507	Not DEG
ENSG00000143512	Not DEG
ENSG00000143498	Not DEG
ENSG00000154305	Not DEG
ENSG00000186063	Not DEG
ENSG00000162819	Not DEG
ENSG00000197520	Not DEG
ENSG00000154309	Not DEG
ENSG00000187554	Not DEG
ENSG00000143502	Not DEG
ENSG00000203697	Not DEG
ENSG00000162909	Not DEG
ENSG00000143514	Not DEG
ENSG00000143756	Not DEG
ENSG00000143753	Not DEG
ENSG00000143748	Not DEG
ENSG00000143771	Not DEG
ENSG00000162923	Not DEG
ENSG00000143786	Not DEG
ENSG00000185842	Not DEG
ENSG00000143815	Not DEG
ENSG00000154380	Not DEG
ENSG00000143742	Not DEG
ENSG00000143819	Not DEG
ENSG00000196187	Not DEG
ENSG00000243709	Not DEG
ENSG00000143811	Not DEG
ENSG00000143768	Not DEG
ENSG00000143751	Not DEG
ENSG00000163041	Not DEG
ENSG00000182827	Not DEG
ENSG00000185155	Not DEG
ENSG00000183814	Not DEG
ENSG00000143799	Not DEG
ENSG00000203685	Not DEG
ENSG00000143772	Not DEG
ENSG00000143801	Not DEG
ENSG00000163050	Not DEG
ENSG00000143776	Not DEG
ENSG00000181450	Not DEG
ENSG00000143740	Not DEG
ENSG00000081692	Not DEG
ENSG00000143816	Not DEG
ENSG00000154342	Not DEG
ENSG00000143761	Not DEG
ENSG00000143793	Not DEG
ENSG00000162910	Not DEG
ENSG00000143774	Not DEG
ENSG00000198835	Not DEG
ENSG00000181873	Not DEG
ENSG00000162913	Not DEG
ENSG00000154358	Not DEG
ENSG00000154370	Not DEG
ENSG00000162931	Not DEG
ENSG00000181218	Not DEG
ENSG00000196890	Not DEG
ENSG00000168159	Not DEG
ENSG00000116574	Not DEG
ENSG00000168118	Not DEG
ENSG00000154429	Not DEG
ENSG00000143632	Not DEG
ENSG00000069248	Not DEG
ENSG00000135776	Not DEG
ENSG00000135801	Not DEG
ENSG00000135763	Not DEG
ENSG00000143641	Not DEG
ENSG00000177614	Not DEG
ENSG00000135775	Not DEG
ENSG00000135744	Not DEG
ENSG00000135773	Not DEG
ENSG00000119280	Not DEG
ENSG00000143643	Not DEG
ENSG00000173409	Not DEG
ENSG00000182118	Not DEG
ENSG00000119283	Not DEG
ENSG00000143633	Not DEG
ENSG00000116906	Not DEG
ENSG00000116903	Not DEG
ENSG00000010072	Not DEG
ENSG00000135766	Not DEG
ENSG00000116918	Not DEG
ENSG00000162946	Not DEG
ENSG00000116991	Not DEG
ENSG00000212916	Not DEG
ENSG00000135778	Not DEG
ENSG00000135749	Not DEG
ENSG00000143674	Not DEG
ENSG00000135750	Not DEG
ENSG00000183780	Not DEG
ENSG00000168275	Not DEG
ENSG00000059588	Not DEG
ENSG00000168264	Not DEG
ENSG00000173726	Not DEG
ENSG00000188739	Not DEG
ENSG00000054267	Not DEG
ENSG00000152904	Not DEG
ENSG00000116957	Not DEG
ENSG00000162885	Not DEG
ENSG00000168243	Not DEG
ENSG00000143669	Not DEG
ENSG00000116962	Not DEG
ENSG00000077585	Not DEG
ENSG00000086619	Not DEG
ENSG00000186197	Not DEG
ENSG00000116977	Not DEG
ENSG00000119285	Not DEG
ENSG00000077522	Not DEG
ENSG00000116984	Not DEG
ENSG00000198626	Not DEG
ENSG00000116996	Not DEG
ENSG00000270188	Not DEG
ENSG00000133019	Not DEG
ENSG00000155816	Not DEG
ENSG00000180875	Not DEG
ENSG00000182901	Not DEG
ENSG00000091483	Not DEG
ENSG00000054277	Not DEG
ENSG00000203668	Not DEG
ENSG00000174371	Not DEG
ENSG00000197769	Not DEG
ENSG00000180287	Not DEG
ENSG00000143702	Not DEG
ENSG00000054282	Not DEG
ENSG00000117020	Not DEG
ENSG00000179456	Not DEG
ENSG00000268146	Not DEG
ENSG00000035687	Not DEG
ENSG00000179397	Not DEG
ENSG00000121644	Not DEG
ENSG00000203667	Not DEG
ENSG00000153187	Not DEG
ENSG00000272195	Not DEG
ENSG00000203666	Not DEG
ENSG00000162849	Not DEG
ENSG00000185420	Not DEG
ENSG00000162851	Not DEG
ENSG00000162852	Not DEG
ENSG00000143653	Not DEG
ENSG00000153207	Not DEG
ENSG00000135747	Not DEG
ENSG00000197472	Not DEG
ENSG00000188295	Not DEG
ENSG00000221953	Not DEG
ENSG00000196418	Not DEG
ENSG00000162714	Not DEG
ENSG00000162711	Not DEG
ENSG00000162722	Not DEG
ENSG00000238243	Not DEG
ENSG00000177462	Not DEG
ENSG00000175137	Not DEG
ENSG00000171161	Not DEG
ENSG00000171163	Not DEG
ENSG00000185220	Not DEG
ENSG00000173876	Not DEG
ENSG00000015171	Not DEG
ENSG00000151240	Not DEG
ENSG00000107929	Not DEG
ENSG00000107937	Not DEG
ENSG00000148377	Not DEG
ENSG00000067064	Not DEG
ENSG00000047056	Not DEG
ENSG00000185736	Not DEG
ENSG00000067057	Not DEG
ENSG00000107959	Not DEG
ENSG00000067082	Not DEG
ENSG00000165568	Not DEG
ENSG00000187134	Not DEG
ENSG00000151632	Not DEG
ENSG00000196139	Not DEG
ENSG00000173848	Not DEG
ENSG00000196372	Not DEG
ENSG00000108021	Not DEG
ENSG00000057608	Not DEG
ENSG00000134461	Not DEG
ENSG00000134452	Not DEG
ENSG00000134470	Not DEG
ENSG00000134453	Not DEG
ENSG00000170525	Not DEG
ENSG00000065675	Not DEG
ENSG00000198879	Not DEG
ENSG00000123243	Not DEG
ENSG00000151657	Not DEG
ENSG00000165629	Not DEG
ENSG00000165632	Not DEG
ENSG00000107485	Not DEG
ENSG00000048740	Not DEG
ENSG00000148429	Not DEG
ENSG00000134463	Not DEG
ENSG00000148426	Not DEG
ENSG00000151461	Not DEG
ENSG00000181192	Not DEG
ENSG00000065665	Not DEG
ENSG00000165609	Not DEG
ENSG00000151465	Not DEG
ENSG00000183049	Not DEG
ENSG00000151468	Not DEG
ENSG00000123240	Not DEG
ENSG00000065328	Not DEG
ENSG00000165623	Not DEG
ENSG00000107537	Not DEG
ENSG00000086475	Not DEG
ENSG00000165626	Not DEG
ENSG00000165630	Not DEG
ENSG00000239665	Not DEG
ENSG00000151474	Not DEG
ENSG00000065809	Not DEG
ENSG00000185267	Not DEG
ENSG00000187522	Not DEG
ENSG00000152455	Not DEG
ENSG00000152457	Not DEG
ENSG00000197889	Not DEG
ENSG00000176244	Not DEG
ENSG00000176236	Not DEG
ENSG00000152464	Not DEG
ENSG00000152465	Not DEG
ENSG00000148468	Not DEG
ENSG00000077943	Not DEG
ENSG00000148481	Not DEG
ENSG00000165983	Not DEG
ENSG00000165985	Not DEG
ENSG00000148484	Not DEG
ENSG00000107611	Not DEG
ENSG00000107614	Not DEG
ENSG00000026025	Not DEG
ENSG00000148488	Not DEG
ENSG00000165996	Not DEG
ENSG00000136738	Not DEG
ENSG00000165995	Not DEG
ENSG00000241058	Not DEG
ENSG00000271786	Not DEG
ENSG00000165997	Not DEG
ENSG00000204740	Not DEG
ENSG00000120594	Not DEG
ENSG00000078114	Not DEG
ENSG00000204682	Not DEG
ENSG00000180592	Not DEG
ENSG00000078403	Not DEG
ENSG00000136770	Not DEG
ENSG00000148444	Not DEG
ENSG00000168283	Not DEG
ENSG00000077327	Not DEG
ENSG00000150867	Not DEG
ENSG00000165309	Not DEG
ENSG00000148450	Not DEG
ENSG00000179133	Not DEG
ENSG00000165312	Not DEG
ENSG00000120549	Not DEG
ENSG00000107863	Not DEG
ENSG00000099256	Not DEG
ENSG00000151023	Not DEG
ENSG00000185875	Not DEG
ENSG00000151025	Not DEG
ENSG00000095777	Not DEG
ENSG00000136750	Not DEG
ENSG00000148459	Not DEG
ENSG00000136754	Not DEG
ENSG00000107890	Not DEG
ENSG00000136758	Not DEG
ENSG00000120539	Not DEG
ENSG00000107897	Not DEG
ENSG00000099246	Not DEG
ENSG00000150051	Not DEG
ENSG00000169126	Not DEG
ENSG00000150054	Not DEG
ENSG00000095787	Not DEG
ENSG00000095739	Not DEG
ENSG00000197321	Not DEG
ENSG00000165757	Not DEG
ENSG00000107951	Not DEG
ENSG00000107968	Not DEG
ENSG00000183621	Not DEG
ENSG00000148516	Not DEG
ENSG00000165322	Not DEG
ENSG00000170759	Not DEG
ENSG00000120616	Not DEG
ENSG00000216937	Not DEG
ENSG00000150093	Not DEG
ENSG00000099250	Not DEG
ENSG00000148498	Not DEG
ENSG00000108094	Not DEG
ENSG00000095794	Not DEG
ENSG00000108100	Not DEG
ENSG00000177283	Not DEG
ENSG00000229644	Not DEG
ENSG00000148513	Not DEG
ENSG00000256892	Not DEG
ENSG00000198105	Not DEG
ENSG00000175395	Not DEG
ENSG00000189180	Not DEG
ENSG00000075407	Not DEG
ENSG00000225119	Not DEG
ENSG00000196693	Not DEG
ENSG00000165733	Not DEG
ENSG00000165731	Not DEG
ENSG00000169826	Not DEG
ENSG00000198915	Not DEG
ENSG00000169813	Not DEG
ENSG00000243660	Not DEG
ENSG00000196793	Not DEG
ENSG00000198298	Not DEG
ENSG00000169740	Not DEG
ENSG00000107562	Not DEG
ENSG00000107551	Not DEG
ENSG00000165507	Not DEG
ENSG00000165511	Not DEG
ENSG00000165512	Not DEG
ENSG00000012779	Not DEG
ENSG00000165406	Not DEG
ENSG00000172671	Not DEG
ENSG00000172661	Not DEG
ENSG00000188234	Not DEG
ENSG00000204176	Not DEG
ENSG00000204175	Not DEG
ENSG00000204172	Not DEG
ENSG00000152726	Not DEG
ENSG00000198035	Not DEG
ENSG00000165388	Not DEG
ENSG00000107623	Not DEG
ENSG00000170324	Not DEG
ENSG00000107643	Not DEG
ENSG00000128805	Not DEG
ENSG00000128815	Not DEG
ENSG00000165633	Not DEG
ENSG00000204161	Not DEG
ENSG00000225830	Not DEG
ENSG00000197444	Not DEG
ENSG00000227345	Not DEG
ENSG00000174196	Not DEG
ENSG00000174194	Not DEG
ENSG00000204152	Not DEG
ENSG00000138293	Not DEG
ENSG00000138297	Not DEG
ENSG00000204149	Not DEG
ENSG00000099290	Not DEG
ENSG00000188611	Not DEG
ENSG00000198964	Not DEG
ENSG00000204147	Not DEG
ENSG00000185532	Not DEG
ENSG00000177613	Not DEG
ENSG00000107984	Not DEG
ENSG00000150275	Not DEG
ENSG00000249860	Not DEG
ENSG00000122952	Not DEG
ENSG00000151151	Not DEG
ENSG00000122873	Not DEG
ENSG00000072401	Not DEG
ENSG00000108064	Not DEG
ENSG00000122870	Not DEG
ENSG00000165443	Not DEG
ENSG00000148541	Not DEG
ENSG00000165449	Not DEG
ENSG00000108091	Not DEG
ENSG00000235931	Not DEG
ENSG00000151150	Not DEG
ENSG00000170312	Not DEG
ENSG00000072422	Not DEG
ENSG00000196932	Not DEG
ENSG00000183346	Not DEG
ENSG00000150347	Not DEG
ENSG00000182010	Not DEG
ENSG00000138311	Not DEG
ENSG00000181915	Not DEG
ENSG00000122877	Not DEG
ENSG00000148572	Not DEG
ENSG00000171988	Not DEG
ENSG00000165476	Not DEG
ENSG00000183230	Not DEG
ENSG00000198739	Not DEG
ENSG00000108176	Not DEG
ENSG00000096717	Not DEG
ENSG00000148634	Not DEG
ENSG00000138347	Not DEG
ENSG00000179774	Not DEG
ENSG00000108187	Not DEG
ENSG00000096746	Not DEG
ENSG00000204130	Not DEG
ENSG00000138346	Not DEG
ENSG00000122912	Not DEG
ENSG00000138336	Not DEG
ENSG00000060339	Not DEG
ENSG00000165730	Not DEG
ENSG00000107625	Not DEG
ENSG00000165732	Not DEG
ENSG00000198954	Not DEG
ENSG00000122958	Not DEG
ENSG00000156502	Not DEG
ENSG00000156510	Not DEG
ENSG00000156515	Not DEG
ENSG00000075073	Not DEG
ENSG00000099282	Not DEG
ENSG00000171224	Not DEG
ENSG00000197467	Not DEG
ENSG00000099284	Not DEG
ENSG00000042286	Not DEG
ENSG00000156521	Not DEG
ENSG00000079332	Not DEG
[truncated: 14,366 more rows]
