# Supplementary material for: Modeling expression ranks for noise-tolerant differential expression analysis of scRNA-seq data
Source: HighWire-hosted journal article supplement (doi:10.1101/gr.267070.120), 2021-03-05
Supplement: Supplemental_Table_S5.xlsx [file Supplemental_Table_S5.xlsx]

## Sheet: Chu Bulk Dataset (H1 vs. H9)
Supplemental Table S5: Bulk based DEG calls for the Chu dataset (replicates H1 vs. H9).
Gene Symbol	DEG Call
NKX2-5	DEG
SLC26A10	DEG
GABRA1	DEG
SOWAHA	DEG
SIX6	DEG
MYH2	DEG
CSRP1	DEG
FOXL1	DEG
NKX3-2	DEG
PRRX1	DEG
IZUMO2	DEG
SPATA16	DEG
ACE2	DEG
PRSS21	DEG
CSMD1	DEG
SDR42E1	DEG
C6orf201	DEG
RBPJL	DEG
CAT	DEG
MT1H	DEG
RTP1	DEG
CSTA	DEG
MCCC2	DEG
USP9Y	DEG
FPR2	DEG
ESRRB	DEG
SOX14	DEG
MAGEA4	DEG
VGLL2	DEG
ZFY	DEG
THNSL2	DEG
COX7A1	DEG
NPPA	DEG
CD48	DEG
SP140	DEG
SLCO1B1	DEG
TMSB4Y	DEG
CALHM3	DEG
SLC12A1	DEG
SLC5A4	DEG
OR52A1	DEG
FOXA2	DEG
HIST1H1A	DEG
TCL1A	DEG
GH2	DEG
HIST1H3C	DEG
P2RX1	DEG
SULT2B1	DEG
AMICA1	DEG
AGAP4	DEG
MAMDC4	DEG
PKD2L1	DEG
ORM1	DEG
PON1	DEG
ADRB3	DEG
SLITRK6	DEG
ZNF667	DEG
UTY	DEG
DDX3Y	DEG
RPS4Y1	DEG
KDM5D	DEG
NLRP2	DEG
CYP4F11	DEG
PEG3	DEG
A2M	DEG
MCI	DEG
CR1L	DEG
TRDN	DEG
KIF25	DEG
MEF2B	DEG
LTF	DEG
HGC6.3	DEG
MKL2	Not DEG
CD109	Not DEG
ABTB1	Not DEG
MAST2	Not DEG
KAT5	Not DEG
WWC2	Not DEG
CD163	Not DEG
UBE2Z	Not DEG
RGPD4	Not DEG
PHYHIPL	Not DEG
ELF2	Not DEG
RAB14	Not DEG
CDH1	Not DEG
IZUMO1	Not DEG
TMIE	Not DEG
PRDX2	Not DEG
APOA2	Not DEG
AQP4	Not DEG
PSMC6	Not DEG
SLC2A8	Not DEG
MKNK1	Not DEG
C12orf4	Not DEG
CPLX1	Not DEG
SUV39H1	Not DEG
USF1	Not DEG
R3HDM2	Not DEG
USP29	Not DEG
TMPPE	Not DEG
HIST1H2BC	Not DEG
TTLL2	Not DEG
GBP5	Not DEG
ALG5	Not DEG
DBNDD1	Not DEG
RBP1	Not DEG
ITGA5	Not DEG
SNX5	Not DEG
ANKRD16	Not DEG
GTSE1	Not DEG
KCNIP2	Not DEG
STX2	Not DEG
TRIM23	Not DEG
RSPH9	Not DEG
CAMK2N1	Not DEG
CLCC1	Not DEG
CNFN	Not DEG
ZMYND8	Not DEG
MAP1A	Not DEG
CPXM1	Not DEG
XPA	Not DEG
RAB3IP	Not DEG
NDUFAF2	Not DEG
SRCAP	Not DEG
TAT	Not DEG
OTOP1	Not DEG
TNNT2	Not DEG
H2AFJ	Not DEG
RRAS2	Not DEG
PF4V1	Not DEG
GSDMD	Not DEG
TMEM55A	Not DEG
DUSP12	Not DEG
EFHB	Not DEG
DCTPP1	Not DEG
FBXL17	Not DEG
ETV1	Not DEG
NDUFV2	Not DEG
TRPC1	Not DEG
CLSPN	Not DEG
PSMD14	Not DEG
DDI2	Not DEG
IAH1	Not DEG
WNT5A	Not DEG
GPR84	Not DEG
TNC	Not DEG
SEZ6L	Not DEG
ARFIP2	Not DEG
DTX3L	Not DEG
PIP5K1A	Not DEG
LITAF	Not DEG
MMEL1	Not DEG
FBXO41	Not DEG
HTR1D	Not DEG
HBP1	Not DEG
VAMP2	Not DEG
ZNF687	Not DEG
MEX3C	Not DEG
PCDH11X	Not DEG
SOCS6	Not DEG
OSGEPL1	Not DEG
ITGB4	Not DEG
HERC3	Not DEG
CROT	Not DEG
ANKRD36B	Not DEG
ARHGAP31	Not DEG
CCDC121	Not DEG
HSPA9	Not DEG
CASP3	Not DEG
XYLT2	Not DEG
WWTR1	Not DEG
GGT5	Not DEG
THRSP	Not DEG
ERCC3	Not DEG
TLL2	Not DEG
RAVER2	Not DEG
PGAP2	Not DEG
TXNDC11	Not DEG
SUOX	Not DEG
DNM2	Not DEG
GNB2	Not DEG
KLK6	Not DEG
CENPJ	Not DEG
CLSTN2	Not DEG
MTRNR2L6	Not DEG
TRIM44	Not DEG
NCOA3	Not DEG
GPC3	Not DEG
NAGK	Not DEG
SLC12A5	Not DEG
CD200R1	Not DEG
IGFN1	Not DEG
MED6	Not DEG
ORC6	Not DEG
FAM131B	Not DEG
PRELP	Not DEG
TRAPPC12	Not DEG
SLC25A38	Not DEG
WHSC1L1	Not DEG
PLAGL2	Not DEG
MYD88	Not DEG
HLX	Not DEG
HSH2D	Not DEG
IL1RAPL1	Not DEG
SLC38A4	Not DEG
ZNF281	Not DEG
DCP2	Not DEG
LSM11	Not DEG
ERRFI1	Not DEG
PRH2	Not DEG
AGTRAP	Not DEG
C3orf71	Not DEG
PHF13	Not DEG
PITPNC1	Not DEG
KRT10	Not DEG
CXorf26	Not DEG
FABP5	Not DEG
MMP23B	Not DEG
DLX2	Not DEG
FGD1	Not DEG
APBB1	Not DEG
LEAP2	Not DEG
GLO1	Not DEG
RGS14	Not DEG
GABRB3	Not DEG
LAMP2	Not DEG
NCL	Not DEG
RCSD1	Not DEG
TTC28	Not DEG
HNRNPH3	Not DEG
RUSC2	Not DEG
POLR3GL	Not DEG
RAF1	Not DEG
UBXN4	Not DEG
OVOL1	Not DEG
SYS1	Not DEG
FAM108C1	Not DEG
GPC6	Not DEG
RUFY3	Not DEG
SPTSSB	Not DEG
WIPF3	Not DEG
ANG	Not DEG
ARHGAP24	Not DEG
NFE2L3	Not DEG
C9orf91	Not DEG
DEGS1	Not DEG
MEN1	Not DEG
COIL	Not DEG
TMEM116	Not DEG
ZNF3	Not DEG
HCRT	Not DEG
ICAM2	Not DEG
CXCR6	Not DEG
GJD4	Not DEG
FBXW10	Not DEG
SLC36A1	Not DEG
PCDHB9	Not DEG
HIST1H2BF	Not DEG
STOX1	Not DEG
C14orf129	Not DEG
DSG3	Not DEG
KDELR1	Not DEG
PCDHB6	Not DEG
KPNA2	Not DEG
ZNF705D	Not DEG
AEBP2	Not DEG
RAB32	Not DEG
ITGA2B	Not DEG
CDHR4	Not DEG
ARID5B	Not DEG
RFC2	Not DEG
ZFP1	Not DEG
SLC5A9	Not DEG
PKP3	Not DEG
IRS2	Not DEG
ATP12A	Not DEG
MUL1	Not DEG
CPA6	Not DEG
JAM2	Not DEG
KATNB1	Not DEG
AUH	Not DEG
ZNF226	Not DEG
AP4M1	Not DEG
TMEM130	Not DEG
ATP6V1B2	Not DEG
AGBL3	Not DEG
RCOR3	Not DEG
ZBTB25	Not DEG
HPCAL4	Not DEG
RPL27	Not DEG
PLEKHJ1	Not DEG
ADH5	Not DEG
COL4A6	Not DEG
CCT5	Not DEG
SPRYD7	Not DEG
TSTD1	Not DEG
SH3GL1	Not DEG
MRPS24	Not DEG
TLR3	Not DEG
SLCO1A2	Not DEG
CD300LG	Not DEG
VASP	Not DEG
GPSM3	Not DEG
EFNA4	Not DEG
KCNA6	Not DEG
CHMP4A	Not DEG
NEK3	Not DEG
RNF41	Not DEG
MTHFD2	Not DEG
COX6C	Not DEG
FAM82A1	Not DEG
G6PD	Not DEG
UBE3B	Not DEG
PPARA	Not DEG
PRKCQ	Not DEG
CKS2	Not DEG
ARHGAP44	Not DEG
ACTR8	Not DEG
GRAMD2	Not DEG
SEPSECS	Not DEG
ANXA4	Not DEG
MRPS15	Not DEG
ITGA10	Not DEG
JKAMP	Not DEG
PRR5	Not DEG
ASNA1	Not DEG
FBXO28	Not DEG
LRRTM2	Not DEG
AARS	Not DEG
FOSL1	Not DEG
PKHD1	Not DEG
TMEM229A	Not DEG
ART5	Not DEG
LOC646851	Not DEG
DPY19L3	Not DEG
NT5C1B	Not DEG
LDLRAD3	Not DEG
ABHD10	Not DEG
STAMBP	Not DEG
ALKBH8	Not DEG
RNF166	Not DEG
ZNF835	Not DEG
EPX	Not DEG
GOLT1B	Not DEG
PPFIA3	Not DEG
GRIK3	Not DEG
NXF2	Not DEG
JAK1	Not DEG
DGCR14	Not DEG
PPIF	Not DEG
DHRS7B	Not DEG
TPTE	Not DEG
RNF187	Not DEG
MON1B	Not DEG
CYTIP	Not DEG
COQ6	Not DEG
GULP1	Not DEG
C4orf46	Not DEG
ZDHHC23	Not DEG
PDE4B	Not DEG
GDI2	Not DEG
LAMA5	Not DEG
NFAT5	Not DEG
RNMT	Not DEG
SLC39A8	Not DEG
ODZ2	Not DEG
2020-03-11	Not DEG
MSL3	Not DEG
TUBB2B	Not DEG
INSR	Not DEG
ZMYND11	Not DEG
HNRNPA0	Not DEG
C19orf70	Not DEG
PCNP	Not DEG
ANKRD23	Not DEG
CLCN2	Not DEG
C1orf192	Not DEG
ACSM2A	Not DEG
SEMA4D	Not DEG
WDFY3	Not DEG
GOLGA8B	Not DEG
CBX5	Not DEG
RAPGEF4	Not DEG
SLC25A37	Not DEG
NXT2	Not DEG
PTGER3	Not DEG
GMDS	Not DEG
TMEM51	Not DEG
HGSNAT	Not DEG
ASCC1	Not DEG
INPP5A	Not DEG
ANTXR2	Not DEG
SLC2A14	Not DEG
FAM48B2	Not DEG
PTH2R	Not DEG
RPS6KA2	Not DEG
STAMBPL1	Not DEG
NEK8	Not DEG
KLK7	Not DEG
C8orf76	Not DEG
NDUFA7	Not DEG
FGF21	Not DEG
SCAND1	Not DEG
MAP3K4	Not DEG
MAPRE1	Not DEG
PRAM1	Not DEG
TBC1D16	Not DEG
MAP9	Not DEG
SLC25A3	Not DEG
CWF19L2	Not DEG
TMEM9	Not DEG
FLRT1	Not DEG
GYLTL1B	Not DEG
GPM6B	Not DEG
GJC3	Not DEG
SKP1	Not DEG
CNBP	Not DEG
TROAP	Not DEG
SLC23A2	Not DEG
RPL31	Not DEG
CCNH	Not DEG
PRSS55	Not DEG
ACBD3	Not DEG
CTAGE15P	Not DEG
CDCP2	Not DEG
PRDM10	Not DEG
EBF4	Not DEG
ZNF707	Not DEG
TMEM41A	Not DEG
TEKT3	Not DEG
TNXB	Not DEG
ARID4A	Not DEG
EIF4B	Not DEG
TARBP1	Not DEG
GABRA2	Not DEG
MMP15	Not DEG
IL12A	Not DEG
NANOG	Not DEG
ARL10	Not DEG
PAPOLG	Not DEG
PIGF	Not DEG
TNNC2	Not DEG
CCDC86	Not DEG
SDK2	Not DEG
GTF2IRD2B	Not DEG
GPR110	Not DEG
C5orf24	Not DEG
SNX3	Not DEG
C1orf111	Not DEG
SNX2	Not DEG
KCNE3	Not DEG
ENTPD6	Not DEG
ZNF549	Not DEG
HNRNPK	Not DEG
GSTA1	Not DEG
SRGAP3	Not DEG
ST3GAL6	Not DEG
ZNF583	Not DEG
MID2	Not DEG
ODZ1	Not DEG
MSANTD1	Not DEG
CNEP1R1	Not DEG
TNRC6A	Not DEG
ARIH2	Not DEG
FAM213B	Not DEG
ATP1B4	Not DEG
NR0B2	Not DEG
DCAF16	Not DEG
SEPW1	Not DEG
GNAT2	Not DEG
SPATA17	Not DEG
THRB	Not DEG
TAPBP	Not DEG
CHMP3	Not DEG
PHF1	Not DEG
RNF128	Not DEG
VCPIP1	Not DEG
TXNDC2	Not DEG
C19orf76	Not DEG
DERL1	Not DEG
CXCL6	Not DEG
ENAH	Not DEG
ARL5B	Not DEG
PHC3	Not DEG
CECR6	Not DEG
MIER3	Not DEG
DOK6	Not DEG
SIT1	Not DEG
TMEM110	Not DEG
PLVAP	Not DEG
PROM1	Not DEG
SLC29A2	Not DEG
TNFRSF21	Not DEG
PPP1CB	Not DEG
SPATA6	Not DEG
USP19	Not DEG
EXOC3L4	Not DEG
PNPO	Not DEG
C16orf59	Not DEG
ZNF718	Not DEG
VN1R1	Not DEG
KBTBD8	Not DEG
SUPT4H1	Not DEG
PALM3	Not DEG
FAM171B	Not DEG
WDR27	Not DEG
JAK2	Not DEG
SYDE2	Not DEG
FAM101A	Not DEG
SMEK1	Not DEG
C2orf63	Not DEG
HNRNPA1L2	Not DEG
NR4A2	Not DEG
GJB7	Not DEG
GSPT2	Not DEG
CCDC51	Not DEG
C16orf57	Not DEG
STC2	Not DEG
ACTR1B	Not DEG
SLC7A3	Not DEG
PMFBP1	Not DEG
NPR2	Not DEG
SEC24A	Not DEG
PFN2	Not DEG
CACNA1S	Not DEG
CAPZA2	Not DEG
FBLN2	Not DEG
SMARCB1	Not DEG
PHC2	Not DEG
MEX3D	Not DEG
MAP7D1	Not DEG
TNFRSF10B	Not DEG
KCNT1	Not DEG
SMARCA4	Not DEG
IFNAR2	Not DEG
HGF	Not DEG
STON1-GTF2A1L	Not DEG
MTM1	Not DEG
BAX	Not DEG
PLCG1	Not DEG
STARD3	Not DEG
BTBD6	Not DEG
ZNF674	Not DEG
ZNF575	Not DEG
LOC649330	Not DEG
UBLCP1	Not DEG
DPP10	Not DEG
ACTL6A	Not DEG
KRCC1	Not DEG
PELI2	Not DEG
RNF123	Not DEG
RLF	Not DEG
NQO2	Not DEG
C11orf95	Not DEG
KLRD1	Not DEG
PKIG	Not DEG
DZIP1L	Not DEG
DRD3	Not DEG
ACBD7	Not DEG
METTL11A	Not DEG
HYLS1	Not DEG
PXDC1	Not DEG
MT1G	Not DEG
ADAD2	Not DEG
SLC6A18	Not DEG
TMEM208	Not DEG
BRPF3	Not DEG
IRF2BP2	Not DEG
NKD1	Not DEG
ESYT2	Not DEG
TBC1D5	Not DEG
GLB1L2	Not DEG
IFI35	Not DEG
H2AFZ	Not DEG
DCAF13	Not DEG
NAPA	Not DEG
SNX10	Not DEG
CCBP2	Not DEG
CHP	Not DEG
LDHAL6A	Not DEG
PLOD2	Not DEG
FAM21A	Not DEG
HNRNPUL1	Not DEG
PRSS16	Not DEG
BCL2L11	Not DEG
IZUMO4	Not DEG
BICC1	Not DEG
TBL3	Not DEG
DDX51	Not DEG
RIN1	Not DEG
ZNF841	Not DEG
EDAR	Not DEG
PLXNB3	Not DEG
ASPM	Not DEG
CYTH4	Not DEG
OXA1L	Not DEG
TAF7	Not DEG
SLC13A4	Not DEG
TPM2	Not DEG
C12orf26	Not DEG
CUL1	Not DEG
POLR2J	Not DEG
CXorf40B	Not DEG
CD63	Not DEG
FAM13B	Not DEG
RBM34	Not DEG
POC1B	Not DEG
SLC38A5	Not DEG
KIAA1109	Not DEG
ELP3	Not DEG
COX6B2	Not DEG
TUBD1	Not DEG
ZBED6	Not DEG
NT5DC2	Not DEG
AZU1	Not DEG
APOL6	Not DEG
PDDC1	Not DEG
ARHGAP22	Not DEG
KIAA1407	Not DEG
KLF10	Not DEG
OR2A25	Not DEG
HHAT	Not DEG
LILRB5	Not DEG
CCHCR1	Not DEG
MORN4	Not DEG
NIN	Not DEG
CCNB3	Not DEG
RPL39L	Not DEG
MIS12	Not DEG
KDM4D	Not DEG
TRAM1L1	Not DEG
MFSD4	Not DEG
SH3BP2	Not DEG
JAKMIP2	Not DEG
MARK4	Not DEG
PLSCR2	Not DEG
SUGP1	Not DEG
FAT3	Not DEG
AGPAT5	Not DEG
DDX18	Not DEG
BNC1	Not DEG
HTR1A	Not DEG
FAM53A	Not DEG
TNFAIP8	Not DEG
TM6SF1	Not DEG
CHD4	Not DEG
SLC22A31	Not DEG
FTH1	Not DEG
PTPRM	Not DEG
MEF2C	Not DEG
SYNPO2	Not DEG
RPL3	Not DEG
DAB1	Not DEG
ATP2C2	Not DEG
EYS	Not DEG
SH3BP1	Not DEG
RBP4	Not DEG
SPTSSA	Not DEG
PNISR	Not DEG
CHIC1	Not DEG
MYBL1	Not DEG
NPFF	Not DEG
RPS23	Not DEG
PNCK	Not DEG
C10orf57	Not DEG
MSX2	Not DEG
ZNFX1	Not DEG
CAMSAP3	Not DEG
CREB3L2	Not DEG
ISM2	Not DEG
KLRK1	Not DEG
DMXL1	Not DEG
ITFG1	Not DEG
PDE12	Not DEG
WIPF1	Not DEG
BSPRY	Not DEG
GRM2	Not DEG
ALDH9A1	Not DEG
FAM123A	Not DEG
ROBO2	Not DEG
OBFC1	Not DEG
RPS6	Not DEG
ARL9	Not DEG
UBP1	Not DEG
ZWINT	Not DEG
SERPINI2	Not DEG
POLR1C	Not DEG
ARL15	Not DEG
CEBPE	Not DEG
SSH3	Not DEG
PPP1R10	Not DEG
SERINC2	Not DEG
PCDHA9	Not DEG
TRIM62	Not DEG
PRPF38B	Not DEG
DLX4	Not DEG
CENPL	Not DEG
MYOM1	Not DEG
APOL4	Not DEG
TACC2	Not DEG
ZNF195	Not DEG
ATP8B1	Not DEG
ZNF84	Not DEG
EPHA2	Not DEG
ACPL2	Not DEG
DHX36	Not DEG
TUBB1	Not DEG
ADPGK	Not DEG
C1orf162	Not DEG
EEF1D	Not DEG
PARP3	Not DEG
TSN	Not DEG
NBPF7	Not DEG
APEX1	Not DEG
FNDC1	Not DEG
TPST1	Not DEG
CIC	Not DEG
PPP4C	Not DEG
NKG7	Not DEG
TEAD1	Not DEG
CTH	Not DEG
RPS6KB2	Not DEG
RBPJ	Not DEG
RUNX1	Not DEG
SMARCC2	Not DEG
ANAPC2	Not DEG
BHMT2	Not DEG
APOPT1	Not DEG
HIST1H4E	Not DEG
C11orf88	Not DEG
RPS11	Not DEG
AVPI1	Not DEG
GDNF	Not DEG
THRAP3	Not DEG
CHRM2	Not DEG
USP3	Not DEG
RORC	Not DEG
IKZF2	Not DEG
HDAC10	Not DEG
EXD2	Not DEG
IDH3G	Not DEG
IMPAD1	Not DEG
CALHM2	Not DEG
SMOC1	Not DEG
ARL17A	Not DEG
NHP2	Not DEG
BSG	Not DEG
PTHLH	Not DEG
CYP20A1	Not DEG
DNAJC12	Not DEG
TXLNA	Not DEG
GLUD1	Not DEG
FRA10AC1	Not DEG
OAZ3	Not DEG
C1QTNF9	Not DEG
SCO1	Not DEG
LOC100130705	Not DEG
RPS4X	Not DEG
RCE1	Not DEG
COL18A1	Not DEG
SF3B14	Not DEG
UBN1	Not DEG
MCART6	Not DEG
HIST2H3D	Not DEG
RD3	Not DEG
KLF1	Not DEG
ADAMTS18	Not DEG
SERPINB6	Not DEG
SEPT14	Not DEG
DOK5	Not DEG
MIS18BP1	Not DEG
NRXN1	Not DEG
C1orf141	Not DEG
CNTRL	Not DEG
MCM5	Not DEG
OGFOD1	Not DEG
GPR61	Not DEG
MRPL54	Not DEG
UBE2D2	Not DEG
C6orf57	Not DEG
LONRF3	Not DEG
IFIT1B	Not DEG
ALG9	Not DEG
ZNF664-FAM101A	Not DEG
PDK3	Not DEG
ZNF93	Not DEG
PLK4	Not DEG
ALDH16A1	Not DEG
NTRK3	Not DEG
AKT1S1	Not DEG
LTA4H	Not DEG
FLJ22184	Not DEG
RPN2	Not DEG
RPP14	Not DEG
PCDH18	Not DEG
ZNF99	Not DEG
PAK4	Not DEG
SRPK3	Not DEG
AKD1	Not DEG
PER3	Not DEG
NUP133	Not DEG
C21orf56	Not DEG
NUPL2	Not DEG
ACVRL1	Not DEG
NBN	Not DEG
PATZ1	Not DEG
RASL10B	Not DEG
PRSS8	Not DEG
MMP24	Not DEG
ZNF114	Not DEG
GAS2L1	Not DEG
SMAD1	Not DEG
HSD17B11	Not DEG
XPOT	Not DEG
RDH12	Not DEG
PCDHB15	Not DEG
UBE2W	Not DEG
LRRN4	Not DEG
TDGF1	Not DEG
MORC3	Not DEG
DYRK3	Not DEG
GSTZ1	Not DEG
ARHGAP28	Not DEG
SUFU	Not DEG
MIA3	Not DEG
CLCN6	Not DEG
GNPAT	Not DEG
PTGER1	Not DEG
PPID	Not DEG
DRAM1	Not DEG
ARHGAP42	Not DEG
SPINK8	Not DEG
GRHL3	Not DEG
ACRV1	Not DEG
CTTNBP2NL	Not DEG
HDAC11	Not DEG
ZDHHC18	Not DEG
RRP8	Not DEG
HIST1H3B	Not DEG
FAT2	Not DEG
C20orf3	Not DEG
KDM5A	Not DEG
SLC3A2	Not DEG
ATP13A4	Not DEG
MYL12B	Not DEG
DPCR1	Not DEG
2020-03-08	Not DEG
SNX33	Not DEG
NOMO2	Not DEG
BMP8A	Not DEG
CCDC25	Not DEG
GABRA3	Not DEG
ATP2A1	Not DEG
COX17	Not DEG
GZF1	Not DEG
ECI2	Not DEG
RHOBTB2	Not DEG
FAM104B	Not DEG
REN	Not DEG
BAZ2B	Not DEG
CEBPA	Not DEG
LPCAT4	Not DEG
ITPRIPL2	Not DEG
PJA2	Not DEG
NIPAL2	Not DEG
ALPK2	Not DEG
DHX58	Not DEG
NUPR1	Not DEG
GPR62	Not DEG
PSAP	Not DEG
BAMBI	Not DEG
KLF9	Not DEG
ZNF259	Not DEG
HIPK4	Not DEG
HES4	Not DEG
ZC3H8	Not DEG
SQRDL	Not DEG
SMCHD1	Not DEG
ADAMTSL5	Not DEG
DUSP26	Not DEG
LRIF1	Not DEG
FHDC1	Not DEG
NUDT16L1	Not DEG
PI4K2A	Not DEG
FAM162B	Not DEG
SLC15A1	Not DEG
FAM3A	Not DEG
COL11A1	Not DEG
POU3F4	Not DEG
TOPBP1	Not DEG
TMEM25	Not DEG
RGAG1	Not DEG
LRRC19	Not DEG
MAP3K2	Not DEG
CBLL1	Not DEG
MAX	Not DEG
EME2	Not DEG
NDUFB8	Not DEG
IL10RB	Not DEG
NSUN5	Not DEG
PRSS22	Not DEG
MBIP	Not DEG
SPOCK2	Not DEG
NRK	Not DEG
RASSF1	Not DEG
CCNI	Not DEG
OSBPL6	Not DEG
ATP7A	Not DEG
C4orf27	Not DEG
TNFAIP6	Not DEG
MCMBP	Not DEG
RAD18	Not DEG
FAH	Not DEG
TNFSF9	Not DEG
CSAD	Not DEG
SNRPD1	Not DEG
PABPN1	Not DEG
RASSF6	Not DEG
ADRBK1	Not DEG
TSPYL1	Not DEG
FGFBP2	Not DEG
ZNF813	Not DEG
CELF4	Not DEG
POLR1B	Not DEG
ZNF41	Not DEG
BTBD9	Not DEG
FBXL21	Not DEG
RPL5	Not DEG
ANXA1	Not DEG
FLNA	Not DEG
MB21D1	Not DEG
TTLL11	Not DEG
NT5E	Not DEG
LOC375190	Not DEG
RRN3	Not DEG
TMEM168	Not DEG
PPARGC1A	Not DEG
FLOT1	Not DEG
ACTL8	Not DEG
TNS1	Not DEG
C10orf129	Not DEG
METTL7B	Not DEG
SFMBT2	Not DEG
GOSR2	Not DEG
PMS2	Not DEG
XCL1	Not DEG
ECSIT	Not DEG
MT1E	Not DEG
KCNB1	Not DEG
CPSF2	Not DEG
MAMLD1	Not DEG
ADD3	Not DEG
DCAF15	Not DEG
ZDHHC11	Not DEG
SNAPC2	Not DEG
EPB41L3	Not DEG
ADRM1	Not DEG
NREP	Not DEG
PLCXD2	Not DEG
DDX47	Not DEG
N4BP3	Not DEG
FAM114A2	Not DEG
RRAGB	Not DEG
RABGGTA	Not DEG
HEATR3	Not DEG
LCORL	Not DEG
BHLHA15	Not DEG
SH2D4B	Not DEG
TMEM160	Not DEG
DECR1	Not DEG
MGAT1	Not DEG
ITM2B	Not DEG
KIAA0895L	Not DEG
TARS2	Not DEG
LRP5L	Not DEG
WTAP	Not DEG
TMEM87B	Not DEG
GEMIN4	Not DEG
HLTF	Not DEG
HESX1	Not DEG
HSD17B4	Not DEG
PCBP4	Not DEG
TTI2	Not DEG
MED30	Not DEG
TAOK2	Not DEG
TSC1	Not DEG
MRPL35	Not DEG
YIPF5	Not DEG
LNX2	Not DEG
ATP9B	Not DEG
TIMMDC1	Not DEG
MTSS1L	Not DEG
C16orf88	Not DEG
SYNPO	Not DEG
IMPDH1	Not DEG
C6orf52	Not DEG
SAMD10	Not DEG
FGF14	Not DEG
NEFH	Not DEG
H6PD	Not DEG
HMSD	Not DEG
ORC1	Not DEG
TEX14	Not DEG
NFU1	Not DEG
RPL26L1	Not DEG
BLCAP	Not DEG
TMEM229B	Not DEG
ADCY2	Not DEG
TNR	Not DEG
ALDH3A1	Not DEG
MAGEB1	Not DEG
ZBTB7B	Not DEG
TCF3	Not DEG
EPHA7	Not DEG
PPFIA1	Not DEG
B3GALT1	Not DEG
MORC4	Not DEG
PPP1R14D	Not DEG
SLC25A35	Not DEG
C12orf75	Not DEG
ZNF416	Not DEG
LIPH	Not DEG
TNFSF14	Not DEG
SNAP25	Not DEG
RNF222	Not DEG
SLC26A1	Not DEG
BAG4	Not DEG
ST8SIA4	Not DEG
ELF1	Not DEG
NOD2	Not DEG
KIAA1468	Not DEG
ZNF23	Not DEG
FHL3	Not DEG
GRINA	Not DEG
OPRM1	Not DEG
SKP2	Not DEG
LSM10	Not DEG
APITD1	Not DEG
DLGAP1	Not DEG
LOC440335	Not DEG
CTNNBL1	Not DEG
PDPK1	Not DEG
TRIT1	Not DEG
APCDD1	Not DEG
IFIT3	Not DEG
C20orf196	Not DEG
NEK11	Not DEG
CHST7	Not DEG
RAP1B	Not DEG
CISD3	Not DEG
LETM1	Not DEG
CPNE1	Not DEG
B4GALT5	Not DEG
USP2	Not DEG
RPS17	Not DEG
ACAP2	Not DEG
CTSB	Not DEG
TDG	Not DEG
EIF4EBP1	Not DEG
FHIT	Not DEG
UBA52	Not DEG
SNX20	Not DEG
CXCL2	Not DEG
SYVN1	Not DEG
IKBKE	Not DEG
TPT1	Not DEG
PCSK1	Not DEG
CLVS2	Not DEG
IL10	Not DEG
SEPT10	Not DEG
EEF2	Not DEG
TH	Not DEG
PSME1	Not DEG
HIST1H2BO	Not DEG
SIAH2	Not DEG
VPS54	Not DEG
ASB18	Not DEG
PRDX3	Not DEG
ADAM8	Not DEG
NLGN3	Not DEG
BRD7	Not DEG
ZC3H14	Not DEG
ARV1	Not DEG
MAPK8IP3	Not DEG
STAM2	Not DEG
EIF3E	Not DEG
TRAF7	Not DEG
ZNF808	Not DEG
TMEM194B	Not DEG
PCDHB8	Not DEG
FANCM	Not DEG
RRBP1	Not DEG
GRIK2	Not DEG
ZNF234	Not DEG
PSMD11	Not DEG
SETDB1	Not DEG
FAM174B	Not DEG
TSEN34	Not DEG
ZNF124	Not DEG
LRRC73	Not DEG
FUCA1	Not DEG
PPCS	Not DEG
SOCS1	Not DEG
ILDR1	Not DEG
C3orf33	Not DEG
GRAP	Not DEG
THADA	Not DEG
PUS1	Not DEG
SLC24A5	Not DEG
GNG12	Not DEG
BCMO1	Not DEG
ZNF479	Not DEG
ADRA2B	Not DEG
RECK	Not DEG
KIF19	Not DEG
TPST2	Not DEG
MT3	Not DEG
KIF16B	Not DEG
IQSEC3	Not DEG
AMHR2	Not DEG
ARHGAP26	Not DEG
GPX2	Not DEG
GARS	Not DEG
NAGA	Not DEG
RARRES2	Not DEG
HIBCH	Not DEG
RDX	Not DEG
PLXDC2	Not DEG
PIP5K1B	Not DEG
HINT3	Not DEG
EIF4G2	Not DEG
XKR4	Not DEG
LOC100129924	Not DEG
RIMS1	Not DEG
DTX1	Not DEG
KIAA0753	Not DEG
FAM161A	Not DEG
KIAA1429	Not DEG
MOAP1	Not DEG
ZZEF1	Not DEG
AATK	Not DEG
AEN	Not DEG
NEDD9	Not DEG
C17orf58	Not DEG
RIMS2	Not DEG
LETM2	Not DEG
CDS2	Not DEG
BLVRB	Not DEG
SSBP2	Not DEG
TSR1	Not DEG
ADORA2B	Not DEG
HELQ	Not DEG
NDUFS6	Not DEG
MIPEP	Not DEG
EME1	Not DEG
ZNF613	Not DEG
NME1	Not DEG
MAGIX	Not DEG
PP2D1	Not DEG
PLDN	Not DEG
HEATR6	Not DEG
IMPDH2	Not DEG
ZHX1-C8ORF76	Not DEG
KIAA0494	Not DEG
POP5	Not DEG
DISC1	Not DEG
CBR4	Not DEG
PPM1L	Not DEG
HIST1H3F	Not DEG
P2RY1	Not DEG
SSRP1	Not DEG
KIF15	Not DEG
KIAA0391	Not DEG
IDO1	Not DEG
ARNT2	Not DEG
MYB	Not DEG
SLC39A6	Not DEG
C3orf18	Not DEG
CYTH3	Not DEG
ETFDH	Not DEG
CARM1	Not DEG
ZNF341	Not DEG
BTD	Not DEG
CUEDC2	Not DEG
NPRL2	Not DEG
C9orf72	Not DEG
KIAA1644	Not DEG
MPZL3	Not DEG
BEST1	Not DEG
PI15	Not DEG
FBXO42	Not DEG
FAM149B1	Not DEG
USH2A	Not DEG
NSUN6	Not DEG
ALPP	Not DEG
PIK3CA	Not DEG
SOD1	Not DEG
NGEF	Not DEG
FAM210A	Not DEG
UNC5B	Not DEG
MIB1	Not DEG
TRPS1	Not DEG
UPF3B	Not DEG
MAP3K5	Not DEG
TMEM70	Not DEG
ZNF720	Not DEG
MSANTD4	Not DEG
TREX2	Not DEG
NR4A3	Not DEG
HELZ	Not DEG
PAX6	Not DEG
LRCH2	Not DEG
EMX2	Not DEG
FAM199X	Not DEG
SRXN1	Not DEG
ISOC1	Not DEG
TARBP2	Not DEG
AMOTL1	Not DEG
PHEX	Not DEG
BSCL2	Not DEG
PLIN2	Not DEG
TMEM161B	Not DEG
HLA-DPB1	Not DEG
RHOT2	Not DEG
GNA15	Not DEG
ARHGAP40	Not DEG
APC2	Not DEG
FER	Not DEG
MUM1L1	Not DEG
SIRPB1	Not DEG
NNAT	Not DEG
GLIPR2	Not DEG
MRPS36	Not DEG
XKR9	Not DEG
NRSN2	Not DEG
TRAPPC2	Not DEG
LRCH3	Not DEG
KIF4A	Not DEG
LOC388813	Not DEG
SCAMP5	Not DEG
LPCAT1	Not DEG
MGAT3	Not DEG
LRRC4	Not DEG
CALCA	Not DEG
EDEM1	Not DEG
LCA5L	Not DEG
UPP2	Not DEG
CLDN9	Not DEG
MT2A	Not DEG
CYP2A7	Not DEG
SLC46A3	Not DEG
SLC14A2	Not DEG
RAPGEF6	Not DEG
C8orf83	Not DEG
FKBP5	Not DEG
WNT2B	Not DEG
GBA	Not DEG
FOXA3	Not DEG
CNDP2	Not DEG
RNF215	Not DEG
CA5A	Not DEG
CD36	Not DEG
SAA2	Not DEG
H2AFY2	Not DEG
ARHGAP36	Not DEG
FAM160B2	Not DEG
GALNTL6	Not DEG
RALBP1	Not DEG
EFCAB4B	Not DEG
N6AMT1	Not DEG
NISCH	Not DEG
BPGM	Not DEG
UBXN2B	Not DEG
MATN2	Not DEG
AURKAIP1	Not DEG
RPL14	Not DEG
TRIM37	Not DEG
SUMF1	Not DEG
WSCD2	Not DEG
TCF21	Not DEG
CDC73	Not DEG
ZNF658	Not DEG
PPP1R26	Not DEG
RNF112	Not DEG
KCNJ2	Not DEG
FBXO31	Not DEG
PPIL4	Not DEG
NGRN	Not DEG
ANKLE1	Not DEG
GPBP1	Not DEG
SPDYE3	Not DEG
RHEBL1	Not DEG
VIPR1	Not DEG
ERCC1	Not DEG
ZNF676	Not DEG
KCNF1	Not DEG
EPHA1	Not DEG
NIPSNAP3A	Not DEG
PGM5	Not DEG
MRVI1	Not DEG
PRRC1	Not DEG
PER2	Not DEG
RFESD	Not DEG
USP54	Not DEG
SLC10A3	Not DEG
C6orf118	Not DEG
TMEM151A	Not DEG
GH1	Not DEG
LRRTM1	Not DEG
NPHP3	Not DEG
ZNF146	Not DEG
CD24	Not DEG
KLC4	Not DEG
CYB5D2	Not DEG
RAD51D	Not DEG
CNPPD1	Not DEG
IKZF1	Not DEG
HAX1	Not DEG
BTN2A1	Not DEG
KIF9	Not DEG
MRPL12	Not DEG
FREM3	Not DEG
HES6	Not DEG
CRYGC	Not DEG
TLE6	Not DEG
WISP2	Not DEG
ZNF688	Not DEG
FRMD8	Not DEG
TXNDC5	Not DEG
ERMAP	Not DEG
KCNN2	Not DEG
DPYSL5	Not DEG
ANK2	Not DEG
CIT	Not DEG
CCDC12	Not DEG
LRTM1	Not DEG
TMEM108	Not DEG
MRFAP1L1	Not DEG
ADAR	Not DEG
ZNF580	Not DEG
FTCD	Not DEG
SPARC	Not DEG
HUS1	Not DEG
FZD6	Not DEG
C15orf42	Not DEG
CD4	Not DEG
PZP	Not DEG
CELA2A	Not DEG
OTUD1	Not DEG
USP4	Not DEG
GON4L	Not DEG
D4S234E	Not DEG
USP31	Not DEG
ACRBP	Not DEG
CBX8	Not DEG
SAMD1	Not DEG
TGOLN2	Not DEG
EPHB4	Not DEG
GPX1	Not DEG
RBMS3	Not DEG
PARVB	Not DEG
ZNF860	Not DEG
NKRF	Not DEG
FBXO4	Not DEG
TMEM220	Not DEG
OTUB1	Not DEG
MLLT11	Not DEG
SPATA20	Not DEG
LUZP2	Not DEG
FAM65A	Not DEG
ZNF729	Not DEG
FBXO30	Not DEG
FOXN2	Not DEG
GATAD2A	Not DEG
NEUROG2	Not DEG
SURF1	Not DEG
GTPBP4	Not DEG
ZDHHC5	Not DEG
DUSP11	Not DEG
HAUS5	Not DEG
PITRM1	Not DEG
ARL2BP	Not DEG
TGS1	Not DEG
SKAP2	Not DEG
PHKG1	Not DEG
ZIC2	Not DEG
HTR2A	Not DEG
SLC1A1	Not DEG
RTN4R	Not DEG
SLC41A2	Not DEG
MPRIP	Not DEG
UBE3A	Not DEG
OLFML1	Not DEG
ADAMTS3	Not DEG
ABCC5	Not DEG
B3GAT1	Not DEG
KIF4B	Not DEG
APOC4	Not DEG
NDUFB10	Not DEG
ETV4	Not DEG
HMBS	Not DEG
INTS6	Not DEG
WIPI1	Not DEG
ATAD3B	Not DEG
C8ORFK29	Not DEG
FAXC	Not DEG
RAB12	Not DEG
AFAP1L1	Not DEG
FAM129C	Not DEG
FKBP10	Not DEG
ZNF436	Not DEG
ABCG4	Not DEG
EPAS1	Not DEG
ZNF671	Not DEG
C2	Not DEG
KIAA0513	Not DEG
RAP1GAP	Not DEG
MUSTN1	Not DEG
ZKSCAN3	Not DEG
IQUB	Not DEG
TRIM73	Not DEG
SLC16A6	Not DEG
FANCF	Not DEG
NDUFAF3	Not DEG
CDKN1A	Not DEG
FASTKD3	Not DEG
BCL2L14	Not DEG
CALY	Not DEG
C11orf67	Not DEG
LOX	Not DEG
ELTD1	Not DEG
SET	Not DEG
TROVE2	Not DEG
SLC25A30	Not DEG
TP53RK	Not DEG
FAM70A	Not DEG
EMID2	Not DEG
PRPF3	Not DEG
GRM1	Not DEG
KPNA5	Not DEG
ATAD3C	Not DEG
AMN	Not DEG
ATE1	Not DEG
MEX3B	Not DEG
ARFGAP1	Not DEG
G6PC	Not DEG
SENP7	Not DEG
RNF103-CHMP3	Not DEG
ABT1	Not DEG
C9orf69	Not DEG
PPAP2A	Not DEG
GREM1	Not DEG
SHCBP1	Not DEG
C4A	Not DEG
PSMB6	Not DEG
PTPN4	Not DEG
TMEM54	Not DEG
PODXL2	Not DEG
ECHDC1	Not DEG
PHACTR2	Not DEG
FIP1L1	Not DEG
SNAPC5	Not DEG
TIGIT	Not DEG
KIAA0913	Not DEG
RAD51C	Not DEG
MPHOSPH10	Not DEG
RASSF8	Not DEG
ARHGEF12	Not DEG
PRADC1	Not DEG
SRSF5	Not DEG
POMP	Not DEG
TSPAN6	Not DEG
FANK1	Not DEG
RAPGEF1	Not DEG
FXYD6	Not DEG
LOC100293534	Not DEG
CARKD	Not DEG
GAL3ST2	Not DEG
CRX	Not DEG
PVRL3	Not DEG
DAZ2	Not DEG
ZMYM3	Not DEG
PTCHD2	Not DEG
TYW5	Not DEG
PTRH1	Not DEG
TNFRSF13C	Not DEG
FOXF2	Not DEG
MTA2	Not DEG
PMP22	Not DEG
C22orf40	Not DEG
WDR41	Not DEG
ODF3B	Not DEG
PIM1	Not DEG
FAM113B	Not DEG
BTBD17	Not DEG
KCNK12	Not DEG
TMEM120B	Not DEG
ADCK3	Not DEG
TAB3	Not DEG
FAM47E	Not DEG
FAM35A	Not DEG
RRP9	Not DEG
UBTD2	Not DEG
VKORC1	Not DEG
GDAP2	Not DEG
RGS19	Not DEG
PVR	Not DEG
PGBD4	Not DEG
OR2A2	Not DEG
DPH2	Not DEG
PPP1R18	Not DEG
DNAJB8	Not DEG
LCMT2	Not DEG
GLYATL1	Not DEG
DAK	Not DEG
LOC100507050	Not DEG
C7orf63	Not DEG
MKX	Not DEG
MINPP1	Not DEG
ITPRIP	Not DEG
TMEM231	Not DEG
CHCHD8	Not DEG
ZNF423	Not DEG
CCDC76	Not DEG
MAGED4B	Not DEG
C14orf45	Not DEG
KAT7	Not DEG
DNTTIP2	Not DEG
GTF2H5	Not DEG
SLC7A6	Not DEG
TAS1R1	Not DEG
IL11	Not DEG
PRAMEF17	Not DEG
SPTBN2	Not DEG
CKAP2	Not DEG
GNAI3	Not DEG
NCF1	Not DEG
C16orf7	Not DEG
LILRB1	Not DEG
PPL	Not DEG
RIF1	Not DEG
YAE1D1	Not DEG
RAB3IL1	Not DEG
PTGES2	Not DEG
KIAA1383	Not DEG
PWP1	Not DEG
GABRA5	Not DEG
MYO1E	Not DEG
WIPI2	Not DEG
PPRC1	Not DEG
NCAPH2	Not DEG
FAM81A	Not DEG
MRPS28	Not DEG
ZNF37A	Not DEG
ITPK1	Not DEG
CGB8	Not DEG
ERICH1	Not DEG
TCF19	Not DEG
SCAMP3	Not DEG
WSB2	Not DEG
ATP5D	Not DEG
ARL6IP1	Not DEG
SCYL3	Not DEG
PUS7	Not DEG
XIAP	Not DEG
MTL5	Not DEG
C8orf44	Not DEG
DNAJB4	Not DEG
SLU7	Not DEG
PCBP2	Not DEG
HEBP2	Not DEG
LRSAM1	Not DEG
LRTM2	Not DEG
TBC1D7	Not DEG
SPATA8	Not DEG
FDX1L	Not DEG
KCNQ1	Not DEG
FASN	Not DEG
AKAP7	Not DEG
QARS	Not DEG
C22orf46	Not DEG
ZAP70	Not DEG
FGD6	Not DEG
FBXO38	Not DEG
HES2	Not DEG
CHRNA1	Not DEG
C1orf201	Not DEG
SGCD	Not DEG
WNT5B	Not DEG
ELAVL1	Not DEG
CD3EAP	Not DEG
LCTL	Not DEG
RNF207	Not DEG
CLIC1	Not DEG
CYP4F2	Not DEG
TRIM32	Not DEG
IGSF3	Not DEG
HEPHL1	Not DEG
DOLK	Not DEG
ARHGAP8	Not DEG
NALCN	Not DEG
CSRNP1	Not DEG
IFITM2	Not DEG
H2BFWT	Not DEG
LRRC28	Not DEG
SZT2	Not DEG
GNA12	Not DEG
SLC25A41	Not DEG
ESR2	Not DEG
CORO6	Not DEG
PTCD1	Not DEG
ACO2	Not DEG
TRIM38	Not DEG
ALS2CR12	Not DEG
ZNF780A	Not DEG
LOC158434	Not DEG
NOS2	Not DEG
GART	Not DEG
EEF1G	Not DEG
COL22A1	Not DEG
FNDC9	Not DEG
TMEM109	Not DEG
ST13	Not DEG
TRAK1	Not DEG
SLC33A1	Not DEG
CHCHD4	Not DEG
PDE7A	Not DEG
ELMOD2	Not DEG
DUSP9	Not DEG
INTU	Not DEG
MME	Not DEG
LYG2	Not DEG
SEMA5A	Not DEG
TMEM154	Not DEG
NXPH3	Not DEG
TMEM165	Not DEG
GYS2	Not DEG
RPUSD4	Not DEG
TXNDC9	Not DEG
SLC7A8	Not DEG
ALG1L	Not DEG
SOX12	Not DEG
C12orf59	Not DEG
FSD2	Not DEG
COL2A1	Not DEG
KIF1B	Not DEG
URGCP	Not DEG
CERCAM	Not DEG
SLC22A15	Not DEG
MEGF10	Not DEG
MYLIP	Not DEG
SLC6A19	Not DEG
FASTK	Not DEG
PRKAB1	Not DEG
CDC25B	Not DEG
MRPL43	Not DEG
IFT122	Not DEG
SPC25	Not DEG
KDELR3	Not DEG
CGRRF1	Not DEG
CADM4	Not DEG
KLF12	Not DEG
ADH4	Not DEG
NARS	Not DEG
NPFFR2	Not DEG
SYT3	Not DEG
TOB1	Not DEG
DAPP1	Not DEG
MATN4	Not DEG
POMT2	Not DEG
SECISBP2L	Not DEG
AKR1C3	Not DEG
MOCS2	Not DEG
MED14	Not DEG
OR11A1	Not DEG
CDK8	Not DEG
VSIG1	Not DEG
TBC1D10B	Not DEG
ERG	Not DEG
UQCRC1	Not DEG
AMOTL2	Not DEG
PSMD3	Not DEG
MAPK8	Not DEG
ACTL6B	Not DEG
CHRNA9	Not DEG
TCERG1L	Not DEG
HTATIP2	Not DEG
SNAP91	Not DEG
MRPL48	Not DEG
GLS2	Not DEG
TTC23L	Not DEG
DST	Not DEG
JAG1	Not DEG
PTPN2	Not DEG
APC	Not DEG
TUBA3D	Not DEG
NUDT21	Not DEG
MEST	Not DEG
HIF1AN	Not DEG
NLGN4Y	Not DEG
SEC14L5	Not DEG
STBD1	Not DEG
MDH2	Not DEG
ROR2	Not DEG
CBWD5	Not DEG
SENP2	Not DEG
DKKL1	Not DEG
SBF1	Not DEG
DUSP27	Not DEG
DNAJB13	Not DEG
TRMT61A	Not DEG
GLTSCR1	Not DEG
TYW1B	Not DEG
B3GALT5	Not DEG
SCN7A	Not DEG
DMKN	Not DEG
RASGRP2	Not DEG
CSNK1G3	Not DEG
PSD	Not DEG
RPLP1	Not DEG
DARC	Not DEG
FARS2	Not DEG
HN1	Not DEG
FXYD3	Not DEG
TOMM40	Not DEG
PLA2G15	Not DEG
PDZD2	Not DEG
DOCK8	Not DEG
KCTD15	Not DEG
MTRNR2L3	Not DEG
FAM189A1	Not DEG
ACCS	Not DEG
SIRT6	Not DEG
ZNF410	Not DEG
NRBF2	Not DEG
ZNF576	Not DEG
ADARB2	Not DEG
N4BP2	Not DEG
EIF2B2	Not DEG
MELK	Not DEG
NFKBID	Not DEG
YBX2	Not DEG
VGLL4	Not DEG
ETF1	Not DEG
SART1	Not DEG
BEND3	Not DEG
PANK2	Not DEG
PLAC9	Not DEG
SLC22A13	Not DEG
PPP1R15B	Not DEG
RRM1	Not DEG
ELAC1	Not DEG
ZNF19	Not DEG
BMP4	Not DEG
SNAI1	Not DEG
SEC16B	Not DEG
XKR5	Not DEG
SLC25A45	Not DEG
RAD21L1	Not DEG
C2orf56	Not DEG
MSMP	Not DEG
RNF31	Not DEG
CEP104	Not DEG
YY1	Not DEG
IK	Not DEG
HPCA	Not DEG
NOTCH4	Not DEG
PCDH10	Not DEG
FCRL2	Not DEG
GPR124	Not DEG
WDFY1	Not DEG
MAPKBP1	Not DEG
COQ5	Not DEG
CNTN1	Not DEG
CTXN2	Not DEG
NT5C3L	Not DEG
TTC7A	Not DEG
NIPAL3	Not DEG
RNF114	Not DEG
SLC35B3	Not DEG
BEX5	Not DEG
NFYC	Not DEG
ALOX5	Not DEG
SRPR	Not DEG
UPB1	Not DEG
SLC2A1	Not DEG
RBM11	Not DEG
ISCA2	Not DEG
TMEM187	Not DEG
MSH4	Not DEG
BCKDHA	Not DEG
LRRC40	Not DEG
LOC100130357	Not DEG
MRPS21	Not DEG
BHLHE22	Not DEG
FAM110A	Not DEG
UBE2S	Not DEG
JPH3	Not DEG
TMEM89	Not DEG
TFDP1	Not DEG
NRD1	Not DEG
DPM3	Not DEG
ELOVL3	Not DEG
NADKD1	Not DEG
CYP39A1	Not DEG
CRMP1	Not DEG
CSPG4	Not DEG
FBXL4	Not DEG
JMJD7-PLA2G4B	Not DEG
ARHGAP6	Not DEG
IMMP1L	Not DEG
PPP1R1A	Not DEG
PHF3	Not DEG
FAM167B	Not DEG
RHBDF2	Not DEG
UGCG	Not DEG
ZNF254	Not DEG
KCNJ8	Not DEG
C17orf108	Not DEG
XXYLT1	Not DEG
CLDN1	Not DEG
IQCC	Not DEG
GNPTAB	Not DEG
TNIP1	Not DEG
ZNF675	Not DEG
OLIG3	Not DEG
MASP1	Not DEG
R3HDM1	Not DEG
C15orf39	Not DEG
NSDHL	Not DEG
THAP9	Not DEG
NEUROD1	Not DEG
BTNL8	Not DEG
MCM7	Not DEG
HN1L	Not DEG
TBRG4	Not DEG
TIPRL	Not DEG
C16orf55	Not DEG
NKX6-1	Not DEG
ZNF646	Not DEG
DDX58	Not DEG
BBS9	Not DEG
IPO7	Not DEG
MUC6	Not DEG
PSMA8	Not DEG
CDK12	Not DEG
DSCAML1	Not DEG
MYL4	Not DEG
SYT7	Not DEG
C3orf72	Not DEG
PCDHB5	Not DEG
IL3RA	Not DEG
CBR1	Not DEG
COX6A1	Not DEG
C12orf70	Not DEG
AQPEP	Not DEG
DRAP1	Not DEG
CCDC36	Not DEG
C6orf48	Not DEG
POFUT1	Not DEG
MANBAL	Not DEG
DBN1	Not DEG
MYOCD	Not DEG
PARD6A	Not DEG
HNRNPH1	Not DEG
RBM8A	Not DEG
PAK1IP1	Not DEG
MMP10	Not DEG
FAM21C	Not DEG
GTF2I	Not DEG
ASB1	Not DEG
PLEKHB1	Not DEG
TAF4B	Not DEG
HDLBP	Not DEG
IRF8	Not DEG
FIZ1	Not DEG
CWC22	Not DEG
DZIP1	Not DEG
DCLK3	Not DEG
NEFL	Not DEG
TNFAIP8L2	Not DEG
MSN	Not DEG
PAK3	Not DEG
HDX	Not DEG
TNFSF11	Not DEG
TBX1	Not DEG
FOXO4	Not DEG
SRP19	Not DEG
ZFYVE20	Not DEG
PAX3	Not DEG
GSDMC	Not DEG
EHD2	Not DEG
GRPR	Not DEG
PIGZ	Not DEG
NAP1L5	Not DEG
HAO2	Not DEG
SULT1A3	Not DEG
SCGB3A2	Not DEG
NKX2-4	Not DEG
ARL6	Not DEG
NUMBL	Not DEG
BAIAP3	Not DEG
MAL	Not DEG
GLRA4	Not DEG
NPL	Not DEG
FKBP1B	Not DEG
C9orf100	Not DEG
APOBEC3H	Not DEG
CPE	Not DEG
GPRC5D	Not DEG
PLA2G4A	Not DEG
C1R	Not DEG
DNMT1	Not DEG
ZNF471	Not DEG
GIGYF1	Not DEG
PYROXD2	Not DEG
C17orf48	Not DEG
SYT13	Not DEG
UQCRB	Not DEG
TGDS	Not DEG
FBXL19	Not DEG
EEFSEC	Not DEG
C7orf23	Not DEG
LCLAT1	Not DEG
NGLY1	Not DEG
PRAC	Not DEG
FOXH1	Not DEG
SPI1	Not DEG
ATXN7L3	Not DEG
C8orf86	Not DEG
PIK3CB	Not DEG
BTBD18	Not DEG
ANAPC16	Not DEG
ATG12	Not DEG
TRIM66	Not DEG
GFRA1	Not DEG
MFHAS1	Not DEG
KLK12	Not DEG
SEL1L3	Not DEG
FAM156A	Not DEG
SLC35F3	Not DEG
C1QL2	Not DEG
MPP6	Not DEG
UBB	Not DEG
ESCO1	Not DEG
ZC3H18	Not DEG
SFXN1	Not DEG
ERN2	Not DEG
IFIT5	Not DEG
DNAJC4	Not DEG
UST	Not DEG
CREB3L1	Not DEG
F2RL2	Not DEG
INPP5E	Not DEG
ATP13A3	Not DEG
HSPA6	Not DEG
HIST1H4J	Not DEG
CCDC104	Not DEG
ZDHHC2	Not DEG
OR51Q1	Not DEG
DLG4	Not DEG
CAMK1	Not DEG
RERG	Not DEG
EXOC3L2	Not DEG
GM2A	Not DEG
BPIFB4	Not DEG
VWA7	Not DEG
KRTAP13-4	Not DEG
RAB33A	Not DEG
GPATCH2	Not DEG
GLI3	Not DEG
COMMD6	Not DEG
ENTPD2	Not DEG
PDE6G	Not DEG
MYEOV	Not DEG
SPTLC3	Not DEG
NYNRIN	Not DEG
SUPT5H	Not DEG
BNC2	Not DEG
MRPS9	Not DEG
WNT16	Not DEG
NPLOC4	Not DEG
TMSB4X	Not DEG
CYBA	Not DEG
PPHLN1	Not DEG
LPCAT3	Not DEG
UCHL5	Not DEG
HSPA1A	Not DEG
NEGR1	Not DEG
SH3BGRL	Not DEG
USF2	Not DEG
LARS	Not DEG
FGFR3	Not DEG
NIF3L1	Not DEG
TRAP1	Not DEG
TTC29	Not DEG
SCRT2	Not DEG
AP1G2	Not DEG
[truncated: 14,645 more rows]
