# Supplementary material for: Modeling expression ranks for noise-tolerant differential expression analysis of scRNA-seq data
Source: HighWire-hosted journal article supplement (doi:10.1101/gr.267070.120), 2021-03-05
Supplement: Supplemental_Table_S6.xlsx [file Supplemental_Table_S6.xlsx]

## Sheet: Chu Bulk Dataset (H1 vs. NPC)
Supplemental Table S6: Bulk based DEG calls for the Chu dataset (replicates H1 vs. NPC).
Gene Symbol	DEG Call
CDH1	DEG
TMIE	DEG
TNC	DEG
GPC3	DEG
IGFN1	DEG
IL1RAPL1	DEG
GABRB3	DEG
OVOL1	DEG
SPTSSB	DEG
ARHGAP24	DEG
NFE2L3	DEG
C9orf91	DEG
SLC26A10	DEG
STOX1	DEG
PKP3	DEG
HPCAL4	DEG
COL4A6	DEG
FOSL1	DEG
TMEM229A	DEG
NXF2	DEG
ZDHHC23	DEG
GOLGA8B	DEG
STAMBPL1	DEG
PRAM1	DEG
P2RX6	DEG
EBF4	DEG
NANOG	DEG
TNNC2	DEG
SDK2	DEG
GSTA1	DEG
SRGAP3	DEG
THRB	DEG
RNF128	DEG
DOK6	DEG
SIT1	DEG
PLVAP	DEG
FAM101A	DEG
PHC2	DEG
HGF	DEG
STON1-GTF2A1L	DEG
NKD1	DEG
IZUMO4	DEG
AZU1	DEG
KIAA1407	DEG
HHAT	DEG
HTR1A	DEG
MEF2C	DEG
PNCK	DEG
MSX2	DEG
WIPF1	DEG
BSPRY	DEG
RORC	DEG
SMOC1	DEG
LOC100130705	DEG
RD3	DEG
ADAMTS18	DEG
PRSS8	DEG
TDGF1	DEG
GRHL3	DEG
NIPAL2	DEG
ALPK2	DEG
DHX58	DEG
HES4	DEG
COL11A1	DEG
POU3F4	DEG
NRK	DEG
TNFAIP6	DEG
FBXL21	DEG
ANXA1	DEG
SOWAHA	DEG
NT5E	DEG
ACTL8	DEG
MT1E	DEG
KCNB1	DEG
MAMLD1	DEG
ADCY2	DEG
EPHA7	DEG
LIPH	DEG
TH	DEG
SOCS1	DEG
BCMO1	DEG
KIF19	DEG
AMHR2	DEG
RARRES2	DEG
LOC100129924	DEG
IDO1	DEG
PI15	DEG
NR4A3	DEG
PAX6	DEG
EMX2	DEG
GNA15	DEG
APC2	DEG
SIX6	DEG
LOC388813	DEG
CALCA	DEG
CLDN9	DEG
MT2A	DEG
WNT2B	DEG
H2AFY2	DEG
ARHGAP36	DEG
EPHA1	DEG
PGM5	DEG
C6orf118	DEG
TMEM151A	DEG
DPYSL5	DEG
FAM65A	DEG
NEUROG2	DEG
ETV4	DEG
MUSTN1	DEG
BCL2L14	DEG
FAM70A	DEG
GREM1	DEG
FANK1	DEG
LOC100293534	DEG
GAL3ST2	DEG
PMP22	DEG
ODF3B	DEG
MYH2	DEG
LRTM2	DEG
WNT5B	DEG
ARHGAP8	DEG
NALCN	DEG
CORO6	DEG
NOS2	DEG
NXPH3	DEG
COL2A1	DEG
NPPB	DEG
NPFFR2	DEG
MATN4	DEG
ERG	DEG
ACTL6B	DEG
ROR2	DEG
B3GALT5	DEG
RASGRP2	DEG
DARC	DEG
PLAC9	DEG
BMP4	DEG
CNTN1	DEG
BHLHE22	DEG
OLIG3	DEG
NKX6-1	DEG
MYL4	DEG
TNFSF11	DEG
PAX3	DEG
GRPR	DEG
PIGZ	DEG
SCGB3A2	DEG
NKX2-4	DEG
CPE	DEG
PYROXD2	DEG
FOXH1	DEG
GFRA1	DEG
F2RL2	DEG
RERG	DEG
GLI3	DEG
ENTPD2	DEG
PDE6G	DEG
BNC2	DEG
FGFR3	DEG
TTC29	DEG
DUSP5	DEG
NRBP2	DEG
CDH8	DEG
GAS1	DEG
FAM115A	DEG
SLC17A9	DEG
DUSP13	DEG
SLC18B1	DEG
TKTL1	DEG
KIF26B	DEG
BOC	DEG
HERC5	DEG
AHSG	DEG
PSMB8	DEG
ZNF703	DEG
H1F0	DEG
TSPAN18	DEG
ARID3C	DEG
RASD2	DEG
CDH2	DEG
TSLP	DEG
MDGA1	DEG
MATK	DEG
CLEC4A	DEG
EFNB1	DEG
TPPP3	DEG
ADAMTS13	DEG
POU5F1	DEG
EGR3	DEG
WIF1	DEG
UCMA	DEG
HERC6	DEG
FRZB	DEG
AIM1	DEG
FAM125B	DEG
C9orf171	DEG
CXCL5	DEG
WDR93	DEG
PPP1R1B	DEG
TRIB3	DEG
CMPK2	DEG
C16orf11	DEG
TRPM8	DEG
ZNF518B	DEG
MGAM	DEG
PKHD1L1	DEG
PROKR2	DEG
VIL1	DEG
CDH20	DEG
CRABP2	DEG
UGP2	DEG
ESYT3	DEG
CD177	DEG
SFRP5	DEG
WNT8B	DEG
MLLT6	DEG
CLIP3	DEG
C1orf101	DEG
CHAC2	DEG
NNMT	DEG
MLKL	DEG
VWA2	DEG
FBLN7	DEG
ADCY8	DEG
ATP10B	DEG
RAI1	DEG
TRIM54	DEG
PPFIA4	DEG
GCHFR	DEG
KCNH4	DEG
HAVCR1	DEG
GRHL2	DEG
SPHK1	DEG
CLDN7	DEG
PRSS21	DEG
NKX1-2	DEG
SHC2	DEG
CACNB3	DEG
CXXC4	DEG
ZMYND10	DEG
PIM2	DEG
SPARCL1	DEG
DRP2	DEG
GRIN1	DEG
OVOL2	DEG
TMEM31	DEG
PPAP2C	DEG
CLUL1	DEG
ORM2	DEG
RASAL3	DEG
HSPA12B	DEG
S100A6	DEG
GPR176	DEG
PCK2	DEG
TMEM200B	DEG
GREB1L	DEG
MSRB3	DEG
CSMD1	DEG
RAMP3	DEG
ITGB1BP3	DEG
MBOAT1	DEG
ASPDH	DEG
MBNL2	DEG
RPRML	DEG
FAM198B	DEG
FEZF1	DEG
ACE	DEG
SPIB	DEG
TSHR	DEG
PCDH7	DEG
SPON1	DEG
IFI16	DEG
SYK	DEG
CCDC141	DEG
C1orf172	DEG
DENND2D	DEG
CYGB	DEG
SH2D3A	DEG
BCORL1	DEG
NAV3	DEG
PKP1	DEG
B3GNT7	DEG
SSPO	DEG
PTPN7	DEG
GPR35	DEG
TRIM47	DEG
CAPS	DEG
SEMA6D	DEG
LAMC2	DEG
TNFRSF8	DEG
ZNF704	DEG
MECOM	DEG
DPPA5	DEG
FCER2	DEG
LEF1	DEG
SNCG	DEG
PHC1	DEG
TLE2	DEG
IL34	DEG
INHBB	DEG
PROX2	DEG
MAPK15	DEG
MYO3B	DEG
VRTN	DEG
QPCT	DEG
ACSL1	DEG
SESN3	DEG
SPR	DEG
BMPER	DEG
ACOT4	DEG
KRT7	DEG
CACNA2D4	DEG
EYA2	DEG
DIO3	DEG
DAZL	DEG
IP6K3	DEG
RNF148	DEG
PPP1R32	DEG
SYP	DEG
CYP21A2	DEG
DYX1C1	DEG
HTR7	DEG
CMKLR1	DEG
LY75	DEG
TRPC5	DEG
DDX43	DEG
LYST	DEG
GDA	DEG
GDPD3	DEG
HRH2	DEG
TAL2	DEG
DLL1	DEG
OR2W3	DEG
EDARADD	DEG
GIPC2	DEG
MAPK10	DEG
HTR3A	DEG
IRX1	DEG
UBL4B	DEG
CDH9	DEG
ALOX15B	DEG
CHRM1	DEG
CCDC154	DEG
C2orf84	DEG
ATOH8	DEG
RTP1	DEG
TNFRSF10A	DEG
CSTA	DEG
NR2F2	DEG
NFIB	DEG
GOLGA6C	DEG
PGBD5	DEG
COL15A1	DEG
COL9A2	DEG
SLC44A3	DEG
HHLA2	DEG
C1orf116	DEG
RASGRF2	DEG
GAD2	DEG
P2RX5	DEG
PLAGL1	DEG
KIAA1755	DEG
TMEM88	DEG
L1TD1	DEG
EYA4	DEG
TMEM26	DEG
SYPL2	DEG
SOX5	DEG
C1QTNF3	DEG
HLA-G	DEG
BCAN	DEG
GRIA1	DEG
UBQLNL	DEG
TBC1D3F	DEG
C6orf99	DEG
TLX2	DEG
NME5	DEG
CNTN4	DEG
COL3A1	DEG
TGFA	DEG
C3orf80	DEG
EEF1A2	DEG
PRSS23	DEG
FAM24B	DEG
GPR56	DEG
C9orf139	DEG
RELN	DEG
CNTFR	DEG
DUSP2	DEG
CLDN2	DEG
SOX1	DEG
PPM1J	DEG
PITX3	DEG
DBC1	DEG
TSGA10IP	DEG
AHRR	DEG
HES5	DEG
FOXP2	DEG
KCNK15	DEG
LMCD1	DEG
BTC	DEG
PRPH2	DEG
SV2C	DEG
A2ML1	DEG
FZD1	DEG
PRKG2	DEG
TMEM198	DEG
PTX3	DEG
CDCP1	DEG
SLN	DEG
EPHB3	DEG
CXCL12	DEG
LGR5	DEG
CNTNAP1	DEG
HPN	DEG
ESRRB	DEG
FAM19A4	DEG
RIMS4	DEG
ABI3	DEG
KLHDC7A	DEG
VASH2	DEG
GABRP	DEG
PRDM12	DEG
HS3ST2	DEG
MMP25	DEG
FPGT-TNNI3K	DEG
RTL1	DEG
ABCC2	DEG
FAM189A2	DEG
ADAMTS9	DEG
PSMB9	DEG
AQP5	DEG
ANKRD1	DEG
DNMT3B	DEG
LIX1L	DEG
PARP15	DEG
VGLL2	DEG
FGF19	DEG
NECAB2	DEG
EIF4E1B	DEG
EPN3	DEG
GPR20	DEG
RHOB	DEG
CCDC146	DEG
PRDM6	DEG
CABLES1	DEG
SLC35D3	DEG
HAS3	DEG
PTH1R	DEG
FLNC	DEG
GPR160	DEG
CCDC60	DEG
C2orf40	DEG
ECSCR	DEG
CELF6	DEG
CDX1	DEG
ACP5	DEG
HEATR8	DEG
TBC1D3C	DEG
HGFAC	DEG
STYK1	DEG
NRXN3	DEG
KCTD19	DEG
BEST2	DEG
STMN3	DEG
FERMT1	DEG
VSIG10	DEG
BTG2	DEG
MYH15	DEG
SEPHS1	DEG
FLRT2	DEG
DAPK2	DEG
S100A14	DEG
MSX1	DEG
TBC1D28	DEG
C2CD4D	DEG
PAH	DEG
WDR78	DEG
VCAM1	DEG
CRB3	DEG
FOXL2	DEG
CDX4	DEG
KANK4	DEG
PMAIP1	DEG
PRSS56	DEG
TMEM30B	DEG
CYP26C1	DEG
WNT7B	DEG
DLX3	DEG
STK32A	DEG
MAPK13	DEG
KDR	DEG
IGFBP6	DEG
ARL4C	DEG
LCP1	DEG
PNPLA7	DEG
HMX2	DEG
VSTM2L	DEG
ADRA1B	DEG
CLEC18C	DEG
EDNRB	DEG
RTN4RL1	DEG
CLIP4	DEG
MS4A15	DEG
SLC7A5	DEG
TMCO4	DEG
HEG1	DEG
SPINT1	DEG
SLC6A1	DEG
PCDH8	DEG
KIAA1984	DEG
DKK1	DEG
NBL1	DEG
PNMT	DEG
TMPRSS5	DEG
NRGN	DEG
SPINK5	DEG
CCDC80	DEG
NGB	DEG
SLC30A3	DEG
FAM179A	DEG
POU4F1	DEG
CLGN	DEG
RNF144B	DEG
LOC728392	DEG
GJA4	DEG
CRIP1	DEG
WNT4	DEG
HS6ST2	DEG
SP140	DEG
MYO16	DEG
LYPD3	DEG
TMEM155	DEG
GRP	DEG
LRP11	DEG
TMSB4Y	DEG
RBM20	DEG
IGF2	DEG
USHBP1	DEG
CLDN6	DEG
SPRY4	DEG
ASTL	DEG
USP18	DEG
RIN2	DEG
TCEAL5	DEG
OR13A1	DEG
TRPV3	DEG
BAHCC1	DEG
NRG2	DEG
SLC12A1	DEG
MN1	DEG
ASIC1	DEG
INSC	DEG
FZD10	DEG
EFNA5	DEG
GPR162	DEG
LHX5	DEG
SERPINA11	DEG
KCNK10	DEG
NLRP7	DEG
TPBG	DEG
TEC	DEG
PCDH15	DEG
STARD9	DEG
VWF	DEG
FGF17	DEG
DCLK2	DEG
C2CD4B	DEG
BACE2	DEG
ZNF467	DEG
TTC39A	DEG
ACR	DEG
DGKG	DEG
NRCAM	DEG
FIGF	DEG
KCNA4	DEG
MFSD2A	DEG
CRYM	DEG
CRB1	DEG
SLC9A3	DEG
TNFRSF12A	DEG
DLK1	DEG
ADM	DEG
MANEAL	DEG
AP1M2	DEG
TXNIP	DEG
NTF3	DEG
SLC22A20	DEG
CTAGE4	DEG
EMP1	DEG
TICAM2	DEG
KCNH1	DEG
DENND1C	DEG
EFNA2	DEG
MAL2	DEG
ARHGEF5	DEG
CEBPB	DEG
AIF1	DEG
CD37	DEG
TGFB1I1	DEG
GOLGA8A	DEG
ARPM1	DEG
RFX4	DEG
FBLN5	DEG
PLA2G3	DEG
MAK	DEG
SAPCD1	DEG
GNGT2	DEG
SOX21	DEG
PAX7	DEG
MCOLN3	DEG
DDN	DEG
ESRP1	DEG
AIFM3	DEG
LRAT	DEG
SNAI2	DEG
MAP2	DEG
APLNR	DEG
SAMD11	DEG
PAMR1	DEG
SEMA3B	DEG
ID4	DEG
IRX4	DEG
NDNF	DEG
COL5A3	DEG
LIX1	DEG
DMD	DEG
C3orf64	DEG
FAM13C	DEG
CYP46A1	DEG
SCNN1A	DEG
RBM24	DEG
FAIM2	DEG
MX1	DEG
PKIB	DEG
HMGCLL1	DEG
CHI3L1	DEG
FOXI2	DEG
AMBP	DEG
PLCH2	DEG
CLEC18B	DEG
PLA2G16	DEG
ANO1	DEG
STON1	DEG
FAM129A	DEG
MOCOS	DEG
AGPAT2	DEG
TFPI2	DEG
CYP4X1	DEG
RUNX1T1	DEG
CDH11	DEG
SNX32	DEG
SPATS2L	DEG
EXOC3L1	DEG
GABRR1	DEG
SLC43A1	DEG
SERINC4	DEG
CBFA2T3	DEG
RDH16	DEG
KLK5	DEG
FILIP1	DEG
FAM110C	DEG
NLGN4X	DEG
GNA14	DEG
TTLL3	DEG
ADCYAP1	DEG
DIRAS2	DEG
TAP1	DEG
DPEP3	DEG
ASXL3	DEG
TUBA4A	DEG
TBC1D9	DEG
SSTR1	DEG
MT1X	DEG
SNTB1	DEG
CXCL1	DEG
CHST4	DEG
CUBN	DEG
RBP7	DEG
CALB1	DEG
ELOVL2	DEG
ZNF280A	DEG
CAPN8	DEG
PLA2G4B	DEG
SCN9A	DEG
MIA	DEG
CLEC19A	DEG
CCDC102B	DEG
PMEPA1	DEG
SH3GL2	DEG
GNAZ	DEG
EFNB2	DEG
TFPI	DEG
MAT1A	DEG
PTPRH	DEG
WNT1	DEG
FLRT3	DEG
FHOD3	DEG
FOXE3	DEG
ADCY6	DEG
RASEF	DEG
ITM2A	DEG
HAS1	DEG
SEC31B	DEG
ZFHX4	DEG
SCNN1D	DEG
AHSP	DEG
FGD5	DEG
TM4SF18	DEG
ADAMTS8	DEG
MYO1F	DEG
OTOF	DEG
GRM4	DEG
FAM69C	DEG
TMEM169	DEG
PRTG	DEG
CDH3	DEG
TMEM37	DEG
TDRD5	DEG
GLIS3	DEG
TMPRSS9	DEG
SGK2	DEG
LPHN3	DEG
ZBTB16	DEG
KLHDC8A	DEG
PYCARD	DEG
ITPR2	DEG
CXorf69	DEG
GPR114	DEG
CEBPD	DEG
ZFPM2	DEG
GH2	DEG
RBFOX1	DEG
PPM1N	DEG
TMPRSS11E	DEG
PALLD	DEG
CNTN3	DEG
PNPLA5	DEG
WDR96	DEG
CHAC1	DEG
P2RX1	DEG
PROX1	DEG
PKNOX2	DEG
CATSPERG	DEG
C13orf33	DEG
GDAP1L1	DEG
PSD2	DEG
CRYBB1	DEG
C3orf45	DEG
PCDH20	DEG
SULT2B1	DEG
KIAA1239	DEG
VAV1	DEG
PRDM14	DEG
TRH	DEG
GDF10	DEG
VWA3A	DEG
RASAL1	DEG
ZNF521	DEG
THEGL	DEG
HNF4G	DEG
SLC52A3	DEG
PIPOX	DEG
VPS37D	DEG
ADC	DEG
VSX2	DEG
DGKK	DEG
HS3ST5	DEG
ACOXL	DEG
EXD3	DEG
FAM83F	DEG
SCUBE2	DEG
C4B	DEG
AK4	DEG
VAMP8	DEG
AGPAT9	DEG
CXCR4	DEG
ACTA2	DEG
DOCK2	DEG
KLRG2	DEG
HHIPL2	DEG
ADH1A	DEG
AMICA1	DEG
IFITM1	DEG
GCK	DEG
CCDC81	DEG
NLRC5	DEG
MAP6	DEG
CTCFL	DEG
CELF3	DEG
PDGFA	DEG
MAMDC4	DEG
KCTD14	DEG
TYMP	DEG
HSPB8	DEG
AVPR2	DEG
C6orf132	DEG
CTNNA2	DEG
C5	DEG
EPCAM	DEG
POLR3G	DEG
CMTM5	DEG
BMP2	DEG
CLDN4	DEG
TSHZ2	DEG
NR5A2	DEG
FAM46B	DEG
CASKIN1	DEG
FBN2	DEG
PNMA5	DEG
XKR7	DEG
PHF15	DEG
LRRN3	DEG
LMO1	DEG
C8orf4	DEG
SLC4A4	DEG
DLX5	DEG
FOXA1	DEG
BMP5	DEG
KCTD8	DEG
NXPH1	DEG
CARD11	DEG
FNDC5	DEG
RNF165	DEG
NTN5	DEG
FAM84A	DEG
ASIC3	DEG
KLK10	DEG
C6orf165	DEG
TCHH	DEG
LECT1	DEG
NDRG2	DEG
SULF1	DEG
PTCHD4	DEG
ATP2A3	DEG
RAB25	DEG
PDZD4	DEG
CBR3	DEG
ISL2	DEG
GDF3	DEG
LHX6	DEG
WNT3A	DEG
UCN2	DEG
SLC25A27	DEG
C9orf135	DEG
GNB3	DEG
PCDHGB4	DEG
GALNT3	DEG
ICA1	DEG
SIGLEC6	DEG
ARHGAP20	DEG
DNAH6	DEG
KCNS1	DEG
ARHGEF17	DEG
C19orf77	DEG
EDN1	DEG
COL10A1	DEG
COL11A2	DEG
GSC	DEG
C19orf66	DEG
RPRM	DEG
OLFM3	DEG
HDC	DEG
KAT2B	DEG
SORCS1	DEG
MICALL2	DEG
CBLC	DEG
RAX	DEG
ZDHHC22	DEG
KLK8	DEG
ANGPT4	DEG
AKAP6	DEG
CCDC69	DEG
GRM3	DEG
FAM160A1	DEG
UNC5C	DEG
TMTC2	DEG
APCDD1L	DEG
EBF1	DEG
YPEL2	DEG
MYOZ3	DEG
CD70	DEG
CCDC48	DEG
EN1	DEG
SP8	DEG
FIGNL2	DEG
NPR3	DEG
ADRB3	DEG
SLITRK6	DEG
GRM7	DEG
ZIC4	DEG
METRN	DEG
GLI1	DEG
INHBE	DEG
VAX1	DEG
CPXM2	DEG
CASP10	DEG
HPSE2	DEG
PIWIL4	DEG
RUNX3	DEG
RAB17	DEG
MTSS1	DEG
FAM166B	DEG
MBP	DEG
RSPO2	DEG
RELL2	DEG
PTCHD1	DEG
RARB	DEG
NRP1	DEG
LYSMD2	DEG
SLC16A10	DEG
CLEC4G	DEG
SLC7A7	DEG
NKAIN2	DEG
KIAA1244	DEG
LRRC4C	DEG
ALDH1A2	DEG
SMPDL3B	DEG
GAB3	DEG
KCNA1	DEG
LAD1	DEG
SPDEF	DEG
DMBX1	DEG
LSAMP	DEG
PLCE1	DEG
CCDC160	DEG
TSPAN32	DEG
CHGA	DEG
NR5A1	DEG
RHCE	DEG
CLVS1	DEG
TAC1	DEG
PLXNA3	DEG
DMRT2	DEG
OLIG2	DEG
HMOX1	DEG
RAB43	DEG
RGS9BP	DEG
DRD4	DEG
TERF1	DEG
COL7A1	DEG
NHLRC4	DEG
DCST2	DEG
ROBO3	DEG
C9orf173	DEG
LAMC3	DEG
GUCY1B3	DEG
VEPH1	DEG
KDM6B	DEG
TCEA3	DEG
NR2E1	DEG
SLC30A2	DEG
THY1	DEG
GPR115	DEG
CRLF1	DEG
UTF1	DEG
FOXO1	DEG
COBL	DEG
C11orf86	DEG
SLC5A2	DEG
IRX3	DEG
PRDM16	DEG
NPM2	DEG
ITLN2	DEG
LCN10	DEG
ACSBG1	DEG
CHL1	DEG
PRSS33	DEG
GRID2	DEG
LRRIQ1	DEG
FLT1	DEG
CAMK2A	DEG
HCLS1	DEG
ABCA4	DEG
IFI30	DEG
SOWAHD	DEG
CCNI2	DEG
GLRB	DEG
FOLR1	DEG
C6orf223	DEG
DACH1	DEG
NDST4	DEG
RSPO1	DEG
UNC13A	DEG
ME3	DEG
GOLGA6L6	DEG
CD9	DEG
NLRP2	DEG
PAK6	DEG
LCK	DEG
BCL11A	DEG
GAB4	DEG
LRFN2	DEG
MEIS1	DEG
LRRC66	DEG
MEIS2	DEG
ZSCAN10	DEG
CST1	DEG
ASNS	DEG
ZDHHC19	DEG
TNFRSF19	DEG
PRRT2	DEG
CDON	DEG
PLXNA2	DEG
C20orf151	DEG
DNAH1	DEG
CAPG	DEG
F2RL1	DEG
FABP6	DEG
CFB	DEG
RNF152	DEG
TOX3	DEG
RGS11	DEG
CAPS2	DEG
PARP12	DEG
SHISA3	DEG
IKZF3	DEG
ZNF516	DEG
PCDHGB6	DEG
NOG	DEG
LGALS12	DEG
ARPC4-TTLL3	DEG
ARHGEF35	DEG
POU3F2	DEG
BATF3	DEG
APOBEC3B	DEG
ZFP2	DEG
SCN4B	DEG
COMT	DEG
GLYATL2	DEG
TLL1	DEG
FAM116B	DEG
SLC7A9	DEG
ODZ4	DEG
LGALS14	DEG
CDH6	DEG
MMP9	DEG
TCL1B	DEG
CHRD	DEG
TMPRSS2	DEG
ARHGAP15	DEG
C17orf96	DEG
LOC100128071	DEG
TF	DEG
CLEC18A	DEG
LEFTY1	DEG
SRCIN1	DEG
SMARCA2	DEG
MPPED1	DEG
VIM	DEG
C1orf94	DEG
LHX2	DEG
SORCS2	DEG
CAPN13	DEG
GTSF1	DEG
BCO2	DEG
KBTBD10	DEG
PDE1C	DEG
NODAL	DEG
NIPAL4	DEG
CSRNP3	DEG
FBXO2	DEG
USP43	DEG
ZCCHC12	DEG
GDF5	DEG
TNFRSF18	DEG
KCNQ5	DEG
CD19	DEG
TRIM22	DEG
LRP2	DEG
CYP2S1	DEG
BARHL1	DEG
WLS	DEG
PPIC	DEG
KIAA0895	DEG
AHSA2	DEG
CALR3	DEG
ST14	DEG
ZEB1	DEG
RGL3	DEG
TFCP2L1	DEG
OTX2	DEG
IRS4	DEG
SNCB	DEG
C2orf62	DEG
KLKB1	DEG
DES	DEG
CRB2	DEG
UBA7	DEG
KCNJ13	DEG
POMC	DEG
GPR50	DEG
TRNP1	DEG
CKMT1B	DEG
YJEFN3	DEG
ZEB2	DEG
ARX	DEG
MPP1	DEG
PRKCE	DEG
LGI4	DEG
TLE4	DEG
LRRC7	DEG
WNT10B	DEG
GPA33	DEG
PAX2	DEG
VSTM2B	DEG
IGFBP5	DEG
GPR64	DEG
SLC6A16	DEG
PCDH17	DEG
AADACL3	DEG
MAF	DEG
CCDC135	DEG
GLB1L3	DEG
PSORS1C2	DEG
MAFB	DEG
PDE10A	DEG
NOTUM	DEG
CPNE9	DEG
OGDHL	DEG
SYNDIG1L	DEG
FAM169A	DEG
RALYL	DEG
TYRP1	DEG
SCUBE3	DEG
ACAP1	DEG
COLEC12	DEG
TMEM151B	DEG
NAALAD2	DEG
NRP2	DEG
CYB5A	DEG
FRMD3	DEG
APBA1	DEG
AOAH	DEG
PLCXD3	DEG
RSPO3	DEG
PAPPA	DEG
CTSF	DEG
GIMAP4	DEG
C16orf82	DEG
NTRK2	DEG
CTHRC1	DEG
HAPLN1	DEG
IQCA1	DEG
HSD11B2	DEG
SP5	DEG
NCALD	DEG
C11orf35	DEG
TC2N	DEG
SOX10	DEG
PRDM13	DEG
SLC13A5	DEG
RXRG	DEG
FBN1	DEG
AHNAK	DEG
PBX4	DEG
GRIN3B	DEG
TACSTD2	DEG
RFX3	DEG
NTS	DEG
DMRT3	DEG
SYT5	DEG
C15orf55	DEG
TEKT2	DEG
LCN2	DEG
MLPH	DEG
CACNA2D3	DEG
RBM47	DEG
SAMD5	DEG
CCNG2	DEG
SLC22A2	DEG
COL8A2	DEG
FEZF2	DEG
SYT4	DEG
H2BFM	DEG
NBPF16	DEG
DPP4	DEG
EPHA8	DEG
PDCD1	DEG
ITPKA	DEG
GAL	DEG
RFTN2	DEG
GPR111	DEG
UTS2R	DEG
MAFA	DEG
FKBP6	DEG
KCNC1	DEG
ZNF862	DEG
EBI3	DEG
CDH12	DEG
PLEKHF1	DEG
ADHFE1	DEG
RLBP1	DEG
SMOC2	DEG
AMH	DEG
RAB19	DEG
SEMA3C	DEG
TBC1D3	DEG
PLEKHG1	DEG
ARSJ	DEG
CCDC164	DEG
PDE1B	DEG
MT1F	DEG
RBPMS2	DEG
CAMK2B	DEG
TMEM125	DEG
PRR15	DEG
LRRC4B	DEG
GALNT5	DEG
CNIH3	DEG
ZNF503	DEG
GRK5	DEG
RFPL2	DEG
BARHL2	DEG
PRSS46	DEG
SLIT1	DEG
MARVELD3	DEG
KRTAP5-1	DEG
VTN	DEG
GUCY2C	DEG
NXF2B	DEG
TRDN	DEG
FBP1	DEG
PLA2G4C	DEG
TMEM132C	DEG
SOX9	DEG
GPR173	DEG
EPHX3	DEG
PODXL	DEG
RUNDC3A	DEG
ZIC1	DEG
FGF9	DEG
OVGP1	DEG
TMEM82	DEG
PDE8B	DEG
ILDR2	DEG
LMO7	DEG
BEAN1	DEG
ACSS1	DEG
KCNK1	DEG
CDH10	DEG
TRIML2	DEG
PARP14	DEG
AVPR1A	DEG
WFDC2	DEG
ST8SIA2	DEG
NRG1	DEG
THBS3	DEG
ALX4	DEG
ATP1A3	DEG
SCN3A	DEG
ESRP2	DEG
CCDC92	DEG
PRICKLE4	DEG
CRYGD	DEG
ARHGAP9	DEG
SEPT12	DEG
EPHA4	DEG
SMAD6	DEG
KIAA0040	DEG
PCDH9	DEG
DNAJA4	DEG
SIX3	DEG
SHANK1	DEG
CCDC33	DEG
DCLK1	DEG
THBS2	DEG
CDKN2C	DEG
GABRG3	DEG
IER5L	DEG
NRN1	DEG
VWC2	DEG
RIMBP2	DEG
OTX1	DEG
APLP1	DEG
EDNRA	DEG
OR2A7	DEG
C10orf140	DEG
SCG3	DEG
EPB41L4B	DEG
OSTalpha	DEG
IRX5	DEG
C3	DEG
DNAH10	DEG
NCAM1	DEG
ARC	DEG
C2orf78	DEG
GDF7	DEG
G0S2	DEG
CAMK1G	DEG
TFAP2A	DEG
DMRTA2	DEG
SGK110	DEG
SOCS2	DEG
BCL6	DEG
FOXG1	DEG
AMDHD1	DEG
PCDH1	DEG
MEOX1	DEG
TBC1D26	DEG
PLA2G2A	DEG
DIRAS3	DEG
DOCK3	DEG
CR2	DEG
C3orf15	DEG
TSSK3	DEG
DLC1	DEG
GABRD	DEG
NTNG1	DEG
ARMC3	DEG
MKL2	Not DEG
CD109	Not DEG
ABTB1	Not DEG
MAST2	Not DEG
KAT5	Not DEG
WWC2	Not DEG
CD163	Not DEG
UBE2Z	Not DEG
RGPD4	Not DEG
PHYHIPL	Not DEG
ELF2	Not DEG
RAB14	Not DEG
IZUMO1	Not DEG
PRDX2	Not DEG
APOA2	Not DEG
AQP4	Not DEG
PSMC6	Not DEG
SLC2A8	Not DEG
MKNK1	Not DEG
C12orf4	Not DEG
CPLX1	Not DEG
SUV39H1	Not DEG
USF1	Not DEG
R3HDM2	Not DEG
USP29	Not DEG
TMPPE	Not DEG
HIST1H2BC	Not DEG
TTLL2	Not DEG
GBP5	Not DEG
ALG5	Not DEG
DBNDD1	Not DEG
RBP1	Not DEG
ITGA5	Not DEG
SNX5	Not DEG
ANKRD16	Not DEG
GTSE1	Not DEG
KCNIP2	Not DEG
STX2	Not DEG
NKX2-5	Not DEG
TRIM23	Not DEG
RSPH9	Not DEG
CAMK2N1	Not DEG
HIST1H4F	Not DEG
CLCC1	Not DEG
CNFN	Not DEG
ZMYND8	Not DEG
MAP1A	Not DEG
CPXM1	Not DEG
XPA	Not DEG
RAB3IP	Not DEG
NDUFAF2	Not DEG
SRCAP	Not DEG
TAT	Not DEG
OTOP1	Not DEG
TNNT2	Not DEG
H2AFJ	Not DEG
RRAS2	Not DEG
GSDMD	Not DEG
TMEM55A	Not DEG
DUSP12	Not DEG
EFHB	Not DEG
DCTPP1	Not DEG
FBXL17	Not DEG
ETV1	Not DEG
NDUFV2	Not DEG
TRPC1	Not DEG
CLSPN	Not DEG
PSMD14	Not DEG
DDI2	Not DEG
IAH1	Not DEG
WNT5A	Not DEG
GPR84	Not DEG
SEZ6L	Not DEG
ARFIP2	Not DEG
DTX3L	Not DEG
PIP5K1A	Not DEG
LITAF	Not DEG
MMEL1	Not DEG
FBXO41	Not DEG
HTR1D	Not DEG
ASB10	Not DEG
HBP1	Not DEG
VAMP2	Not DEG
ZNF687	Not DEG
MEX3C	Not DEG
PCDH11X	Not DEG
SOCS6	Not DEG
OSGEPL1	Not DEG
ITGB4	Not DEG
HERC3	Not DEG
CROT	Not DEG
ANKRD36B	Not DEG
ARHGAP31	Not DEG
CCDC121	Not DEG
HSPA9	Not DEG
CASP3	Not DEG
XYLT2	Not DEG
WWTR1	Not DEG
GGT5	Not DEG
ERCC3	Not DEG
TLL2	Not DEG
RAVER2	Not DEG
PGAP2	Not DEG
TXNDC11	Not DEG
SUOX	Not DEG
DNM2	Not DEG
GNB2	Not DEG
KLK6	Not DEG
CENPJ	Not DEG
CLSTN2	Not DEG
MTRNR2L6	Not DEG
TRIM44	Not DEG
NCOA3	Not DEG
NAGK	Not DEG
CCDC105	Not DEG
SLC12A5	Not DEG
CD200R1	Not DEG
MED6	Not DEG
ORC6	Not DEG
FAM131B	Not DEG
PRELP	Not DEG
TRAPPC12	Not DEG
SLC25A38	Not DEG
WHSC1L1	Not DEG
PLAGL2	Not DEG
MYD88	Not DEG
HLX	Not DEG
HSH2D	Not DEG
SLC38A4	Not DEG
ZNF281	Not DEG
DCP2	Not DEG
LSM11	Not DEG
ERRFI1	Not DEG
PRH2	Not DEG
AGTRAP	Not DEG
C3orf71	Not DEG
PHF13	Not DEG
PITPNC1	Not DEG
KRT10	Not DEG
CXorf26	Not DEG
FABP5	Not DEG
MMP23B	Not DEG
DLX2	Not DEG
FGD1	Not DEG
APBB1	Not DEG
LEAP2	Not DEG
GLO1	Not DEG
RGS14	Not DEG
LAMP2	Not DEG
NCL	Not DEG
RCSD1	Not DEG
TTC28	Not DEG
HNRNPH3	Not DEG
RUSC2	Not DEG
POLR3GL	Not DEG
RAF1	Not DEG
UBXN4	Not DEG
SYS1	Not DEG
FAM108C1	Not DEG
GPC6	Not DEG
RUFY3	Not DEG
WIPF3	Not DEG
ANG	Not DEG
DEGS1	Not DEG
MEN1	Not DEG
COIL	Not DEG
TMEM116	Not DEG
ZNF3	Not DEG
ICAM2	Not DEG
CXCR6	Not DEG
GJD4	Not DEG
FBXW10	Not DEG
SLC36A1	Not DEG
PCDHB9	Not DEG
C14orf129	Not DEG
DSG3	Not DEG
KDELR1	Not DEG
PCDHB6	Not DEG
KPNA2	Not DEG
ZNF705D	Not DEG
AEBP2	Not DEG
RAB32	Not DEG
ITGA2B	Not DEG
CDHR4	Not DEG
ARID5B	Not DEG
RFC2	Not DEG
ZFP1	Not DEG
SLC5A9	Not DEG
IRS2	Not DEG
ATP12A	Not DEG
MUL1	Not DEG
JAM2	Not DEG
KATNB1	Not DEG
AUH	Not DEG
ZNF226	Not DEG
AP4M1	Not DEG
TMEM130	Not DEG
ATP6V1B2	Not DEG
AGBL3	Not DEG
RCOR3	Not DEG
ZBTB25	Not DEG
RPL27	Not DEG
PLEKHJ1	Not DEG
ADH5	Not DEG
CCT5	Not DEG
SPRYD7	Not DEG
TSTD1	Not DEG
SH3GL1	Not DEG
MRPS24	Not DEG
TLR3	Not DEG
SLCO1A2	Not DEG
UGT2B7	Not DEG
CD300LG	Not DEG
VASP	Not DEG
GPSM3	Not DEG
EFNA4	Not DEG
KCNA6	Not DEG
CHMP4A	Not DEG
NEK3	Not DEG
RNF41	Not DEG
MTHFD2	Not DEG
COX6C	Not DEG
FAM82A1	Not DEG
G6PD	Not DEG
UBE3B	Not DEG
PPARA	Not DEG
PRKCQ	Not DEG
CKS2	Not DEG
ARHGAP44	Not DEG
ACTR8	Not DEG
GRAMD2	Not DEG
SEPSECS	Not DEG
ANXA4	Not DEG
MRPS15	Not DEG
ITGA10	Not DEG
JKAMP	Not DEG
PRR5	Not DEG
ASNA1	Not DEG
FBXO28	Not DEG
LRRTM2	Not DEG
AARS	Not DEG
PKHD1	Not DEG
ART5	Not DEG
LOC646851	Not DEG
DPY19L3	Not DEG
LDLRAD3	Not DEG
ABHD10	Not DEG
STAMBP	Not DEG
ALKBH8	Not DEG
RNF166	Not DEG
ZNF835	Not DEG
EPX	Not DEG
GOLT1B	Not DEG
PPFIA3	Not DEG
GRIK3	Not DEG
JAK1	Not DEG
DGCR14	Not DEG
PPIF	Not DEG
DHRS7B	Not DEG
TPTE	Not DEG
RNF187	Not DEG
MON1B	Not DEG
CYTIP	Not DEG
COQ6	Not DEG
GULP1	Not DEG
C4orf46	Not DEG
PDE4B	Not DEG
GDI2	Not DEG
LAMA5	Not DEG
NFAT5	Not DEG
RNMT	Not DEG
SLC39A8	Not DEG
ODZ2	Not DEG
2020-03-11	Not DEG
MSL3	Not DEG
TUBB2B	Not DEG
INSR	Not DEG
ZMYND11	Not DEG
HNRNPA0	Not DEG
C19orf70	Not DEG
PCNP	Not DEG
ANKRD23	Not DEG
CLCN2	Not DEG
C1orf192	Not DEG
ACSM2A	Not DEG
SEMA4D	Not DEG
WDFY3	Not DEG
CBX5	Not DEG
RAPGEF4	Not DEG
SLC25A37	Not DEG
NXT2	Not DEG
PTGER3	Not DEG
GMDS	Not DEG
TMEM51	Not DEG
HGSNAT	Not DEG
ASCC1	Not DEG
INPP5A	Not DEG
ANTXR2	Not DEG
SLC2A14	Not DEG
FAM48B2	Not DEG
PTH2R	Not DEG
RPS6KA2	Not DEG
NEK8	Not DEG
KLK7	Not DEG
C8orf76	Not DEG
NDUFA7	Not DEG
SCAND1	Not DEG
MAP3K4	Not DEG
MAPRE1	Not DEG
TBC1D16	Not DEG
MAP9	Not DEG
SLC25A3	Not DEG
CWF19L2	Not DEG
TMEM9	Not DEG
FLRT1	Not DEG
GYLTL1B	Not DEG
GPM6B	Not DEG
GJC3	Not DEG
SKP1	Not DEG
CNBP	Not DEG
TROAP	Not DEG
SLC23A2	Not DEG
RPL31	Not DEG
CCNH	Not DEG
ACBD3	Not DEG
CTAGE15P	Not DEG
CDCP2	Not DEG
PRDM10	Not DEG
ZNF707	Not DEG
TMEM41A	Not DEG
TEKT3	Not DEG
TNXB	Not DEG
ARID4A	Not DEG
EIF4B	Not DEG
TARBP1	Not DEG
GABRA2	Not DEG
MMP15	Not DEG
IL12A	Not DEG
ARL10	Not DEG
PAPOLG	Not DEG
PIGF	Not DEG
CCDC86	Not DEG
GTF2IRD2B	Not DEG
GPR110	Not DEG
C5orf24	Not DEG
SNX3	Not DEG
C1orf111	Not DEG
SNX2	Not DEG
KCNE3	Not DEG
ENTPD6	Not DEG
ZNF549	Not DEG
HNRNPK	Not DEG
ST3GAL6	Not DEG
ZNF583	Not DEG
MID2	Not DEG
ODZ1	Not DEG
MSANTD1	Not DEG
CNEP1R1	Not DEG
TNRC6A	Not DEG
ARIH2	Not DEG
FAM213B	Not DEG
ATP1B4	Not DEG
DCAF16	Not DEG
SEPW1	Not DEG
GNAT2	Not DEG
SPATA17	Not DEG
TAPBP	Not DEG
CHMP3	Not DEG
PHF1	Not DEG
VCPIP1	Not DEG
TXNDC2	Not DEG
C19orf76	Not DEG
DERL1	Not DEG
CXCL6	Not DEG
ENAH	Not DEG
ARL5B	Not DEG
PHC3	Not DEG
CECR6	Not DEG
MIER3	Not DEG
TMEM110	Not DEG
PROM1	Not DEG
SLC29A2	Not DEG
TNFRSF21	Not DEG
PPP1CB	Not DEG
SPATA6	Not DEG
USP19	Not DEG
PNPO	Not DEG
C16orf59	Not DEG
ZNF718	Not DEG
VN1R1	Not DEG
KBTBD8	Not DEG
SUPT4H1	Not DEG
PALM3	Not DEG
FAM171B	Not DEG
WDR27	Not DEG
JAK2	Not DEG
SYDE2	Not DEG
SMEK1	Not DEG
C2orf63	Not DEG
HNRNPA1L2	Not DEG
NR4A2	Not DEG
EIF1AY	Not DEG
GJB7	Not DEG
GSPT2	Not DEG
CCDC51	Not DEG
C16orf57	Not DEG
STC2	Not DEG
ACTR1B	Not DEG
SLC7A3	Not DEG
PMFBP1	Not DEG
NPR2	Not DEG
SEC24A	Not DEG
PFN2	Not DEG
CACNA1S	Not DEG
CAPZA2	Not DEG
FBLN2	Not DEG
SMARCB1	Not DEG
MEX3D	Not DEG
MAP7D1	Not DEG
TNFRSF10B	Not DEG
KCNT1	Not DEG
SMARCA4	Not DEG
IFNAR2	Not DEG
MTM1	Not DEG
BAX	Not DEG
PLCG1	Not DEG
STARD3	Not DEG
BTBD6	Not DEG
ZNF674	Not DEG
ZNF575	Not DEG
LOC649330	Not DEG
UBLCP1	Not DEG
DPP10	Not DEG
ACTL6A	Not DEG
KRCC1	Not DEG
PELI2	Not DEG
RNF123	Not DEG
RLF	Not DEG
NQO2	Not DEG
C11orf95	Not DEG
KLRD1	Not DEG
PKIG	Not DEG
DZIP1L	Not DEG
ACBD7	Not DEG
METTL11A	Not DEG
HYLS1	Not DEG
PXDC1	Not DEG
TMEM208	Not DEG
BRPF3	Not DEG
IRF2BP2	Not DEG
ESYT2	Not DEG
TBC1D5	Not DEG
GLB1L2	Not DEG
IFI35	Not DEG
H2AFZ	Not DEG
DCAF13	Not DEG
NAPA	Not DEG
SNX10	Not DEG
CCBP2	Not DEG
CHP	Not DEG
LDHAL6A	Not DEG
PLOD2	Not DEG
FAM21A	Not DEG
HNRNPUL1	Not DEG
PRSS16	Not DEG
BCL2L11	Not DEG
BICC1	Not DEG
TBL3	Not DEG
DDX51	Not DEG
RIN1	Not DEG
ZNF841	Not DEG
EDAR	Not DEG
PLXNB3	Not DEG
ASPM	Not DEG
OXA1L	Not DEG
TAF7	Not DEG
SLC13A4	Not DEG
TPM2	Not DEG
C12orf26	Not DEG
CUL1	Not DEG
POLR2J	Not DEG
CXorf40B	Not DEG
CD63	Not DEG
FAM13B	Not DEG
RBM34	Not DEG
POC1B	Not DEG
SLC38A5	Not DEG
KIAA1109	Not DEG
ELP3	Not DEG
COX6B2	Not DEG
TUBD1	Not DEG
ZBED6	Not DEG
NT5DC2	Not DEG
APOL6	Not DEG
PDDC1	Not DEG
ARHGAP22	Not DEG
KLF10	Not DEG
OR2A25	Not DEG
CCHCR1	Not DEG
MORN4	Not DEG
NIN	Not DEG
CCNB3	Not DEG
RPL39L	Not DEG
MIS12	Not DEG
KDM4D	Not DEG
TRAM1L1	Not DEG
MFSD4	Not DEG
SH3BP2	Not DEG
JAKMIP2	Not DEG
MARK4	Not DEG
PLSCR2	Not DEG
SUGP1	Not DEG
FAT3	Not DEG
AGPAT5	Not DEG
DDX18	Not DEG
BNC1	Not DEG
FAM53A	Not DEG
TNFAIP8	Not DEG
TM6SF1	Not DEG
CHD4	Not DEG
SLC22A31	Not DEG
FTH1	Not DEG
PTPRM	Not DEG
SYNPO2	Not DEG
RPL3	Not DEG
DAB1	Not DEG
ATP2C2	Not DEG
EYS	Not DEG
SH3BP1	Not DEG
RBP4	Not DEG
SPTSSA	Not DEG
PNISR	Not DEG
CHIC1	Not DEG
MYBL1	Not DEG
NPFF	Not DEG
RPS23	Not DEG
C10orf57	Not DEG
ZNFX1	Not DEG
CAMSAP3	Not DEG
CREB3L2	Not DEG
ISM2	Not DEG
KLRK1	Not DEG
DMXL1	Not DEG
ITFG1	Not DEG
PDE12	Not DEG
GRM2	Not DEG
ALDH9A1	Not DEG
FAM123A	Not DEG
ROBO2	Not DEG
OBFC1	Not DEG
RPS6	Not DEG
ARL9	Not DEG
UBP1	Not DEG
ZWINT	Not DEG
SERPINI2	Not DEG
POLR1C	Not DEG
ARL15	Not DEG
CEBPE	Not DEG
SSH3	Not DEG
PPP1R10	Not DEG
SERINC2	Not DEG
PCDHA9	Not DEG
TRIM62	Not DEG
PRPF38B	Not DEG
DLX4	Not DEG
CENPL	Not DEG
MYOM1	Not DEG
APOL4	Not DEG
TACC2	Not DEG
ZNF195	Not DEG
ATP8B1	Not DEG
ZNF84	Not DEG
EPHA2	Not DEG
ACPL2	Not DEG
DHX36	Not DEG
TUBB1	Not DEG
ADPGK	Not DEG
C1orf162	Not DEG
EEF1D	Not DEG
PARP3	Not DEG
TSN	Not DEG
TBL1Y	Not DEG
NBPF7	Not DEG
APEX1	Not DEG
FNDC1	Not DEG
TPST1	Not DEG
CIC	Not DEG
PPP4C	Not DEG
NKG7	Not DEG
TEAD1	Not DEG
CTH	Not DEG
RPS6KB2	Not DEG
RBPJ	Not DEG
RUNX1	Not DEG
SMARCC2	Not DEG
ANAPC2	Not DEG
BHMT2	Not DEG
APOPT1	Not DEG
HIST1H4E	Not DEG
C11orf88	Not DEG
RPS11	Not DEG
AVPI1	Not DEG
GDNF	Not DEG
THRAP3	Not DEG
CHRM2	Not DEG
USP3	Not DEG
IKZF2	Not DEG
HDAC10	Not DEG
EXD2	Not DEG
IDH3G	Not DEG
IMPAD1	Not DEG
CALHM2	Not DEG
ARL17A	Not DEG
NHP2	Not DEG
BSG	Not DEG
PTHLH	Not DEG
CYP20A1	Not DEG
DNAJC12	Not DEG
TXLNA	Not DEG
GLUD1	Not DEG
FRA10AC1	Not DEG
OAZ3	Not DEG
C1QTNF9	Not DEG
SCO1	Not DEG
RPS4X	Not DEG
RCE1	Not DEG
COL18A1	Not DEG
SF3B14	Not DEG
UBN1	Not DEG
MCART6	Not DEG
HIST2H3D	Not DEG
KLF1	Not DEG
SERPINB6	Not DEG
SEPT14	Not DEG
DOK5	Not DEG
MIS18BP1	Not DEG
NRXN1	Not DEG
C1orf141	Not DEG
CNTRL	Not DEG
MCM5	Not DEG
OGFOD1	Not DEG
GPR61	Not DEG
MRPL54	Not DEG
UBE2D2	Not DEG
BLNK	Not DEG
C6orf57	Not DEG
LONRF3	Not DEG
IFIT1B	Not DEG
ALG9	Not DEG
ZNF664-FAM101A	Not DEG
PDK3	Not DEG
ZNF93	Not DEG
PLK4	Not DEG
ALDH16A1	Not DEG
NTRK3	Not DEG
AKT1S1	Not DEG
LTA4H	Not DEG
SRY	Not DEG
FLJ22184	Not DEG
RPN2	Not DEG
RPP14	Not DEG
PCDH18	Not DEG
ZNF99	Not DEG
PAK4	Not DEG
SRPK3	Not DEG
AKD1	Not DEG
PER3	Not DEG
NUP133	Not DEG
C21orf56	Not DEG
NUPL2	Not DEG
ACVRL1	Not DEG
NBN	Not DEG
PATZ1	Not DEG
RASL10B	Not DEG
MMP24	Not DEG
ZNF114	Not DEG
GAS2L1	Not DEG
SMAD1	Not DEG
HSD17B11	Not DEG
XPOT	Not DEG
COX4I2	Not DEG
RDH12	Not DEG
PCDHB15	Not DEG
UBE2W	Not DEG
LRRN4	Not DEG
MORC3	Not DEG
DYRK3	Not DEG
GSTZ1	Not DEG
[truncated: 14,466 more rows]
