# Supplementary material for: Modeling expression ranks for noise-tolerant differential expression analysis of scRNA-seq data
Source: HighWire-hosted journal article supplement (doi:10.1101/gr.267070.120), 2021-03-05
Supplement: Supplemental_Table_S7.xlsx [file Supplemental_Table_S7.xlsx]

## Sheet: Chu Bulk Dataset (H9 vs. NPC)
Supplemental Table S7: Bulk based DEG calls for the Chu dataset (replicates H9 vs. NPC).
Gene Symbol	DEG Call
CDH1	DEG
NKX2-5	DEG
OTOP1	DEG
TNC	DEG
IGFN1	DEG
HLX	DEG
IL1RAPL1	DEG
GABRB3	DEG
OVOL1	DEG
SPTSSB	DEG
ARHGAP24	DEG
NFE2L3	DEG
SLC26A10	DEG
ARID5B	DEG
PKP3	DEG
HPCAL4	DEG
KIAA1683	DEG
TMEM229A	DEG
NXF2	DEG
ZDHHC23	DEG
ODZ2	DEG
FAM48B2	DEG
STAMBPL1	DEG
PRAM1	DEG
CTAGE15P	DEG
EBF4	DEG
NANOG	DEG
SDK2	DEG
SRGAP3	DEG
RNF128	DEG
SIT1	DEG
PLVAP	DEG
FAM101A	DEG
STON1-GTF2A1L	DEG
AZU1	DEG
KIAA1407	DEG
HHAT	DEG
SOX6	DEG
HTR1A	DEG
MEF2C	DEG
PNCK	DEG
MSX2	DEG
BSPRY	DEG
MYOM1	DEG
C1orf162	DEG
RORC	DEG
IKZF2	DEG
SMOC1	DEG
RD3	DEG
ADAMTS18	DEG
SFRP4	DEG
PRSS8	DEG
TDGF1	DEG
GRHL3	DEG
LMX1A	DEG
NIPAL2	DEG
ALPK2	DEG
DHX58	DEG
HES4	DEG
SQRDL	DEG
CFI	DEG
COL11A1	DEG
POU3F4	DEG
NRK	DEG
TNFAIP6	DEG
FBXL21	DEG
ANXA1	DEG
NT5E	DEG
ACTL8	DEG
MT1E	DEG
KCNB1	DEG
HESX1	DEG
HMSD	DEG
ADCY2	DEG
EPHA7	DEG
CHST7	DEG
TH	DEG
SOCS1	DEG
BCMO1	DEG
KIF19	DEG
CNTN6	DEG
AMHR2	DEG
GPX2	DEG
RARRES2	DEG
LOC100129924	DEG
IDO1	DEG
PI15	DEG
NGEF	DEG
NR4A3	DEG
PAX6	DEG
EMX2	DEG
GNA15	DEG
APC2	DEG
NNAT	DEG
MT2A	DEG
WNT2B	DEG
ARHGAP36	DEG
KCNF1	DEG
EPHA1	DEG
PGM5	DEG
C6orf118	DEG
CYP3A43	DEG
DPYSL5	DEG
ACRBP	DEG
FAM65A	DEG
NEUROG2	DEG
OLFML1	DEG
ETV4	DEG
LOC120824	DEG
ZNF436	DEG
MUSTN1	DEG
TRIM73	DEG
BCL2L14	DEG
FAM70A	DEG
GREM1	DEG
FANK1	DEG
PMP22	DEG
ODF3B	DEG
DMRTC1	DEG
WNT5B	DEG
ARHGAP8	DEG
NOS2	DEG
NXPH3	DEG
COL2A1	DEG
MYLIP	DEG
CSRP1	DEG
NPFFR2	DEG
ACTL6B	DEG
ROR2	DEG
DUSP27	DEG
B3GALT5	DEG
SCN7A	DEG
RASGRP2	DEG
DARC	DEG
PPAPDC1A	DEG
NEUROD4	DEG
SLC22A13	DEG
BMP4	DEG
CNTN1	DEG
BHLHE22	DEG
FAM167B	DEG
OLIG3	DEG
NEUROD1	DEG
NKX6-1	DEG
FOXL1	DEG
MYL4	DEG
TNFSF11	DEG
PAX3	DEG
TNNT3	DEG
GRPR	DEG
PIGZ	DEG
SCGB3A2	DEG
GLRA4	DEG
CPE	DEG
PYROXD2	DEG
NKX3-2	DEG
FOXH1	DEG
GFRA1	DEG
F2RL2	DEG
RERG	DEG
GLI3	DEG
ENTPD2	DEG
PDE6G	DEG
BNC2	DEG
TTC29	DEG
STAT4	DEG
DUSP5	DEG
CDH8	DEG
GAS1	DEG
CCDC89	DEG
TNFRSF11A	DEG
SLC17A9	DEG
TKTL1	DEG
BOC	DEG
HECW1	DEG
CTNNA3	DEG
PSMB8	DEG
ZNF248	DEG
C22orf43	DEG
ZNF703	DEG
H1F0	DEG
TSPAN18	DEG
C9orf9	DEG
ARID3C	DEG
CDH2	DEG
TSLP	DEG
MDGA1	DEG
MATK	DEG
TPPP3	DEG
POU5F1	DEG
EGR3	DEG
WIF1	DEG
UCMA	DEG
HERC6	DEG
FRZB	DEG
AIM1	DEG
C9orf171	DEG
CXCL5	DEG
PPP1R1B	DEG
TRIB3	DEG
CMPK2	DEG
TRPM8	DEG
MGAM	DEG
PROKR2	DEG
VIL1	DEG
MACROD2	DEG
CDH20	DEG
HSD11B1L	DEG
CRABP2	DEG
UGP2	DEG
ESYT3	DEG
DSCAM	DEG
ENO3	DEG
CD177	DEG
SFRP5	DEG
WNT8B	DEG
CLIP3	DEG
NTN3	DEG
CHAC2	DEG
RRAD	DEG
CACNA1F	DEG
KCNG2	DEG
FBLN7	DEG
FNDC7	DEG
ATP10B	DEG
RAI1	DEG
TRIM54	DEG
GCHFR	DEG
RUSC1-AS1	DEG
KCNH4	DEG
GRHL2	DEG
SPHK1	DEG
CLDN7	DEG
KCNJ4	DEG
BTK	DEG
C14orf38	DEG
NKX1-2	DEG
SHC2	DEG
GNG8	DEG
CACNB3	DEG
CXXC4	DEG
PIM2	DEG
SPARCL1	DEG
MVP	DEG
HHLA3	DEG
OVOL2	DEG
PPAP2C	DEG
KAL1	DEG
ORM2	DEG
RASAL3	DEG
CXCL14	DEG
HSPA12B	DEG
POU3F3	DEG
S100A6	DEG
MAB21L2	DEG
FGF8	DEG
GPR176	DEG
GREB1L	DEG
MSRB3	DEG
ITGB1BP3	DEG
MBOAT1	DEG
ASPDH	DEG
MBNL2	DEG
FAM198B	DEG
FEZF1	DEG
ACE	DEG
LRRC8E	DEG
TSHR	DEG
GPNMB	DEG
SPON1	DEG
IFI16	DEG
TRPC3	DEG
SYK	DEG
CCDC141	DEG
C1orf172	DEG
DENND2D	DEG
SH2D3A	DEG
GAB2	DEG
BCORL1	DEG
B3GNT7	DEG
TAGLN	DEG
SDR42E1	DEG
SSPO	DEG
GPR35	DEG
TRIM47	DEG
CAPS	DEG
FAM26F	DEG
CRYAB	DEG
LAMC2	DEG
TNFRSF8	DEG
VMO1	DEG
DPPA5	DEG
VAX2	DEG
LEF1	DEG
HES7	DEG
SNCG	DEG
PHC1	DEG
TLE2	DEG
IL34	DEG
EGFLAM	DEG
VWA5B1	DEG
B3GALT2	DEG
SLC47A2	DEG
DCC	DEG
MYO3B	DEG
VRTN	DEG
GPER	DEG
SGCG	DEG
ACSL1	DEG
SESN3	DEG
BMPER	DEG
KRT7	DEG
CACNA2D4	DEG
SLC4A9	DEG
EYA2	DEG
DIO3	DEG
CAT	DEG
FILIP1L	DEG
KIAA1045	DEG
CNPY1	DEG
IP6K3	DEG
PPP1R32	DEG
SYP	DEG
DYX1C1	DEG
DMGDH	DEG
TRPC5	DEG
PILRA	DEG
LYST	DEG
GDA	DEG
GDPD3	DEG
HRH2	DEG
LHFPL4	DEG
TAL2	DEG
DLL1	DEG
GIPC2	DEG
MAPK10	DEG
HTR3A	DEG
IRX1	DEG
CDH9	DEG
CHRM1	DEG
CCDC154	DEG
TAP2	DEG
ATOH8	DEG
ERBB4	DEG
RTP1	DEG
LOC339862	DEG
SLC16A12	DEG
NR2F2	DEG
NFIB	DEG
MCCC2	DEG
PGBD5	DEG
COL9A2	DEG
FAM167A	DEG
TAGLN3	DEG
HHLA2	DEG
C1orf116	DEG
RASGRF2	DEG
SLC24A3	DEG
TMEM132D	DEG
OPRK1	DEG
P2RX5	DEG
CYP2E1	DEG
PLAGL1	DEG
IFI27	DEG
TMEM88	DEG
L1TD1	DEG
EYA4	DEG
TMEM26	DEG
SYPL2	DEG
TFAP2C	DEG
SOX5	DEG
HLA-G	DEG
RASA4	DEG
HS3ST6	DEG
GRIA1	DEG
TULP1	DEG
SIM2	DEG
LOC100507055	DEG
SYTL5	DEG
MSTN	DEG
C6orf99	DEG
KLHL4	DEG
TLX2	DEG
CNTN4	DEG
TLR9	DEG
USP9Y	DEG
COL3A1	DEG
KCND2	DEG
TGFA	DEG
ASCL1	DEG
C3orf80	DEG
EEF1A2	DEG
PRSS23	DEG
METTL24	DEG
GPR56	DEG
NPAS4	DEG
RELN	DEG
LRRC24	DEG
CCDC37	DEG
CNTFR	DEG
DUSP2	DEG
CLDN2	DEG
SOX1	DEG
DBC1	DEG
AHRR	DEG
HES5	DEG
C5orf4	DEG
LMCD1	DEG
BTC	DEG
PRPH2	DEG
SV2C	DEG
A2ML1	DEG
NETO1	DEG
ZBTB7C	DEG
ZNF750	DEG
C3orf32	DEG
FZD1	DEG
LBH	DEG
TMEM198	DEG
PTX3	DEG
CDCP1	DEG
KRT12	DEG
EPHB3	DEG
CXCL12	DEG
LGR5	DEG
IRF6	DEG
FAM19A4	DEG
RIMS4	DEG
ABI3	DEG
KLHDC7A	DEG
FMO1	DEG
VASH2	DEG
GABRP	DEG
PRDM12	DEG
MYO15A	DEG
HS3ST2	DEG
MMP25	DEG
FPGT-TNNI3K	DEG
RTL1	DEG
ABCA12	DEG
ABCC2	DEG
FAM189A2	DEG
ADAMTS9	DEG
PSMB9	DEG
AQP5	DEG
F11	DEG
ANKRD1	DEG
DNMT3B	DEG
LIX1L	DEG
PARP15	DEG
FGF19	DEG
EIF4E1B	DEG
GPR20	DEG
RHOB	DEG
CCDC146	DEG
SLC35D3	DEG
HAS3	DEG
GUCY1A3	DEG
PTH1R	DEG
PCDH11Y	DEG
FLNC	DEG
SPAG6	DEG
C7orf61	DEG
GPR160	DEG
CCDC60	DEG
C2orf40	DEG
CELF6	DEG
CDX1	DEG
ZFY	DEG
THNSL2	DEG
HEATR8	DEG
HGFAC	DEG
STYK1	DEG
APOLD1	DEG
KCTD19	DEG
BEST2	DEG
STMN3	DEG
FERMT1	DEG
BTG2	DEG
MYH15	DEG
SEPHS1	DEG
FLRT2	DEG
MSX1	DEG
C2CD4D	DEG
PAH	DEG
ZFHX3	DEG
VCAM1	DEG
CRB3	DEG
IL5RA	DEG
FOXL2	DEG
CDX4	DEG
KANK4	DEG
PMAIP1	DEG
PRSS56	DEG
TMEM30B	DEG
CNGA4	DEG
CYP26C1	DEG
LFNG	DEG
WNT7B	DEG
DLX3	DEG
STK32A	DEG
MAPK13	DEG
GPC4	DEG
IGFBP6	DEG
NTRK1	DEG
ARL4C	DEG
KIRREL3	DEG
LCP1	DEG
HMX2	DEG
VSTM2L	DEG
C15orf27	DEG
RTN4RL1	DEG
MS4A15	DEG
TMCO4	DEG
SPINT1	DEG
PCDH8	DEG
KIAA1984	DEG
DKK1	DEG
NBL1	DEG
PNMT	DEG
SPINK5	DEG
CCDC80	DEG
NGB	DEG
SLC30A3	DEG
POU4F1	DEG
RNF144B	DEG
LOC728392	DEG
CRIP1	DEG
WNT4	DEG
GPR146	DEG
MYO16	DEG
LYPD3	DEG
GRP	DEG
LRP11	DEG
RBM20	DEG
IGF2	DEG
NGFR	DEG
CLDN6	DEG
SPRY4	DEG
USP18	DEG
CASC1	DEG
TCEAL5	DEG
OR13A1	DEG
TRPV3	DEG
BAHCC1	DEG
NRG2	DEG
ANKRD65	DEG
INSC	DEG
FZD10	DEG
EFNA5	DEG
GPR162	DEG
LHX5	DEG
SERPINA11	DEG
KCNK10	DEG
NLRP7	DEG
TPBG	DEG
TEC	DEG
VWF	DEG
DCLK2	DEG
BACE2	DEG
ZNF467	DEG
TTC39A	DEG
SLC5A4	DEG
NRCAM	DEG
KCNA4	DEG
MFSD2A	DEG
CRB1	DEG
SLC9A3	DEG
ESAM	DEG
DLK1	DEG
ADM	DEG
LOC388849	DEG
MANEAL	DEG
AP1M2	DEG
TXNIP	DEG
NTF3	DEG
SLC22A20	DEG
CTAGE4	DEG
EMP1	DEG
SPIN2A	DEG
KCNH1	DEG
PAX8	DEG
DENND1C	DEG
MAL2	DEG
ARHGEF5	DEG
AIF1	DEG
CD37	DEG
RYR1	DEG
TGFB1I1	DEG
ARPM1	DEG
RFX4	DEG
FBLN5	DEG
PLA2G3	DEG
MAK	DEG
SAPCD1	DEG
GNGT2	DEG
TNRC18	DEG
SOX21	DEG
PAX7	DEG
GPR26	DEG
GPRC5A	DEG
ELAVL4	DEG
ACOT6	DEG
FOXC2	DEG
DDN	DEG
CREB5	DEG
ESRP1	DEG
AIFM3	DEG
LOC100289187	DEG
LRAT	DEG
SNAI2	DEG
MAP2	DEG
SAMD11	DEG
TRIM74	DEG
PAMR1	DEG
SEMA3B	DEG
ID4	DEG
IRX4	DEG
NDNF	DEG
LIX1	DEG
DMD	DEG
C3orf64	DEG
FOXA2	DEG
CYP46A1	DEG
SCNN1A	DEG
GPR17	DEG
RBM24	DEG
FAIM2	DEG
ARR3	DEG
WFIKKN1	DEG
MX1	DEG
PKIB	DEG
HMGCLL1	DEG
CHI3L1	DEG
FUT3	DEG
IL13RA1	DEG
AMBP	DEG
PLCH2	DEG
CLEC18B	DEG
NR1I2	DEG
ANO1	DEG
FAM129A	DEG
MOCOS	DEG
AGPAT2	DEG
HOXA1	DEG
TFPI2	DEG
CYP4X1	DEG
RUNX1T1	DEG
CDH11	DEG
SNX32	DEG
HIST1H1A	DEG
CDKN2B	DEG
MSLN	DEG
EXOC3L1	DEG
SLC43A1	DEG
SERINC4	DEG
CBFA2T3	DEG
KLK5	DEG
FILIP1	DEG
NLGN4X	DEG
GNA14	DEG
TLR4	DEG
TTLL3	DEG
DIRAS2	DEG
TAP1	DEG
ASXL3	DEG
TUBA4A	DEG
TBC1D9	DEG
WNT11	DEG
SSTR1	DEG
ALDH1A3	DEG
MT1X	DEG
CXCL1	DEG
CHST4	DEG
MS4A6A	DEG
CUBN	DEG
RBP7	DEG
CYP26B1	DEG
CALB1	DEG
ELOVL2	DEG
CAPN8	DEG
SCN9A	DEG
MIA	DEG
CLEC19A	DEG
CCDC102B	DEG
PMEPA1	DEG
SH3GL2	DEG
LYPD1	DEG
EFNB2	DEG
TFPI	DEG
MAT1A	DEG
PTPRH	DEG
FLRT3	DEG
BTN1A1	DEG
ITM2A	DEG
SEC31B	DEG
ZFHX4	DEG
AHSP	DEG
FGD5	DEG
FLJ27352	DEG
TM4SF18	DEG
EMP3	DEG
ADAMTS8	DEG
PRTN3	DEG
GRM4	DEG
FAM69C	DEG
TMEM169	DEG
HPGD	DEG
PRTG	DEG
CDH3	DEG
TMEM37	DEG
TDRD5	DEG
GLIS3	DEG
TMPRSS9	DEG
LOXHD1	DEG
SGK2	DEG
LPHN3	DEG
ZBTB16	DEG
RBAK-LOC389458	DEG
KLHDC8A	DEG
PYCARD	DEG
ITPR2	DEG
CXorf69	DEG
GPR114	DEG
RBFOX1	DEG
TMPRSS11E	DEG
PALLD	DEG
ABCG1	DEG
PNPLA5	DEG
PALM	DEG
GHRH	DEG
WDR96	DEG
ZAN	DEG
NEBL	DEG
PROX1	DEG
PROS1	DEG
GLT25D2	DEG
PKNOX2	DEG
ELFN1	DEG
CATSPERG	DEG
C13orf33	DEG
GDAP1L1	DEG
PCDH20	DEG
TSPAN19	DEG
KIAA1239	DEG
PRDM14	DEG
LURAP1L	DEG
TRH	DEG
AGBL1	DEG
GDF10	DEG
VWA3A	DEG
RASAL1	DEG
ZNF521	DEG
THEGL	DEG
HNF4G	DEG
SLC52A3	DEG
PIPOX	DEG
VPS37D	DEG
ADC	DEG
GRAMD1C	DEG
VSX2	DEG
S1PR1	DEG
DGKK	DEG
HS3ST5	DEG
ACOXL	DEG
EXD3	DEG
FAM83F	DEG
SCUBE2	DEG
AK4	DEG
RFPL3	DEG
C8orf46	DEG
VAMP8	DEG
AGPAT9	DEG
CXCR4	DEG
SGK1	DEG
ACTA2	DEG
KLRG2	DEG
MYCBPAP	DEG
GCK	DEG
CYP2A13	DEG
AGAP4	DEG
CTCFL	DEG
CELF3	DEG
KCTD14	DEG
HSPB8	DEG
C6orf132	DEG
CTNNA2	DEG
C5	DEG
EPCAM	DEG
POLR3G	DEG
CD82	DEG
CMTM5	DEG
BTBD19	DEG
PLXNC1	DEG
TSHZ2	DEG
RPE65	DEG
NR5A2	DEG
FAM46B	DEG
PNMA5	DEG
XKR7	DEG
MYO3A	DEG
PHF15	DEG
LRRN3	DEG
LMO1	DEG
C8orf4	DEG
SLC4A4	DEG
DLX5	DEG
METTL7A	DEG
FOXA1	DEG
BMP5	DEG
KCTD8	DEG
CDH18	DEG
CARD11	DEG
FNDC5	DEG
ASIC3	DEG
C6orf165	DEG
TCHH	DEG
LECT1	DEG
SULF1	DEG
PTCHD4	DEG
CEACAM21	DEG
CBR3	DEG
SCIMP	DEG
GDF3	DEG
LHX6	DEG
WNT3A	DEG
UCN2	DEG
MBOAT4	DEG
C9orf135	DEG
GALNT3	DEG
WNT8A	DEG
ICA1	DEG
ARHGAP20	DEG
DNAH6	DEG
ARHGEF17	DEG
EDN1	DEG
PHLDA1	DEG
COL11A2	DEG
GSC	DEG
C19orf66	DEG
OLFM3	DEG
HDC	DEG
KAT2B	DEG
SORCS1	DEG
CBLC	DEG
RAX	DEG
ZDHHC22	DEG
KLK8	DEG
AKAP6	DEG
CCDC69	DEG
UNC5C	DEG
LEKR1	DEG
CD33	DEG
TMTC2	DEG
APCDD1L	DEG
YPEL2	DEG
MYOZ3	DEG
ZNF474	DEG
CCDC48	DEG
MYH7	DEG
EN1	DEG
SP8	DEG
FIGNL2	DEG
NPR3	DEG
CRYAA	DEG
RHOXF1	DEG
ZIC4	DEG
METRN	DEG
GLI1	DEG
CPXM2	DEG
CASP10	DEG
HPSE2	DEG
ZNF667	DEG
RAB17	DEG
IFITM10	DEG
MBP	DEG
RSPO2	DEG
RELL2	DEG
PTCHD1	DEG
NDRG1	DEG
SKOR1	DEG
RARB	DEG
EMID1	DEG
NRP1	DEG
LYSMD2	DEG
CLEC4G	DEG
ANKRD34A	DEG
KIAA1244	DEG
LRRC4C	DEG
ALDH1A2	DEG
SMPDL3B	DEG
NR2F1	DEG
ZNF804A	DEG
UTY	DEG
GAB3	DEG
RGS22	DEG
KCNA1	DEG
LAD1	DEG
DMBX1	DEG
AK8	DEG
LSAMP	DEG
PLCE1	DEG
TSPAN32	DEG
DDR2	DEG
CHGA	DEG
NR5A1	DEG
CLVS1	DEG
DMRT2	DEG
OLIG2	DEG
RGS9BP	DEG
DRD4	DEG
TSHZ1	DEG
TERF1	DEG
DDX3Y	DEG
PIK3AP1	DEG
POTEF	DEG
PPM1H	DEG
DMRTC1B	DEG
NHLRC4	DEG
DCST2	DEG
ROBO3	DEG
LAMC3	DEG
SLCO4A1	DEG
GUCY1B3	DEG
KDM6B	DEG
DBX1	DEG
TCEA3	DEG
TACR1	DEG
SLC30A2	DEG
ACTN3	DEG
CRLF1	DEG
UTF1	DEG
FOXO1	DEG
COBL	DEG
C11orf86	DEG
SLC5A2	DEG
ITIH3	DEG
IRX3	DEG
PRDM16	DEG
SMAD7	DEG
GCKR	DEG
NPM2	DEG
ITLN2	DEG
LCN10	DEG
RPS4Y1	DEG
ACSBG1	DEG
CHL1	DEG
PRSS33	DEG
GRID2	DEG
FLT1	DEG
CAMK2A	DEG
HCLS1	DEG
CA4	DEG
ABCA4	DEG
SP7	DEG
FAM5B	DEG
IFI30	DEG
SOWAHD	DEG
CCNI2	DEG
FOLR1	DEG
KDM5D	DEG
C6orf223	DEG
DACH1	DEG
NDST4	DEG
RSPO1	DEG
UNC13A	DEG
ME3	DEG
GJA10	DEG
CD9	DEG
NLRP2	DEG
PAK6	DEG
LCK	DEG
BCL11A	DEG
GAB4	DEG
C7orf58	DEG
LRFN2	DEG
SYT11	DEG
MEIS1	DEG
MEIS2	DEG
ZSCAN10	DEG
CST1	DEG
TNFRSF19	DEG
PRRT2	DEG
CDON	DEG
PLXNA2	DEG
C20orf151	DEG
DNAH1	DEG
F2RL1	DEG
CFB	DEG
RNF152	DEG
PARP12	DEG
SHISA3	DEG
IKZF3	DEG
ZNF516	DEG
NOG	DEG
ARPC4-TTLL3	DEG
ARHGEF35	DEG
POU3F2	DEG
APOBEC3B	DEG
ZFP2	DEG
GATA3	DEG
TEKT4	DEG
COMT	DEG
GLYATL2	DEG
FAM116B	DEG
ODZ4	DEG
CDH6	DEG
TCL1B	DEG
CHRD	DEG
TMPRSS2	DEG
ARHGAP15	DEG
C17orf96	DEG
TF	DEG
WDR64	DEG
CLEC18A	DEG
DNAJC15	DEG
LEFTY1	DEG
SRCIN1	DEG
RIPPLY1	DEG
MPPED1	DEG
VIM	DEG
C1orf94	DEG
LHX2	DEG
BACH2	DEG
EBF3	DEG
SORCS2	DEG
ERVMER34-1	DEG
CAPN13	DEG
GTSF1	DEG
KLHDC1	DEG
BCO2	DEG
KBTBD10	DEG
CORIN	DEG
PDE1C	DEG
OPRL1	DEG
HHIP	DEG
NPY	DEG
USP43	DEG
ZCCHC12	DEG
TNFRSF18	DEG
IMPG1	DEG
KCNQ5	DEG
LRP2	DEG
CYP2S1	DEG
MIXL1	DEG
C9orf128	DEG
MXRA8	DEG
BARHL1	DEG
WLS	DEG
PPIC	DEG
KIAA0895	DEG
CALR3	DEG
ST14	DEG
ZEB1	DEG
RGL3	DEG
TFCP2L1	DEG
IRS4	DEG
SNCB	DEG
C2orf62	DEG
KLKB1	DEG
CRB2	DEG
TRPV6	DEG
UBA7	DEG
KCNJ13	DEG
POMC	DEG
GPR50	DEG
DHH	DEG
TRNP1	DEG
CKMT1B	DEG
S100B	DEG
ZEB2	DEG
ARX	DEG
MPP1	DEG
TLE4	DEG
LRRC7	DEG
WNT10B	DEG
GPA33	DEG
PAX2	DEG
LMX1B	DEG
IGFBP5	DEG
PEG3	DEG
GPR64	DEG
SLC6A16	DEG
PCDH17	DEG
MAF	DEG
FGF10	DEG
A2M	DEG
GLB1L3	DEG
PSORS1C2	DEG
MAFB	DEG
PDE10A	DEG
NOTUM	DEG
CPNE9	DEG
OGDHL	DEG
PDZRN4	DEG
SPOCD1	DEG
STMN4	DEG
TNMD	DEG
RALYL	DEG
TYRP1	DEG
SCUBE3	DEG
COLEC12	DEG
NAALAD2	DEG
C14orf49	DEG
CPLX4	DEG
CYB5A	DEG
APBA1	DEG
PAPPA	DEG
AGXT2L1	DEG
CDHR5	DEG
SLC30A4	DEG
RGS20	DEG
NTRK2	DEG
UBE2QL1	DEG
CTHRC1	DEG
HAPLN1	DEG
IQCA1	DEG
HSD11B2	DEG
NCALD	DEG
TC2N	DEG
SOX10	DEG
FBN1	DEG
AHNAK	DEG
TACSTD2	DEG
DLX6	DEG
NTS	DEG
DMRT3	DEG
SYT5	DEG
GFAP	DEG
TEKT2	DEG
LCN2	DEG
MLPH	DEG
CACNA2D3	DEG
NR3C1	DEG
RBM47	DEG
SAMD5	DEG
CCNG2	DEG
C1orf168	DEG
SLC22A2	DEG
COL8A2	DEG
FEZF2	DEG
EPHA8	DEG
PDCD1	DEG
S100A11	DEG
GAL	DEG
WDR65	DEG
RFTN2	DEG
GPR111	DEG
UTS2R	DEG
SCGN	DEG
ZNF862	DEG
EBI3	DEG
PLEKHF1	DEG
ADHFE1	DEG
RLBP1	DEG
RAB19	DEG
SEMA3C	DEG
PLEKHG1	DEG
ARSJ	DEG
PRR25	DEG
CCDC164	DEG
CHRM4	DEG
MT1F	DEG
RBPMS2	DEG
TCTE1	DEG
TMEM125	DEG
TMEM117	DEG
PRR15	DEG
LRRC4B	DEG
GALNT5	DEG
CKMT1A	DEG
ZNF503	DEG
RFPL2	DEG
BARHL2	DEG
SLIT1	DEG
MARVELD3	DEG
ANO3	DEG
UCN	DEG
VTN	DEG
RAMP2	DEG
GUCY2C	DEG
NXF2B	DEG
LMOD1	DEG
FBP1	DEG
TBX2	DEG
PLA2G4C	DEG
TMEM132C	DEG
HIST1H1E	DEG
PODXL	DEG
GPR141	DEG
RUNDC3A	DEG
NPY2R	DEG
ZIC1	DEG
FGF9	DEG
OVGP1	DEG
C1orf228	DEG
TUBB8	DEG
ILDR2	DEG
LMO7	DEG
BEAN1	DEG
ENPP2	DEG
KCNK1	DEG
CDH10	DEG
TRIML2	DEG
PARP14	DEG
AVPR1A	DEG
WFDC2	DEG
ST8SIA2	DEG
NRG1	DEG
THBS3	DEG
KIF25	DEG
ALX4	DEG
ATP1A3	DEG
SCN3A	DEG
ESRP2	DEG
CCDC92	DEG
CCK	DEG
CRYGD	DEG
ARHGAP9	DEG
SEPT12	DEG
EPHA4	DEG
SMAD6	DEG
KIAA0040	DEG
PCDH9	DEG
DNAJA4	DEG
SIX3	DEG
SHANK1	DEG
MITF	DEG
THBS2	DEG
CDKN2C	DEG
GABRG3	DEG
RIPPLY2	DEG
IER5L	DEG
NRN1	DEG
RIMBP2	DEG
OTX1	DEG
EDNRA	DEG
OR2A7	DEG
C10orf140	DEG
SCG3	DEG
EPB41L4B	DEG
OSTalpha	DEG
ZFYVE28	DEG
ATP10A	DEG
NME9	DEG
IRX5	DEG
CACNG6	DEG
C3	DEG
CADM3	DEG
ZAR1	DEG
ACOT12	DEG
DNAH10	DEG
ATP6AP1L	DEG
ARC	DEG
FMOD	DEG
KIAA1804	DEG
GDF7	DEG
GAP43	DEG
CAMK1G	DEG
TFAP2A	DEG
DMRTA2	DEG
SGK110	DEG
SOCS2	DEG
BCL6	DEG
FOXG1	DEG
AMDHD1	DEG
PCDH1	DEG
TBC1D26	DEG
PLA2G2A	DEG
CACNA2D1	DEG
ENPP3	DEG
CR2	DEG
RPA4	DEG
HGC6.3	DEG
TSSK3	DEG
DLC1	DEG
GABRD	DEG
ARMC3	DEG
MKL2	Not DEG
CD109	Not DEG
ABTB1	Not DEG
MAST2	Not DEG
KAT5	Not DEG
WWC2	Not DEG
CD163	Not DEG
UBE2Z	Not DEG
RGPD4	Not DEG
PHYHIPL	Not DEG
ELF2	Not DEG
RAB14	Not DEG
IZUMO1	Not DEG
TMIE	Not DEG
PRDX2	Not DEG
APOA2	Not DEG
AQP4	Not DEG
PSMC6	Not DEG
SLC2A8	Not DEG
MKNK1	Not DEG
C12orf4	Not DEG
CPLX1	Not DEG
SUV39H1	Not DEG
USF1	Not DEG
R3HDM2	Not DEG
USP29	Not DEG
TMPPE	Not DEG
HIST1H2BC	Not DEG
TTLL2	Not DEG
GBP5	Not DEG
ALG5	Not DEG
DBNDD1	Not DEG
RBP1	Not DEG
ITGA5	Not DEG
SNX5	Not DEG
ANKRD16	Not DEG
GTSE1	Not DEG
KCNIP2	Not DEG
STX2	Not DEG
TRIM23	Not DEG
RSPH9	Not DEG
CAMK2N1	Not DEG
CLCC1	Not DEG
CNFN	Not DEG
ZMYND8	Not DEG
MAP1A	Not DEG
CPXM1	Not DEG
XPA	Not DEG
RAB3IP	Not DEG
NDUFAF2	Not DEG
SRCAP	Not DEG
TAT	Not DEG
TNNT2	Not DEG
H2AFJ	Not DEG
RRAS2	Not DEG
GSDMD	Not DEG
TMEM55A	Not DEG
DUSP12	Not DEG
EFHB	Not DEG
DCTPP1	Not DEG
FBXL17	Not DEG
ETV1	Not DEG
NDUFV2	Not DEG
TRPC1	Not DEG
CLSPN	Not DEG
PSMD14	Not DEG
DDI2	Not DEG
IAH1	Not DEG
WNT5A	Not DEG
GPR84	Not DEG
SEZ6L	Not DEG
ARFIP2	Not DEG
DTX3L	Not DEG
PIP5K1A	Not DEG
LITAF	Not DEG
MMEL1	Not DEG
FBXO41	Not DEG
HTR1D	Not DEG
HBP1	Not DEG
VAMP2	Not DEG
ZNF687	Not DEG
MEX3C	Not DEG
PCDH11X	Not DEG
SOCS6	Not DEG
OSGEPL1	Not DEG
ITGB4	Not DEG
HERC3	Not DEG
CROT	Not DEG
ANKRD36B	Not DEG
ARHGAP31	Not DEG
CCDC121	Not DEG
HSPA9	Not DEG
CASP3	Not DEG
XYLT2	Not DEG
WWTR1	Not DEG
GGT5	Not DEG
ERCC3	Not DEG
TLL2	Not DEG
RAVER2	Not DEG
PGAP2	Not DEG
TXNDC11	Not DEG
SUOX	Not DEG
DNM2	Not DEG
GNB2	Not DEG
KLK6	Not DEG
CENPJ	Not DEG
CLSTN2	Not DEG
MTRNR2L6	Not DEG
TRIM44	Not DEG
NCOA3	Not DEG
GPC3	Not DEG
NAGK	Not DEG
SLC12A5	Not DEG
CD200R1	Not DEG
MED6	Not DEG
ORC6	Not DEG
FAM131B	Not DEG
PRELP	Not DEG
TRAPPC12	Not DEG
SLC25A38	Not DEG
WHSC1L1	Not DEG
PLAGL2	Not DEG
MYD88	Not DEG
HSH2D	Not DEG
SLC38A4	Not DEG
ZNF281	Not DEG
DCP2	Not DEG
LSM11	Not DEG
ERRFI1	Not DEG
PRH2	Not DEG
AGTRAP	Not DEG
C3orf71	Not DEG
PHF13	Not DEG
PITPNC1	Not DEG
KRT10	Not DEG
CXorf26	Not DEG
FABP5	Not DEG
MMP23B	Not DEG
DLX2	Not DEG
FGD1	Not DEG
APBB1	Not DEG
LEAP2	Not DEG
GLO1	Not DEG
RGS14	Not DEG
LAMP2	Not DEG
NCL	Not DEG
RCSD1	Not DEG
TTC28	Not DEG
HNRNPH3	Not DEG
RUSC2	Not DEG
POLR3GL	Not DEG
RAF1	Not DEG
UBXN4	Not DEG
SYS1	Not DEG
FAM108C1	Not DEG
GPC6	Not DEG
RUFY3	Not DEG
WIPF3	Not DEG
ANG	Not DEG
C9orf91	Not DEG
DEGS1	Not DEG
MEN1	Not DEG
COIL	Not DEG
TMEM116	Not DEG
ZNF3	Not DEG
ICAM2	Not DEG
CXCR6	Not DEG
GJD4	Not DEG
FBXW10	Not DEG
SLC36A1	Not DEG
PCDHB9	Not DEG
STOX1	Not DEG
C14orf129	Not DEG
DSG3	Not DEG
SPERT	Not DEG
KDELR1	Not DEG
PCDHB6	Not DEG
KPNA2	Not DEG
ZNF705D	Not DEG
AEBP2	Not DEG
RAB32	Not DEG
ITGA2B	Not DEG
CDHR4	Not DEG
RFC2	Not DEG
ZFP1	Not DEG
SLC5A9	Not DEG
IRS2	Not DEG
ATP12A	Not DEG
MUL1	Not DEG
JAM2	Not DEG
KATNB1	Not DEG
AUH	Not DEG
ZNF226	Not DEG
AP4M1	Not DEG
TMEM130	Not DEG
ATP6V1B2	Not DEG
AGBL3	Not DEG
RCOR3	Not DEG
ZBTB25	Not DEG
RPL27	Not DEG
PLEKHJ1	Not DEG
ADH5	Not DEG
COL4A6	Not DEG
CCT5	Not DEG
SPRYD7	Not DEG
TSTD1	Not DEG
SH3GL1	Not DEG
MRPS24	Not DEG
TLR3	Not DEG
SLCO1A2	Not DEG
CD300LG	Not DEG
VASP	Not DEG
GPSM3	Not DEG
EFNA4	Not DEG
KCNA6	Not DEG
CHMP4A	Not DEG
NEK3	Not DEG
RNF41	Not DEG
MTHFD2	Not DEG
COX6C	Not DEG
FAM82A1	Not DEG
G6PD	Not DEG
UBE3B	Not DEG
PPARA	Not DEG
PRKCQ	Not DEG
CKS2	Not DEG
ARHGAP44	Not DEG
ACTR8	Not DEG
GRAMD2	Not DEG
SEPSECS	Not DEG
ANXA4	Not DEG
MRPS15	Not DEG
ITGA10	Not DEG
JKAMP	Not DEG
PRR5	Not DEG
ASNA1	Not DEG
FBXO28	Not DEG
LRRTM2	Not DEG
AARS	Not DEG
FOSL1	Not DEG
PKHD1	Not DEG
ART5	Not DEG
LOC646851	Not DEG
DPY19L3	Not DEG
LDLRAD3	Not DEG
ABHD10	Not DEG
STAMBP	Not DEG
ALKBH8	Not DEG
RNF166	Not DEG
ZNF835	Not DEG
EPX	Not DEG
GOLT1B	Not DEG
CPA5	Not DEG
PPFIA3	Not DEG
GRIK3	Not DEG
JAK1	Not DEG
CTXN3	Not DEG
DGCR14	Not DEG
PPIF	Not DEG
DHRS7B	Not DEG
TPTE	Not DEG
FOXD2	Not DEG
RNF187	Not DEG
MON1B	Not DEG
CYTIP	Not DEG
COQ6	Not DEG
GULP1	Not DEG
C4orf46	Not DEG
PDE4B	Not DEG
GDI2	Not DEG
LAMA5	Not DEG
NFAT5	Not DEG
RNMT	Not DEG
SLC39A8	Not DEG
2020-03-11	Not DEG
MSL3	Not DEG
TUBB2B	Not DEG
INSR	Not DEG
ZMYND11	Not DEG
HNRNPA0	Not DEG
C19orf70	Not DEG
PCNP	Not DEG
ANKRD23	Not DEG
PDX1	Not DEG
CLCN2	Not DEG
C1orf192	Not DEG
ACSM2A	Not DEG
SEMA4D	Not DEG
WDFY3	Not DEG
GOLGA8B	Not DEG
CBX5	Not DEG
RAPGEF4	Not DEG
SLC25A37	Not DEG
NXT2	Not DEG
PTGER3	Not DEG
GMDS	Not DEG
TMEM51	Not DEG
HGSNAT	Not DEG
GIMAP8	Not DEG
ASCC1	Not DEG
INPP5A	Not DEG
ANTXR2	Not DEG
SLC2A14	Not DEG
PTH2R	Not DEG
RPS6KA2	Not DEG
NEK8	Not DEG
KLK7	Not DEG
C8orf76	Not DEG
NDUFA7	Not DEG
SCAND1	Not DEG
MAP3K4	Not DEG
MAPRE1	Not DEG
TBC1D16	Not DEG
MAP9	Not DEG
SLC25A3	Not DEG
CWF19L2	Not DEG
TMEM9	Not DEG
FLRT1	Not DEG
GYLTL1B	Not DEG
GPM6B	Not DEG
GJC3	Not DEG
SKP1	Not DEG
CNBP	Not DEG
TROAP	Not DEG
SLC23A2	Not DEG
RPL31	Not DEG
CCNH	Not DEG
ACBD3	Not DEG
CDCP2	Not DEG
PRDM10	Not DEG
SYNJ2BP-COX16	Not DEG
ZNF707	Not DEG
TMEM41A	Not DEG
TEKT3	Not DEG
TNXB	Not DEG
ARID4A	Not DEG
EIF4B	Not DEG
TARBP1	Not DEG
GABRA2	Not DEG
MMP15	Not DEG
IL12A	Not DEG
ARL10	Not DEG
PAPOLG	Not DEG
PIGF	Not DEG
TNNC2	Not DEG
CCDC86	Not DEG
GTF2IRD2B	Not DEG
GPR110	Not DEG
C5orf24	Not DEG
SNX3	Not DEG
C1orf111	Not DEG
SNX2	Not DEG
KCNE3	Not DEG
ENTPD6	Not DEG
ZNF549	Not DEG
HNRNPK	Not DEG
GSTA1	Not DEG
ST3GAL6	Not DEG
ZNF583	Not DEG
MID2	Not DEG
ODZ1	Not DEG
MSANTD1	Not DEG
CNEP1R1	Not DEG
TNRC6A	Not DEG
ARIH2	Not DEG
FAM213B	Not DEG
ATP1B4	Not DEG
DCAF16	Not DEG
SEPW1	Not DEG
GNAT2	Not DEG
SPATA17	Not DEG
THRB	Not DEG
TAPBP	Not DEG
CHMP3	Not DEG
PHF1	Not DEG
VCPIP1	Not DEG
TXNDC2	Not DEG
C19orf76	Not DEG
DERL1	Not DEG
CXCL6	Not DEG
ENAH	Not DEG
ARL5B	Not DEG
PHC3	Not DEG
CECR6	Not DEG
MIER3	Not DEG
DOK6	Not DEG
TMEM110	Not DEG
PROM1	Not DEG
SLC29A2	Not DEG
TNFRSF21	Not DEG
PPP1CB	Not DEG
SPATA6	Not DEG
USP19	Not DEG
PNPO	Not DEG
C16orf59	Not DEG
ZNF718	Not DEG
VN1R1	Not DEG
KBTBD8	Not DEG
SUPT4H1	Not DEG
PALM3	Not DEG
FAM171B	Not DEG
WDR27	Not DEG
JAK2	Not DEG
SYDE2	Not DEG
SMEK1	Not DEG
C2orf63	Not DEG
HNRNPA1L2	Not DEG
NR4A2	Not DEG
GJB7	Not DEG
TAS2R38	Not DEG
GSPT2	Not DEG
CCDC51	Not DEG
C16orf57	Not DEG
STC2	Not DEG
ACTR1B	Not DEG
SLC7A3	Not DEG
PMFBP1	Not DEG
NPR2	Not DEG
SEC24A	Not DEG
PFN2	Not DEG
CACNA1S	Not DEG
CAPZA2	Not DEG
FBLN2	Not DEG
SMARCB1	Not DEG
PHC2	Not DEG
MEX3D	Not DEG
MAP7D1	Not DEG
TNFRSF10B	Not DEG
KCNT1	Not DEG
SMARCA4	Not DEG
IFNAR2	Not DEG
HGF	Not DEG
MTM1	Not DEG
BAX	Not DEG
PLCG1	Not DEG
STARD3	Not DEG
BTBD6	Not DEG
ZNF674	Not DEG
ZNF575	Not DEG
LOC649330	Not DEG
UBLCP1	Not DEG
DPP10	Not DEG
ACTL6A	Not DEG
KRCC1	Not DEG
WNT7A	Not DEG
PELI2	Not DEG
RNF123	Not DEG
RLF	Not DEG
NQO2	Not DEG
C11orf95	Not DEG
KLRD1	Not DEG
PKIG	Not DEG
DZIP1L	Not DEG
ACBD7	Not DEG
METTL11A	Not DEG
HYLS1	Not DEG
PXDC1	Not DEG
TMEM208	Not DEG
BRPF3	Not DEG
IRF2BP2	Not DEG
NKD1	Not DEG
ESYT2	Not DEG
TBC1D5	Not DEG
GLB1L2	Not DEG
IFI35	Not DEG
H2AFZ	Not DEG
DCAF13	Not DEG
NAPA	Not DEG
FCGR1A	Not DEG
SNX10	Not DEG
CCBP2	Not DEG
CHP	Not DEG
LDHAL6A	Not DEG
PLOD2	Not DEG
FAM21A	Not DEG
HNRNPUL1	Not DEG
PRSS16	Not DEG
BCL2L11	Not DEG
IZUMO4	Not DEG
BICC1	Not DEG
TBL3	Not DEG
DDX51	Not DEG
RIN1	Not DEG
ZNF841	Not DEG
EDAR	Not DEG
PLXNB3	Not DEG
ASPM	Not DEG
OXA1L	Not DEG
TAF7	Not DEG
SLC13A4	Not DEG
TPM2	Not DEG
C12orf26	Not DEG
CUL1	Not DEG
POLR2J	Not DEG
CXorf40B	Not DEG
CD63	Not DEG
FAM13B	Not DEG
RBM34	Not DEG
POC1B	Not DEG
SLC38A5	Not DEG
KIAA1109	Not DEG
ELP3	Not DEG
COX6B2	Not DEG
TUBD1	Not DEG
ZBED6	Not DEG
NT5DC2	Not DEG
APOL6	Not DEG
PDDC1	Not DEG
ARHGAP22	Not DEG
C1orf100	Not DEG
KLF10	Not DEG
OR2A25	Not DEG
CCHCR1	Not DEG
MORN4	Not DEG
NIN	Not DEG
CCNB3	Not DEG
RPL39L	Not DEG
MIS12	Not DEG
KDM4D	Not DEG
TRAM1L1	Not DEG
MFSD4	Not DEG
SH3BP2	Not DEG
JAKMIP2	Not DEG
MARK4	Not DEG
PLSCR2	Not DEG
SUGP1	Not DEG
FAT3	Not DEG
AGPAT5	Not DEG
DDX18	Not DEG
BNC1	Not DEG
FAM53A	Not DEG
TNFAIP8	Not DEG
TM6SF1	Not DEG
CHD4	Not DEG
SLC22A31	Not DEG
FTH1	Not DEG
PTPRM	Not DEG
SYNPO2	Not DEG
RPL3	Not DEG
DAB1	Not DEG
ATP2C2	Not DEG
EYS	Not DEG
SH3BP1	Not DEG
RBP4	Not DEG
SPTSSA	Not DEG
PNISR	Not DEG
CHIC1	Not DEG
MYBL1	Not DEG
NPFF	Not DEG
RPS23	Not DEG
C10orf57	Not DEG
ZNFX1	Not DEG
CAMSAP3	Not DEG
CREB3L2	Not DEG
ISM2	Not DEG
KLRK1	Not DEG
DMXL1	Not DEG
ITFG1	Not DEG
PDE12	Not DEG
WIPF1	Not DEG
GRM2	Not DEG
ALDH9A1	Not DEG
FAM123A	Not DEG
ROBO2	Not DEG
OBFC1	Not DEG
RPS6	Not DEG
ARL9	Not DEG
UBP1	Not DEG
ZWINT	Not DEG
SERPINI2	Not DEG
POLR1C	Not DEG
ARL15	Not DEG
CEBPE	Not DEG
SSH3	Not DEG
PPP1R10	Not DEG
SERINC2	Not DEG
PCDHA9	Not DEG
TRIM62	Not DEG
PRPF38B	Not DEG
DLX4	Not DEG
CENPL	Not DEG
APOL4	Not DEG
TACC2	Not DEG
ZNF195	Not DEG
ATP8B1	Not DEG
ZNF84	Not DEG
EPHA2	Not DEG
ACPL2	Not DEG
DHX36	Not DEG
TUBB1	Not DEG
ADPGK	Not DEG
EEF1D	Not DEG
PARP3	Not DEG
TSN	Not DEG
NBPF7	Not DEG
APEX1	Not DEG
FNDC1	Not DEG
TPST1	Not DEG
CIC	Not DEG
PPP4C	Not DEG
NKG7	Not DEG
TEAD1	Not DEG
CTH	Not DEG
RPS6KB2	Not DEG
RBPJ	Not DEG
RUNX1	Not DEG
SMARCC2	Not DEG
ANAPC2	Not DEG
BHMT2	Not DEG
APOPT1	Not DEG
HIST1H4E	Not DEG
C11orf88	Not DEG
RPS11	Not DEG
AVPI1	Not DEG
GDNF	Not DEG
THRAP3	Not DEG
CHRM2	Not DEG
USP3	Not DEG
LOC100329135	Not DEG
HDAC10	Not DEG
EXD2	Not DEG
IDH3G	Not DEG
IMPAD1	Not DEG
CALHM2	Not DEG
ARL17A	Not DEG
NHP2	Not DEG
BSG	Not DEG
PTHLH	Not DEG
CYP20A1	Not DEG
DNAJC12	Not DEG
TXLNA	Not DEG
GLUD1	Not DEG
FRA10AC1	Not DEG
OAZ3	Not DEG
C1QTNF9	Not DEG
SCO1	Not DEG
LOC100130705	Not DEG
RPS4X	Not DEG
RCE1	Not DEG
COL18A1	Not DEG
SF3B14	Not DEG
UBN1	Not DEG
MCART6	Not DEG
HIST2H3D	Not DEG
KLF1	Not DEG
SERPINB6	Not DEG
SEPT14	Not DEG
DOK5	Not DEG
MIS18BP1	Not DEG
NRXN1	Not DEG
C1orf141	Not DEG
HSPE1-MOB4	Not DEG
CNTRL	Not DEG
MCM5	Not DEG
OGFOD1	Not DEG
GPR61	Not DEG
MRPL54	Not DEG
UBE2D2	Not DEG
C6orf57	Not DEG
LONRF3	Not DEG
IFIT1B	Not DEG
ALG9	Not DEG
ZNF664-FAM101A	Not DEG
PDK3	Not DEG
ZNF93	Not DEG
PLK4	Not DEG
ALDH16A1	Not DEG
NTRK3	Not DEG
AKT1S1	Not DEG
LTA4H	Not DEG
FLJ22184	Not DEG
MPP4	Not DEG
RPN2	Not DEG
RPP14	Not DEG
PCDH18	Not DEG
ZNF99	Not DEG
PAK4	Not DEG
SRPK3	Not DEG
AKD1	Not DEG
PER3	Not DEG
NUP133	Not DEG
C21orf56	Not DEG
NUPL2	Not DEG
ACVRL1	Not DEG
NBN	Not DEG
PATZ1	Not DEG
RASL10B	Not DEG
MMP24	Not DEG
ZNF114	Not DEG
GAS2L1	Not DEG
SMAD1	Not DEG
HSD17B11	Not DEG
XPOT	Not DEG
RDH12	Not DEG
PCDHB15	Not DEG
UBE2W	Not DEG
LRRN4	Not DEG
MORC3	Not DEG
DYRK3	Not DEG
GSTZ1	Not DEG
ARHGAP28	Not DEG
SUFU	Not DEG
MIA3	Not DEG
CLCN6	Not DEG
GNPAT	Not DEG
PTGER1	Not DEG
PPID	Not DEG
DRAM1	Not DEG
ARHGAP42	Not DEG
ACRV1	Not DEG
CTTNBP2NL	Not DEG
HDAC11	Not DEG
ZDHHC18	Not DEG
RRP8	Not DEG
HIST1H3B	Not DEG
FAT2	Not DEG
C20orf3	Not DEG
KDM5A	Not DEG
SLC3A2	Not DEG
ATP13A4	Not DEG
[truncated: 14,614 more rows]
