# Supplementary material for: Modeling expression ranks for noise-tolerant differential expression analysis of scRNA-seq data
Source: HighWire-hosted journal article supplement (doi:10.1101/gr.267070.120), 2021-03-05
Supplement: Supplemental_Table_S8.xlsx [file Supplemental_Table_S8.xlsx]

## Sheet: Trapnell Bulk Dataset (T0 vs. T
Supplemental Table S8: Bulk based DEG calls for the Trapnell dataset (replicates T0 vs. T24).
Gene Symbol	DEG Call
CSMD2	DEG
KIF26B	DEG
CASZ1	DEG
MAN1C1	DEG
KCNQ4	DEG
KIF2C	DEG
DEPDC1	DEG
MYBPHL	DEG
TSPAN2	DEG
CASQ2	DEG
KCNN3	DEG
NUF2	DEG
FMO2	DEG
CACNA1S	DEG
KIF14	DEG
C1ORF95	DEG
SAMD11	DEG
HES4	DEG
TNFRSF18	DEG
SMIM1	DEG
TNFRSF25	DEG
ANGPTL7	DEG
CELA2B	DEG
HTR1D	DEG
MYOM3	DEG
TRIM63	DEG
FABP3	DEG
FAM167B	DEG
FNDC5	DEG
CLSPN	DEG
CDCA8	DEG
POU3F1	DEG
MYCL	DEG
FOXO6	DEG
CDC20	DEG
ORC1	DEG
PODN	DEG
MROH7	DEG
PCSK9	DEG
TACSTD2	DEG
SYPL2	DEG
WNT2B	DEG
PTPN22	DEG
FAM46C	DEG
FAM72D	DEG
HFE2	DEG
BNIPL	DEG
CRABP2	DEG
ATP1A4	DEG
ATP1A2	DEG
OLFML2B	DEG
GPA33	DEG
FMO3	DEG
MYOC	DEG
ASPM	DEG
TNNI1	DEG
LAD1	DEG
LMOD1	DEG
MYOG	DEG
PIK3C2B	DEG
TMCC2	DEG
CDK18	DEG
NEK2	DEG
VASH2	DEG
TLR5	DEG
ACTA1	DEG
AGT	DEG
ACTN2	DEG
GREM2	DEG
MAP1LC3C	DEG
NCKAP5	DEG
RNF144A	DEG
OTOF	DEG
TRIM54	DEG
REEP1	DEG
CKAP2L	DEG
NEB	DEG
SCN1A	DEG
SPC25	DEG
CCDC141	DEG
TTN	DEG
MYL1	DEG
HJURP	DEG
CENPA	DEG
MAPRE3	DEG
CYP1B1	DEG
TMEM178A	DEG
PKDCC	DEG
PLGLB1	DEG
SMYD1	DEG
MAL	DEG
ADRA2B	DEG
IL1RL1	DEG
BCL2L11	DEG
FBLN7	DEG
IFIH1	DEG
STAT4	DEG
IGFBP5	DEG
PRKAG3	DEG
INHA	DEG
ASIC4	DEG
TM4SF20	DEG
CCL20	DEG
CHRND	DEG
CHRNG	DEG
CADM2	DEG
CAND2	DEG
GRIP2	DEG
ARPP21	DEG
KLHL40	DEG
CHDH	DEG
FAM107A	DEG
LRIG1	DEG
PDZRN3	DEG
KY	DEG
CLSTN2	DEG
SPSB4	DEG
SLC7A14	DEG
PLD1	DEG
TNFSF10	DEG
PEX5L	DEG
HES1	DEG
SGOL1	DEG
RBMS3-AS3	DEG
TNNC1	DEG
SEMA3G	DEG
LMOD3	DEG
PDZRN3-AS1	DEG
LXN	DEG
RARRES1	DEG
NCAPG	DEG
SLC4A4	DEG
GPRIN3	DEG
BANK1	DEG
NEIL3	DEG
IGFBP7-AS1	DEG
EREG	DEG
PARM1	DEG
PLAC8	DEG
CENPE	DEG
NPNT	DEG
MND1	DEG
HGFAC	DEG
SULT1B1	DEG
PPBP	DEG
PF4	DEG
CXCL5	DEG
ADH1B	DEG
C4ORF17	DEG
DDIT4L	DEG
CDC25C	DEG
RANBP3L	DEG
GDNF	DEG
GDNF-AS1	DEG
HMGCS1	DEG
ESM1	DEG
MIR145	DEG
MIR143HG	DEG
ARHGEF37	DEG
CAMK2A	DEG
HMMR	DEG
DRD1	DEG
N4BP3	DEG
F13A1	DEG
TTK	DEG
IL20RA	DEG
FAM65B	DEG
PACSIN1	DEG
TMEM217	DEG
APOBEC2	DEG
PKHD1	DEG
COL21A1	DEG
FILIP1	DEG
SNAP91	DEG
GABRR1	DEG
CLVS2	DEG
TPD52L1	DEG
SLC2A12	DEG
MYB	DEG
FNDC1	DEG
SERPINB9	DEG
ID4	DEG
TCF19	DEG
C2	DEG
C4A	DEG
TNXB	DEG
C4B	DEG
KCNK17	DEG
CAPN11	DEG
MIR133B	DEG
KLHL31	DEG
RRAGD	DEG
HS3ST5	DEG
FAM26F	DEG
VGLL2	DEG
RSPO3	DEG
MTFR2	DEG
DLL1	DEG
AKR1B10	DEG
COBL	DEG
WIPF3	DEG
RASA4	DEG
DENND2A	DEG
CNPY1	DEG
CYP2W1	DEG
SFRP4	DEG
MYO1G	DEG
IGFBP1	DEG
FZD9	DEG
ZP3	DEG
CD36	DEG
STEAP4	DEG
NPTX2	DEG
ACHE	DEG
VGF	DEG
TSPAN33	DEG
SSPO	DEG
RARRES2	DEG
KCNH2	DEG
EN2	DEG
BLK	DEG
ST18	DEG
BAALC	DEG
COL14A1	DEG
FBXO32	DEG
SLA	DEG
FAM167A	DEG
PDGFRL	DEG
CDCA2	DEG
PBK	DEG
PURG	DEG
SOX17	DEG
TRPA1	DEG
JPH1	DEG
MAFA	DEG
MAPK15	DEG
FAM83H-AS1	DEG
GNA14	DEG
TMOD1	DEG
KCNT1	DEG
FRMPD1	DEG
TMEM252	DEG
GADD45G	DEG
ASPN	DEG
OLFML2A	DEG
AIF1L	DEG
TMEM8C	DEG
LCNL1	DEG
SAPCD2	DEG
NRARP	DEG
ARHGAP6	DEG
GPR64	DEG
CNKSR2	DEG
SMPX	DEG
KIF4A	DEG
NLGN3	DEG
TMEM255A	DEG
HS6ST2	DEG
ATP2B3	DEG
FAM9C	DEG
ITGB1BP2	DEG
LPAR4	DEG
XKRX	DEG
APLN	DEG
LINC00087	DEG
GOLGA7B	DEG
LINC00704	DEG
MCM10	DEG
RASSF4	DEG
TMEM26	DEG
LDB3	DEG
ACTA2	DEG
PIK3AP1	DEG
CRTAC1	DEG
RBM20	DEG
AFAP1L2	DEG
MKX	DEG
RASGEF1A	DEG
VSTM4	DEG
C10ORF71	DEG
LINC00948	DEG
CDK1	DEG
SYNPO2L	DEG
ACTA2-AS1	DEG
CEP55	DEG
ANKRD2	DEG
SFRP5	DEG
ADRA2A	DEG
PLEKHS1	DEG
MKI67	DEG
GPR123	DEG
GLYATL1	DEG
DLG2	DEG
PDE2A	DEG
MRVI1	DEG
INSC	DEG
RARRES3	DEG
TM7SF2	DEG
IFITM1	DEG
TNNT3	DEG
TNNI2	DEG
CDKN1C	DEG
KCNJ11	DEG
FIBIN	DEG
FAM180B	DEG
ZP1	DEG
SLC15A3	DEG
LRRN4CL	DEG
HRASLS5	DEG
CDC42BPG	DEG
CDCA5	DEG
CARNS1	DEG
GAL	DEG
P2RY2	DEG
CASP1	DEG
SLN	DEG
CCDC153	DEG
ADAMTS15	DEG
LRRC43	DEG
ANO2	DEG
ERBB3	DEG
NTF3	DEG
TAS2R31	DEG
MGP	DEG
VDR	DEG
GRASP	DEG
LINC00592	DEG
KRT5	DEG
STAC3	DEG
TMEM119	DEG
DCLK1	DEG
MTUS2	DEG
SKA3	DEG
LINC00364	DEG
NRXN3	DEG
NDRG2	DEG
TRIM9	DEG
EGLN3	DEG
POLE2	DEG
TGFB3	DEG
DIO2	DEG
SERPINA12	DEG
EXOC3L4	DEG
TNFAIP2	DEG
CKB	DEG
ATP8B4	DEG
CASC5	DEG
BMF	DEG
C2CD4A	DEG
FBXL22	DEG
USP3-AS1	DEG
RGMA	DEG
RBFOX1	DEG
GPR56	DEG
PPL	DEG
IL34	DEG
CBFA2T3	DEG
CACNA1H	DEG
RPL3L	DEG
PKMYT1	DEG
SRL	DEG
SEC14L5	DEG
QPRT	DEG
MYLPF	DEG
COX6A2	DEG
SHCBP1	DEG
MT1E	DEG
MT1JP	DEG
MT1A	DEG
MT1L	DEG
MT2A	DEG
MT1M	DEG
MT1F	DEG
MT1G	DEG
BEAN1	DEG
RRAD	DEG
HSD11B2	DEG
DBNDD1	DEG
CACNG4	DEG
P2RX1	DEG
PLXDC1	DEG
RGS9	DEG
ABCA9	DEG
ALOX15B	DEG
MYH8	DEG
MYH1	DEG
MYH2	DEG
MYH3	DEG
MFAP4	DEG
SLC47A2	DEG
ALDH3A1	DEG
CCDC144CP	DEG
KCNJ12	DEG
UNC45B	DEG
KRT15	DEG
NAGS	DEG
FAM171A2	DEG
KIF18B	DEG
MYL4	DEG
SCN4A	DEG
CACNG1	DEG
SSTR2	DEG
SMIM5	DEG
SECTM1	DEG
UTS2R	DEG
MYOM1	DEG
COLEC12	DEG
LINC00669	DEG
ZBTB7C	DEG
SKA1	DEG
CCDC68	DEG
C3	DEG
WDR62	DEG
RYR1	DEG
PTPRH	DEG
SHC2	DEG
SEMA6B	DEG
OLFM2	DEG
CNN1	DEG
ISYNA1	DEG
LINC00906	DEG
RINL	DEG
PSG1	DEG
CADM4	DEG
BCAM	DEG
APOE	DEG
APOC1	DEG
CKM	DEG
CA11	DEG
HRC	DEG
MYBPC2	DEG
FPR1	DEG
HAS1	DEG
CACNG6	DEG
SBK2	DEG
BPI	DEG
ADAM33	DEG
RASSF2	DEG
ID1	DEG
GDF5	DEG
EMILIN3	DEG
WISP2	DEG
TNNC2	DEG
SNORD12C	DEG
PTGIS	DEG
C20ORF166-AS1	DEG
SLCO4A1	DEG
NKAIN4	DEG
C20ORF195	DEG
CYYR1	DEG
JAM2	DEG
GRIK1-AS1	DEG
ICOSLG	DEG
AIRE	DEG
GNAZ	DEG
EMID1	DEG
CELSR1	DEG
SLC7A4	DEG
MIAT	DEG
INPP5J	DEG
APOL5	DEG
APOL4	DEG
CSDC2	DEG
RIBC2	DEG
CHKB	DEG
SGIP1	Not DEG
CLIC4	Not DEG
NECAP2	Not DEG
SLC45A1	Not DEG
DBT	Not DEG
TGFBR3	Not DEG
RFWD2	Not DEG
C1ORF21	Not DEG
PRUNE	Not DEG
LIN9	Not DEG
PRDM16	Not DEG
C1ORF159	Not DEG
CAMTA1	Not DEG
PRKCZ	Not DEG
ICMT	Not DEG
EPHB2	Not DEG
PINK1	Not DEG
USP48	Not DEG
PINK1-AS	Not DEG
KHDRBS1	Not DEG
EYA3	Not DEG
EPB41	Not DEG
PUM1	Not DEG
NUDC	Not DEG
STMN1	Not DEG
THRAP3	Not DEG
SFPQ	Not DEG
MACF1	Not DEG
PTPRF	Not DEG
TRABD2B	Not DEG
RNF220	Not DEG
GPBP1L1	Not DEG
TCEANC2	Not DEG
SCP2	Not DEG
RAB3B	Not DEG
USP24	Not DEG
FAF1	Not DEG
FGGY	Not DEG
NFIA	Not DEG
USP1	Not DEG
CACHD1	Not DEG
LEPR	Not DEG
ITGB3BP	Not DEG
NEGR1	Not DEG
LRRC7	Not DEG
ST6GALNAC3	Not DEG
PIGK	Not DEG
DDAH1	Not DEG
LRRC8C	Not DEG
GCLM	Not DEG
FAM69A	Not DEG
NTNG1	Not DEG
PHTF1	Not DEG
RAP1A	Not DEG
GNAI3	Not DEG
RHOC	Not DEG
NOTCH2	Not DEG
WDR3	Not DEG
PDZK1	Not DEG
NBPF20	Not DEG
OTUD7B	Not DEG
NBPF9	Not DEG
NBPF10	Not DEG
TPM3	Not DEG
GBAP1	Not DEG
SMG5	Not DEG
PBX1	Not DEG
DNM3	Not DEG
TNFSF18	Not DEG
SOAT1	Not DEG
ACBD6	Not DEG
SMG7	Not DEG
RASAL2	Not DEG
BRINP2	Not DEG
PTGS2	Not DEG
ZBTB41	Not DEG
NEK7	Not DEG
SRGAP2C	Not DEG
SRGAP2	Not DEG
PPP1R12B	Not DEG
SRGAP2B	Not DEG
HHAT	Not DEG
ESRRG	Not DEG
BATF3	Not DEG
USH2A	Not DEG
EPRS	Not DEG
DNAH14	Not DEG
NUP133	Not DEG
TRIM11	Not DEG
RGS7	Not DEG
MTR	Not DEG
LYST	Not DEG
ZNF496	Not DEG
SMYD3	Not DEG
NADK	Not DEG
CDK11B	Not DEG
FAM132A	Not DEG
AURKAIP1	Not DEG
TNFRSF14	Not DEG
SKI	Not DEG
TTC34	Not DEG
DFFB	Not DEG
MEGF6	Not DEG
NPHP4	Not DEG
KCNAB2	Not DEG
PLEKHG5	Not DEG
ACOT7	Not DEG
PER3	Not DEG
RERE	Not DEG
H6PD	Not DEG
GPR157	Not DEG
CLSTN1	Not DEG
UBE4B	Not DEG
CTNNBIP1	Not DEG
KIF1B	Not DEG
MTOR	Not DEG
PEX14	Not DEG
EXOSC10	Not DEG
AGTRAP	Not DEG
VPS13D	Not DEG
MFN2	Not DEG
TNFRSF8	Not DEG
FHAD1	Not DEG
KAZN	Not DEG
DNAJC16	Not DEG
FBXO42	Not DEG
SPEN	Not DEG
MFAP2	Not DEG
NBPF1	Not DEG
PADI2	Not DEG
ESPNP	Not DEG
PADI1	Not DEG
ARHGEF10L	Not DEG
ACTL8	Not DEG
PAX7	Not DEG
IFFO2	Not DEG
UBR4	Not DEG
CAPZB	Not DEG
TMCO4	Not DEG
EIF4G3	Not DEG
ALPL	Not DEG
HP1BP3	Not DEG
ECE1	Not DEG
CDC42	Not DEG
ZBTB40	Not DEG
HSPG2	Not DEG
LDLRAD2	Not DEG
LUZP1	Not DEG
E2F2	Not DEG
TCEA3	Not DEG
NIPAL3	Not DEG
RHCE	Not DEG
TMEM57	Not DEG
RPS6KA1	Not DEG
SH3BGRL3	Not DEG
WASF2	Not DEG
TMEM222	Not DEG
AHDC1	Not DEG
PHACTR4	Not DEG
TAF12	Not DEG
SNHG3	Not DEG
RCC1	Not DEG
PTPRU	Not DEG
SRSF4	Not DEG
MATN1	Not DEG
MATN1-AS1	Not DEG
PTP4A2	Not DEG
S100PBP	Not DEG
SYNC	Not DEG
ZBTB8A	Not DEG
KPNA6	Not DEG
HDAC1	Not DEG
RNF19B	Not DEG
PHC2	Not DEG
ZSCAN20	Not DEG
DLGAP3	Not DEG
ZMYM4	Not DEG
AGO3	Not DEG
COL8A2	Not DEG
KIAA0319L	Not DEG
AGO4	Not DEG
TFAP2E	Not DEG
STK40	Not DEG
YRDC	Not DEG
SNIP1	Not DEG
INPP5B	Not DEG
RRAGC	Not DEG
RLF	Not DEG
BMP8B	Not DEG
BMP8A	Not DEG
SCMH1	Not DEG
FOXJ3	Not DEG
HIVEP3	Not DEG
TIE1	Not DEG
SZT2	Not DEG
ST3GAL3	Not DEG
ERI3	Not DEG
IPO13	Not DEG
KDM4A-AS1	Not DEG
EIF2B3	Not DEG
TESK2	Not DEG
ZSWIM5	Not DEG
PIK3R3	Not DEG
POMGNT1	Not DEG
MAST2	Not DEG
MKNK1	Not DEG
CMPK1	Not DEG
SPATA6	Not DEG
TTC39A	Not DEG
OSBPL9	Not DEG
NRD1	Not DEG
EPS15	Not DEG
ZYG11B	Not DEG
ZCCHC11	Not DEG
ZFYVE9	Not DEG
CC2D1B	Not DEG
ZYG11A	Not DEG
LRP8	Not DEG
HSPB11	Not DEG
NDC1	Not DEG
GLIS1	Not DEG
CYB5RL	Not DEG
ACOT11	Not DEG
SSBP3	Not DEG
PRKAA2	Not DEG
PPAP2B	Not DEG
OMA1	Not DEG
KANK4	Not DEG
INADL	Not DEG
ATG4C	Not DEG
DOCK7	Not DEG
ROR1	Not DEG
PGM1	Not DEG
DNAJC6	Not DEG
RAVER2	Not DEG
AK4	Not DEG
JAK1	Not DEG
PDE4B	Not DEG
WDR78	Not DEG
SLC35D1	Not DEG
SERBP1	Not DEG
TCTEX1D1	Not DEG
WLS	Not DEG
GNG12-AS1	Not DEG
GNG12	Not DEG
ANKRD13C	Not DEG
LRRC40	Not DEG
ZRANB2-AS2	Not DEG
FPGT-TNNI3K	Not DEG
LRRIQ3	Not DEG
MSH4	Not DEG
SLC44A5	Not DEG
ST6GALNAC5	Not DEG
NEXN	Not DEG
AK5	Not DEG
ZZZ3	Not DEG
FAM73A	Not DEG
GIPC2	Not DEG
ELTD1	Not DEG
LPHN2	Not DEG
SAMD13	Not DEG
TTLL7	Not DEG
PRKACB	Not DEG
C1ORF52	Not DEG
WDR63	Not DEG
CLCA2	Not DEG
COL24A1	Not DEG
HS2ST1	Not DEG
LRRC8B	Not DEG
PKN2	Not DEG
GBP1	Not DEG
LRRC8D	Not DEG
HFM1	Not DEG
EVI5	Not DEG
RPAP2	Not DEG
FNBP1L	Not DEG
MTF2	Not DEG
BCAR3	Not DEG
CCDC18	Not DEG
SLC44A3	Not DEG
ABCD3	Not DEG
ABCA4	Not DEG
LINC01057	Not DEG
PTBP2	Not DEG
DPYD	Not DEG
SNX7	Not DEG
PALMD	Not DEG
HIAT1	Not DEG
VCAM1	Not DEG
CDC14A	Not DEG
COL11A1	Not DEG
RNPC3	Not DEG
VAV3	Not DEG
WDR47	Not DEG
GPSM2	Not DEG
KIAA1324	Not DEG
STXBP3	Not DEG
RBM15	Not DEG
KCNC4	Not DEG
DRAM2	Not DEG
ST7L	Not DEG
KCND3	Not DEG
CTTNBP2NL	Not DEG
LRIG2	Not DEG
MAGI3	Not DEG
TRIM33	Not DEG
DENND2C	Not DEG
SYT6	Not DEG
AP4B1-AS1	Not DEG
BCL2L15	Not DEG
NGF	Not DEG
IGSF3	Not DEG
SLC22A15	Not DEG
ATP1A1	Not DEG
CD101	Not DEG
MAN1A2	Not DEG
SPAG17	Not DEG
WARS2	Not DEG
FAM72B	Not DEG
LINC00623	Not DEG
PDE4DIP	Not DEG
NOTCH2NL	Not DEG
RNF115	Not DEG
SEC22B	Not DEG
LIX1L	Not DEG
NBPF12	Not DEG
FMO5	Not DEG
NBPF11	Not DEG
GPR89B	Not DEG
BCL9	Not DEG
PPIAL4B	Not DEG
ENSA	Not DEG
TARS2	Not DEG
VPS45	Not DEG
RPRD2	Not DEG
CTSS	Not DEG
TUFT1	Not DEG
ZNF687	Not DEG
POGZ	Not DEG
SNX27	Not DEG
FLG-AS1	Not DEG
CHTOP	Not DEG
NUP210L	Not DEG
GATAD2B	Not DEG
PBXIP1	Not DEG
IL6R	Not DEG
EFNA3	Not DEG
LMNA	Not DEG
MSTO1	Not DEG
MSTO2P	Not DEG
ASH1L	Not DEG
SYT11	Not DEG
IQGAP3	Not DEG
PRCC	Not DEG
IFI16	Not DEG
COPA	Not DEG
IGSF9	Not DEG
CASQ1	Not DEG
PFDN2	Not DEG
NOS1AP	Not DEG
ATF6	Not DEG
RGS5	Not DEG
DDR2	Not DEG
UCK2	Not DEG
FAM78B	Not DEG
MAEL	Not DEG
POU2F1	Not DEG
RCSD1	Not DEG
DCAF6	Not DEG
MPC2	Not DEG
TIPRL	Not DEG
DPT	Not DEG
BLZF1	Not DEG
NME7	Not DEG
ATP1B1	Not DEG
PRRX1	Not DEG
KIFAP3	Not DEG
VAMP4	Not DEG
FMO4	Not DEG
DARS2	Not DEG
RC3H1	Not DEG
RABGAP1L	Not DEG
CACYBP	Not DEG
PAPPA2	Not DEG
ABL2	Not DEG
FAM20B	Not DEG
RALGPS2	Not DEG
AXDND1	Not DEG
LHX4	Not DEG
TOR1AIP2	Not DEG
CEP350	Not DEG
MR1	Not DEG
XPR1	Not DEG
CACNA1E	Not DEG
LAMC1	Not DEG
DHX9	Not DEG
NMNAT2	Not DEG
RGL1	Not DEG
TSEN15	Not DEG
EDEM3	Not DEG
FAM129A	Not DEG
SWT1	Not DEG
C1ORF27	Not DEG
HMCN1	Not DEG
PLA2G4A	Not DEG
CDC73	Not DEG
LINC01031	Not DEG
GLRX2	Not DEG
KCNT2	Not DEG
DENND1B	Not DEG
CRB1	Not DEG
PTPRC	Not DEG
MIR181A1HG	Not DEG
IGFN1	Not DEG
CAMSAP2	Not DEG
IPO9-AS1	Not DEG
CSRP1	Not DEG
ELF3	Not DEG
NAV1	Not DEG
LGR6	Not DEG
ARL8A	Not DEG
IPO9	Not DEG
PPFIA4	Not DEG
SYT2	Not DEG
KDM5B	Not DEG
PLEKHA6	Not DEG
SOX13	Not DEG
ZC3H11A	Not DEG
ATP2B4	Not DEG
DSTYK	Not DEG
NFASC	Not DEG
LRRN2	Not DEG
FAIM3	Not DEG
YOD1	Not DEG
RASSF5	Not DEG
PLXNA2	Not DEG
SYT14	Not DEG
IRF6	Not DEG
KCNH1	Not DEG
INTS7	Not DEG
LPGAT1	Not DEG
PPP2R5A	Not DEG
RPS6KC1	Not DEG
PROX1	Not DEG
CENPF	Not DEG
PTPN14	Not DEG
PROX1-AS1	Not DEG
KCTD3	Not DEG
KCNK2	Not DEG
GPATCH2	Not DEG
SPATA17	Not DEG
RRP15	Not DEG
RAB3GAP2	Not DEG
MARC1	Not DEG
MARK1	Not DEG
DUSP10	Not DEG
DISP1	Not DEG
MIA3	Not DEG
TP53BP2	Not DEG
SUSD4	Not DEG
CNIH3	Not DEG
ENAH	Not DEG
SRP9	Not DEG
ACBD3	Not DEG
CDC42BPA	Not DEG
ADCK3	Not DEG
ITPKB	Not DEG
OBSCN	Not DEG
ZNF678	Not DEG
SNAP47	Not DEG
RHOU	Not DEG
GALNT2	Not DEG
URB2	Not DEG
PGBD5	Not DEG
TTC13	Not DEG
COG2	Not DEG
EXOC8	Not DEG
DISC1	Not DEG
PCNXL2	Not DEG
SLC35F3	Not DEG
GNG4	Not DEG
TBCE	Not DEG
B3GALNT2	Not DEG
ARID4B	Not DEG
TOMM20	Not DEG
GPR137B	Not DEG
NID1	Not DEG
HEATR1	Not DEG
LGALS8	Not DEG
FMN2	Not DEG
KMO	Not DEG
WDR64	Not DEG
PLD5	Not DEG
CEP170	Not DEG
AKT3	Not DEG
SDCCAG8	Not DEG
DESI2	Not DEG
EFCAB2	Not DEG
C1ORF101	Not DEG
ADSS	Not DEG
ZNF124	Not DEG
CNST	Not DEG
AHCTF1	Not DEG
ZNF670	Not DEG
WASH7P	Not DEG
MIR1302-2	Not DEG
FAM87B	Not DEG
LINC00115	Not DEG
KLHL17	Not DEG
NOC2L	Not DEG
PLEKHN1	Not DEG
ISG15	Not DEG
AGRN	Not DEG
TNFRSF4	Not DEG
B3GALT6	Not DEG
SDF4	Not DEG
DVL1	Not DEG
TAS1R3	Not DEG
CPSF3L	Not DEG
UBE2J2	Not DEG
MXRA8	Not DEG
PUSL1	Not DEG
SCNN1D	Not DEG
ACAP3	Not DEG
ANKRD65	Not DEG
VWA1	Not DEG
ATAD3C	Not DEG
MRPL20	Not DEG
CCNL2	Not DEG
ATAD3B	Not DEG
MIB2	Not DEG
ATAD3A	Not DEG
TMEM240	Not DEG
SSU72	Not DEG
C1ORF233	Not DEG
SLC35E2	Not DEG
CDK11A	Not DEG
SLC35E2B	Not DEG
GNB1	Not DEG
TMEM52	Not DEG
CALML6	Not DEG
C1ORF86	Not DEG
RER1	Not DEG
PEX10	Not DEG
MORN1	Not DEG
PLCH2	Not DEG
PANK4	Not DEG
HES5	Not DEG
FAM213B	Not DEG
MMEL1	Not DEG
LINC00982	Not DEG
ARHGEF16	Not DEG
TP73	Not DEG
TP73-AS1	Not DEG
WRAP73	Not DEG
TPRG1L	Not DEG
LRRC47	Not DEG
CEP104	Not DEG
C1ORF174	Not DEG
RPL22	Not DEG
CHD5	Not DEG
RNF207	Not DEG
GPR153	Not DEG
LINC00337	Not DEG
ESPN	Not DEG
HES2	Not DEG
NOL9	Not DEG
TAS1R1	Not DEG
KLHL21	Not DEG
ZBTB48	Not DEG
PHF13	Not DEG
DNAJC11	Not DEG
THAP3	Not DEG
VAMP3	Not DEG
PARK7	Not DEG
ERRFI1	Not DEG
ENO1	Not DEG
ENO1-AS1	Not DEG
SLC2A5	Not DEG
MIR34A	Not DEG
SPSB1	Not DEG
TMEM201	Not DEG
SLC25A33	Not DEG
PIK3CD	Not DEG
RBP7	Not DEG
LZIC	Not DEG
NMNAT1	Not DEG
PGD	Not DEG
RNU6-2	Not DEG
APITD1	Not DEG
DFFA	Not DEG
CORT	Not DEG
TARDBP	Not DEG
SRM	Not DEG
MASP2	Not DEG
MTOR-AS1	Not DEG
UBIAD1	Not DEG
PTCHD2	Not DEG
FBXO6	Not DEG
FBXO44	Not DEG
MAD2L2	Not DEG
FBXO2	Not DEG
DRAXIN	Not DEG
CLCN6	Not DEG
NPPA-AS1	Not DEG
MTHFR	Not DEG
PLOD1	Not DEG
KIAA2013	Not DEG
MIIP	Not DEG
TNFRSF1B	Not DEG
SNORA59A	Not DEG
DHRS3	Not DEG
PDPN	Not DEG
PRDM2	Not DEG
TMEM51	Not DEG
CASP9	Not DEG
EFHD2	Not DEG
DDI2	Not DEG
AGMAT	Not DEG
SLC25A34	Not DEG
PLEKHM2	Not DEG
FBLIM1	Not DEG
ZBTB17	Not DEG
CLCNKB	Not DEG
CLCNKA	Not DEG
HSPB7	Not DEG
EPHA2	Not DEG
FAM131C	Not DEG
RSG1	Not DEG
ARHGEF19	Not DEG
SZRD1	Not DEG
CROCCP3	Not DEG
MST1P2	Not DEG
CROCCP2	Not DEG
MST1L	Not DEG
CROCC	Not DEG
ATP13A2	Not DEG
SDHB	Not DEG
RCC2	Not DEG
ALDH4A1	Not DEG
AKR7A2	Not DEG
MRTO4	Not DEG
PQLC2	Not DEG
AKR7A3	Not DEG
AKR7L	Not DEG
EMC1	Not DEG
MINOS1	Not DEG
NBL1	Not DEG
RPS14P3	Not DEG
OTUD3	Not DEG
MUL1	Not DEG
CAMK2N1	Not DEG
CDA	Not DEG
FAM43B	Not DEG
DDOST	Not DEG
KIF17	Not DEG
SH2D5	Not DEG
NBPF3	Not DEG
RAP1GAP	Not DEG
LINC00339	Not DEG
WNT4	Not DEG
KDM1A	Not DEG
ZNF436	Not DEG
HNRNPR	Not DEG
ASAP3	Not DEG
MDS2	Not DEG
ID3	Not DEG
RPL11	Not DEG
TCEB3	Not DEG
PITHD1	Not DEG
LYPLA2	Not DEG
GALE	Not DEG
FUCA1	Not DEG
HMGCL	Not DEG
PNRC2	Not DEG
SRSF10	Not DEG
STPG1	Not DEG
RCAN3	Not DEG
SRRM1	Not DEG
RUNX3	Not DEG
SYF2	Not DEG
RHD	Not DEG
TMEM50A	Not DEG
LDLRAP1	Not DEG
PAQR7	Not DEG
SEPN1	Not DEG
AUNIP	Not DEG
MTFR1L	Not DEG
PAFAH2	Not DEG
EXTL1	Not DEG
PDIK1L	Not DEG
CNKSR1	Not DEG
ZNF593	Not DEG
CEP85	Not DEG
UBXN11	Not DEG
DHDDS	Not DEG
HMGN2	Not DEG
PIGV	Not DEG
ARID1A	Not DEG
SFN	Not DEG
GPN2	Not DEG
ZDHHC18	Not DEG
GPATCH3	Not DEG
FAM46B	Not DEG
TRNP1	Not DEG
SLC9A1	Not DEG
WDTC1	Not DEG
SYTL1	Not DEG
FCN3	Not DEG
GPR3	Not DEG
MAP3K6	Not DEG
IFI6	Not DEG
FAM76A	Not DEG
STX12	Not DEG
PPP1R8	Not DEG
THEMIS2	Not DEG
RPA2	Not DEG
XKR8	Not DEG
ATPIF1	Not DEG
PTAFR	Not DEG
DNAJC8	Not DEG
SESN2	Not DEG
MED18	Not DEG
SNORA73B	Not DEG
TRNAU1AP	Not DEG
RAB42	Not DEG
SNORD99	Not DEG
SNHG12	Not DEG
YTHDF2	Not DEG
GMEB1	Not DEG
RNU11	Not DEG
OPRD1	Not DEG
TMEM200B	Not DEG
MECR	Not DEG
LAPTM5	Not DEG
SDC3	Not DEG
SNORD103B	Not DEG
NKAIN1	Not DEG
ZCCHC17	Not DEG
SNRNP40	Not DEG
SERINC2	Not DEG
TINAGL1	Not DEG
PEF1	Not DEG
BAI2	Not DEG
COL16A1	Not DEG
SPOCD1	Not DEG
TMEM39B	Not DEG
IQCC	Not DEG
DCDC2B	Not DEG
TXLNA	Not DEG
MTMR9LP	Not DEG
CCDC28B	Not DEG
TMEM234	Not DEG
EIF3I	Not DEG
FAM229A	Not DEG
TSSK3	Not DEG
MARCKSL1	Not DEG
BSDC1	Not DEG
ZBTB8B	Not DEG
ZBTB8OS	Not DEG
RBBP4	Not DEG
KIAA1522	Not DEG
YARS	Not DEG
TMEM54	Not DEG
AK2	Not DEG
TRIM62	Not DEG
ZNF362	Not DEG
A3GALT2	Not DEG
SMIM12	Not DEG
ZMYM6NB	Not DEG
ZMYM1	Not DEG
NCDN	Not DEG
PSMB2	Not DEG
C1ORF216	Not DEG
AGO1	Not DEG
ADPRHL2	Not DEG
TRAPPC3	Not DEG
MAP7D1	Not DEG
SH3D21	Not DEG
EVA1B	Not DEG
OSCP1	Not DEG
LSM10	Not DEG
MRPS15	Not DEG
ZC3H12A	Not DEG
MEAF6	Not DEG
MIR5581	Not DEG
GNL2	Not DEG
RSPO1	Not DEG
DNALI1	Not DEG
C1ORF109	Not DEG
EPHA10	Not DEG
MANEAL	Not DEG
MTF1	Not DEG
C1ORF122	Not DEG
FHL3	Not DEG
SF3A3	Not DEG
UTP11L	Not DEG
RHBDL2	Not DEG
MYCBP	Not DEG
NDUFS5	Not DEG
AKIRIN1	Not DEG
KIAA0754	Not DEG
HEYL	Not DEG
PABPC4	Not DEG
PPIEL	Not DEG
SNORA55	Not DEG
HPCAL4	Not DEG
PPIE	Not DEG
OXCT2	Not DEG
TRIT1	Not DEG
MFSD2A	Not DEG
PPT1	Not DEG
CAP1	Not DEG
ZMPSTE24	Not DEG
TMCO2	Not DEG
SMAP2	Not DEG
COL9A2	Not DEG
EXO5	Not DEG
ZFP69	Not DEG
ZNF684	Not DEG
ZFP69B	Not DEG
RIMS3	Not DEG
NFYC	Not DEG
CITED4	Not DEG
CTPS1	Not DEG
SLFNL1	Not DEG
EDN2	Not DEG
ZMYND12	Not DEG
PPCS	Not DEG
CCDC30	Not DEG
YBX1	Not DEG
PPIH	Not DEG
C1ORF50	Not DEG
ZNF691	Not DEG
CCDC23	Not DEG
ERMAP	Not DEG
SLC2A1-AS1	Not DEG
SLC2A1	Not DEG
EBNA1BP2	Not DEG
ELOVL1	Not DEG
MED8	Not DEG
HYI	Not DEG
KDM4A	Not DEG
ARTN	Not DEG
SLC6A9	Not DEG
B4GALT2	Not DEG
ATP6V0B	Not DEG
DPH2	Not DEG
CCDC24	Not DEG
DMAP1	Not DEG
C1ORF228	Not DEG
TMEM53	Not DEG
PTCH2	Not DEG
RPS8	Not DEG
SNORD38A	Not DEG
BEST4	Not DEG
SNORD46	Not DEG
BTBD19	Not DEG
PLK3	Not DEG
TCTEX1D4	Not DEG
UROD	Not DEG
HECTD3	Not DEG
MUTYH	Not DEG
HPDL	Not DEG
TOE1	Not DEG
PRDX1	Not DEG
MMACHC	Not DEG
CCDC163P	Not DEG
AKR1A1	Not DEG
RPS15AP10	Not DEG
CCDC17	Not DEG
NASP	Not DEG
IPP	Not DEG
TMEM69	Not DEG
TSPAN1	Not DEG
RAD54L	Not DEG
LRRC41	Not DEG
UQCRH	Not DEG
LURAP1	Not DEG
NSUN4	Not DEG
FAAH	Not DEG
MKNK1-AS1	Not DEG
MOB3C	Not DEG
EFCAB14	Not DEG
ATPAF1	Not DEG
EFCAB14-AS1	Not DEG
PDZK1IP1	Not DEG
LINC00853	Not DEG
CYP4A22	Not DEG
STIL	Not DEG
FOXE3	Not DEG
FOXD2	Not DEG
FOXD2-AS1	Not DEG
SLC5A9	Not DEG
BEND5	Not DEG
CDKN2C	Not DEG
RNF11	Not DEG
BTF3L4	Not DEG
TXNDC12	Not DEG
KTI12	Not DEG
PRPF38A	Not DEG
GPX7	Not DEG
FAM159A	Not DEG
ECHDC2	Not DEG
C1ORF123	Not DEG
MAGOH	Not DEG
CPT2	Not DEG
YIPF1	Not DEG
LRRC42	Not DEG
TMEM59	Not DEG
MRPL37	Not DEG
SSBP3-AS1	Not DEG
FAM151A	Not DEG
TTC4	Not DEG
PARS2	Not DEG
DHCR24	Not DEG
MYSM1	Not DEG
JUN	Not DEG
CYP2J2	Not DEG
TM2D1	Not DEG
ALG6	Not DEG
DLEU2L	Not DEG
EFCAB7	Not DEG
LEPROT	Not DEG
MIER1	Not DEG
IL12RB2	Not DEG
GADD45A	Not DEG
DIRAS3	Not DEG
SRSF11	Not DEG
CTH	Not DEG
HHLA3	Not DEG
ZRANB2	Not DEG
ZRANB2-AS1	Not DEG
MIR186	Not DEG
FPGT	Not DEG
TYW3	Not DEG
CRYZ	Not DEG
ACADM	Not DEG
RABGGTB	Not DEG
USP33	Not DEG
NEXN-AS1	Not DEG
FUBP1	Not DEG
DNAJB4	Not DEG
PTGFR	Not DEG
IFI44	Not DEG
IFI44L	Not DEG
GNG5	Not DEG
CTBS	Not DEG
RPF1	Not DEG
SSX2IP	Not DEG
MCOLN3	Not DEG
SYDE2	Not DEG
BCL10	Not DEG
CYR61	Not DEG
ZNHIT6	Not DEG
ODF2L	Not DEG
SH3GLB1	Not DEG
2020-09-15	Not DEG
LMO4	Not DEG
GTF2B	Not DEG
CCBL2	Not DEG
GBP3	Not DEG
RBMXL1	Not DEG
GBP2	Not DEG
GBP1P1	Not DEG
GEMIN8P4	Not DEG
ZNF326	Not DEG
ZNF644	Not DEG
CDC7	Not DEG
BTBD8	Not DEG
KIAA1107	Not DEG
GLMN	Not DEG
C1ORF146	Not DEG
GFI1	Not DEG
RPL5	Not DEG
SNORA66	Not DEG
TMED5	Not DEG
DR1	Not DEG
DNTTIP2	Not DEG
ARHGAP29	Not DEG
F3	Not DEG
CNN3	Not DEG
ALG14	Not DEG
TMEM56	Not DEG
RWDD3	Not DEG
MIR137HG	Not DEG
FRRS1	Not DEG
AGL	Not DEG
SLC35A3	Not DEG
SASS6	Not DEG
LRRC39	Not DEG
TRMT13	Not DEG
RTCA	Not DEG
MIR553	Not DEG
GPR88	Not DEG
SLC30A7	Not DEG
EXTL2	Not DEG
DPH5	Not DEG
S1PR1	Not DEG
AMY2B	Not DEG
PRMT6	Not DEG
SLC25A24	Not DEG
FAM102B	Not DEG
HENMT1	Not DEG
PRPF38B	Not DEG
AKNAD1	Not DEG
CLCC1	Not DEG
TMEM167B	Not DEG
TAF13	Not DEG
SCARNA2	Not DEG
SARS	Not DEG
CELSR2	Not DEG
PSRC1	Not DEG
SORT1	Not DEG
PSMA5	Not DEG
AMIGO1	Not DEG
CYB561D1	Not DEG
GPR61	Not DEG
ATXN7L2	Not DEG
AMPD2	Not DEG
GSTM2	Not DEG
GSTM4	Not DEG
GNAT2	Not DEG
GSTM3	Not DEG
CSF1	Not DEG
STRIP1	Not DEG
AHCYL1	Not DEG
SLC6A17	Not DEG
SLC16A4	Not DEG
LAMTOR5	Not DEG
LAMTOR5-AS1	Not DEG
LRIF1	Not DEG
DENND2D	Not DEG
CEPT1	Not DEG
CHI3L2	Not DEG
OVGP1	Not DEG
WDR77	Not DEG
ATP5F1	Not DEG
C1ORF162	Not DEG
FAM212B	Not DEG
DDX20	Not DEG
MOV10	Not DEG
CAPZA1	Not DEG
FAM19A3	Not DEG
PPM1J	Not DEG
SLC16A1	Not DEG
RSBN1	Not DEG
HIPK1	Not DEG
DCLRE1B	Not DEG
OLFML3	Not DEG
AP4B1	Not DEG
BCAS2	Not DEG
CSDE1	Not DEG
NRAS	Not DEG
SIKE1	Not DEG
VANGL1	Not DEG
NHLH2	Not DEG
MAB21L3	Not DEG
CD58	Not DEG
PTGFRN	Not DEG
TRIM45	Not DEG
TTF2	Not DEG
GDAP2	Not DEG
TBX15	Not DEG
ZNF697	Not DEG
PHGDH	Not DEG
NBPF7	Not DEG
HIST2H2BA	Not DEG
EMBP1	Not DEG
PPIAL4G	Not DEG
FAM72C	Not DEG
TXNIP	Not DEG
POLR3GL	Not DEG
ANKRD34A	Not DEG
ITGA10	Not DEG
PEX11B	Not DEG
PIAS3	Not DEG
ANKRD35	Not DEG
POLR3C	Not DEG
GNRHR2	Not DEG
RBM8A	Not DEG
NUDT17	Not DEG
CD160	Not DEG
GPR89A	Not DEG
NBPF13P	Not DEG
PRKAB2	Not DEG
CHD1L	Not DEG
ACP6	Not DEG
RNVU1-19	Not DEG
NBPF14	Not DEG
NBPF15	Not DEG
RNVU1-20	Not DEG
HIST2H3D	Not DEG
HIST2H2BF	Not DEG
FCGR1A	Not DEG
HIST2H2AA4	Not DEG
SF3B4	Not DEG
MTMR11	Not DEG
BOLA1	Not DEG
HIST2H2BE	Not DEG
HIST2H2AC	Not DEG
SV2A	Not DEG
HIST2H2BC	Not DEG
ANP32E	Not DEG
PLEKHO1	Not DEG
APH1A	Not DEG
MRPS21	Not DEG
C1ORF54	Not DEG
PRPF3	Not DEG
CA14	Not DEG
MCL1	Not DEG
ADAMTSL4	Not DEG
ECM1	Not DEG
HORMAD1	Not DEG
GOLPH3L	Not DEG
ARNT	Not DEG
CTSK	Not DEG
FAM63A	Not DEG
ANXA9	Not DEG
SETDB1	Not DEG
CERS2	Not DEG
C1ORF56	Not DEG
MLLT11	Not DEG
SEMA6C	Not DEG
GABPB2	Not DEG
CDC42SE1	Not DEG
VPS72	Not DEG
SCNM1	Not DEG
PIP5K1A	Not DEG
PSMD4	Not DEG
LYSMD1	Not DEG
RFX5	Not DEG
PSMB4	Not DEG
PI4KB	Not DEG
SELENBP1	Not DEG
CGN	Not DEG
OAZ3	Not DEG
TDRKH	Not DEG
MRPL9	Not DEG
THEM5	Not DEG
THEM4	Not DEG
C2CD4D	Not DEG
S100A10	Not DEG
S100A11	Not DEG
NBPF18P	Not DEG
TCHH	Not DEG
FLG	Not DEG
HRNR	Not DEG
FLG2	Not DEG
LCE3D	Not DEG
LCE3A	Not DEG
KPRP	Not DEG
S100A2	Not DEG
S100A1	Not DEG
S100A4	Not DEG
S100A5	Not DEG
S100A6	Not DEG
S100A13	Not DEG
S100A16	Not DEG
S100A14	Not DEG
S100A3	Not DEG
ILF2	Not DEG
SNAPIN	Not DEG
INTS3	Not DEG
SLC27A3	Not DEG
SLC39A1	Not DEG
CREB3L4	Not DEG
RPS27	Not DEG
RAB13	Not DEG
DENND4B	Not DEG
CRTC2	Not DEG
JTB	Not DEG
HAX1	Not DEG
C1ORF43	Not DEG
UBAP2L	Not DEG
C1ORF189	Not DEG
ATP8B2	Not DEG
UBE2Q1	Not DEG
UBE2Q1-AS1	Not DEG
SHE	Not DEG
ADAR	Not DEG
CHRNB2	Not DEG
PMVK	Not DEG
ADAM15	Not DEG
FLAD1	Not DEG
DCST1	Not DEG
SHC1	Not DEG
DCST2	Not DEG
EFNA4	Not DEG
ZBTB7B	Not DEG
PYGO2	Not DEG
CKS1B	Not DEG
MIR4258	Not DEG
DPM3	Not DEG
MUC1	Not DEG
TRIM46	Not DEG
THBS3	Not DEG
SLC50A1	Not DEG
MTX1	Not DEG
KRTCAP2	Not DEG
EFNA1	Not DEG
RUSC1	Not DEG
FAM189B	Not DEG
GBA	Not DEG
FDPS	Not DEG
HCN3	Not DEG
SCAMP3	Not DEG
CLK2	Not DEG
RUSC1-AS1	Not DEG
ASH1L-AS1	Not DEG
YY1AP1	Not DEG
DAP3	Not DEG
GON4L	Not DEG
RIT1	Not DEG
ARHGEF2	Not DEG
KIAA0907	Not DEG
MEX3A	Not DEG
LAMTOR2	Not DEG
RAB25	Not DEG
SSR2	Not DEG
UBQLN4	Not DEG
PMF1	Not DEG
SEMA4A	Not DEG
PAQR6	Not DEG
SLC25A44	Not DEG
TMEM79	Not DEG
TSACC	Not DEG
CCT3	Not DEG
MEF2D	Not DEG
BCAN	Not DEG
GPATCH4	Not DEG
APOA1BP	Not DEG
HAPLN2	Not DEG
TTC24	Not DEG
RRNAD1	Not DEG
HDGF	Not DEG
ISG20L2	Not DEG
MRPL24	Not DEG
NES	Not DEG
SH2D2A	Not DEG
PEAR1	Not DEG
NTRK1	Not DEG
ARHGEF11	Not DEG
MIR765	Not DEG
ETV3	Not DEG
KIRREL	Not DEG
AIM2	Not DEG
CADM3	Not DEG
DUSP23	Not DEG
C1ORF204	Not DEG
TAGLN2	Not DEG
SLAMF8	Not DEG
VSIG8	Not DEG
SLAMF9	Not DEG
PIGM	Not DEG
IGSF8	Not DEG
PEX19	Not DEG
PEA15	Not DEG
DCAF8	Not DEG
SUMO1P3	Not DEG
NHLH1	Not DEG
NCSTN	Not DEG
VANGL2	Not DEG
F11R	Not DEG
ARHGAP30	Not DEG
USF1	Not DEG
KLHDC9	Not DEG
PVRL4	Not DEG
TSTD1	Not DEG
NR1I3	Not DEG
B4GALT3	Not DEG
USP21	Not DEG
ADAMTS4	Not DEG
NDUFS2	Not DEG
NIT1	Not DEG
DEDD	Not DEG
PPOX	Not DEG
TOMM40L	Not DEG
FCER1G	Not DEG
UFC1	Not DEG
MPZ	Not DEG
SDHC	Not DEG
FCRLA	Not DEG
FCRLB	Not DEG
DUSP12	Not DEG
C1ORF226	Not DEG
SH2D1B	Not DEG
C1ORF111	Not DEG
UHMK1	Not DEG
UAP1	Not DEG
HSD17B7	Not DEG
C1ORF110	Not DEG
RGS4	Not DEG
ALDH9A1	Not DEG
MGST3	Not DEG
TMCO1	Not DEG
POGK	Not DEG
TADA1	Not DEG
ILDR2	Not DEG
DUSP27	Not DEG
CD247	Not DEG
CREG1	Not DEG
MPZL1	Not DEG
ADCY10	Not DEG
GPR161	Not DEG
SFT2D2	Not DEG
TBX19	Not DEG
LINC00626	Not DEG
SLC19A2	Not DEG
CCDC181	Not DEG
METTL18	Not DEG
SCYL3	Not DEG
C1ORF112	Not DEG
GORAB	Not DEG
PRRC2C	Not DEG
METTL13	Not DEG
DNM3OS	Not DEG
MIR214	Not DEG
MIR199A2	Not DEG
C1ORF105	Not DEG
PIGC	Not DEG
SUCO	Not DEG
TNFSF4	Not DEG
PRDX6	Not DEG
ANKRD45	Not DEG
KLHL20	Not DEG
CENPL	Not DEG
SNORD78	Not DEG
ZBTB37	Not DEG
SERPINC1	Not DEG
GAS5-AS1	Not DEG
GAS5	Not DEG
MRPS14	Not DEG
KIAA0040	Not DEG
SEC16B	Not DEG
RASAL2-AS1	Not DEG
C1ORF220	Not DEG
ANGPTL1	Not DEG
TOR3A	Not DEG
TOR1AIP1	Not DEG
QSOX1	Not DEG
KIAA1614	Not DEG
STX6	Not DEG
IER5	Not DEG
GLUL	Not DEG
RGS16	Not DEG
RNASEL	Not DEG
NPL	Not DEG
LAMC2	Not DEG
SMG7-AS1	Not DEG
NCF2	Not DEG
ARPC5	Not DEG
COLGALT2	Not DEG
RNF2	Not DEG
TRMT1L	Not DEG
IVNS1ABP	Not DEG
TPR	Not DEG
OCLM	Not DEG
PRG4	Not DEG
RGS2	Not DEG
MIR4426	Not DEG
UCHL5	Not DEG
TROVE2	Not DEG
B3GALT2	Not DEG
CFH	Not DEG
CFHR1	Not DEG
C1ORF53	Not DEG
MIR181B1	Not DEG
ZNF281	Not DEG
LINC00862	Not DEG
DDX59	Not DEG
C1ORF106	Not DEG
KIF21B	Not DEG
TMEM9	Not DEG
ASCL5	Not DEG
PKP1	Not DEG
TNNT2	Not DEG
PHLDA3	Not DEG
RPS10P7	Not DEG
RNPEP	Not DEG
SHISA4	Not DEG
TIMM17A	Not DEG
PTPN7	Not DEG
UBE2T	Not DEG
KLHL12	Not DEG
RABIF	Not DEG
PCAT6	Not DEG
CYB5R1	Not DEG
TMEM183A	Not DEG
ADIPOR1	Not DEG
CHI3L1	Not DEG
ADORA1	Not DEG
MYBPH	Not DEG
CHIT1	Not DEG
BTG2	Not DEG
FMOD	Not DEG
PRELP	Not DEG
LAX1	Not DEG
ZBED6	Not DEG
SNRPE	Not DEG
ETNK2	Not DEG
REN	Not DEG
KISS1	Not DEG
GOLT1A	Not DEG
PPP1R15B	Not DEG
MDM4	Not DEG
RBBP5	Not DEG
TMEM81	Not DEG
CNTN2	Not DEG
NUAK2	Not DEG
ELK4	Not DEG
SLC45A3	Not DEG
MFSD4	Not DEG
NUCKS1	Not DEG
SLC41A1	Not DEG
FAM72A	Not DEG
IKBKE	Not DEG
EIF2D	Not DEG
DYRK3	Not DEG
MAPKAPK2	Not DEG
IL24	Not DEG
C1ORF116	Not DEG
PFKFB2	Not DEG
CD55	Not DEG
CD46	Not DEG
CD34	Not DEG
LAMB3	Not DEG
TRAF3IP3	Not DEG
C1ORF74	Not DEG
G0S2	Not DEG
DIEXF	Not DEG
SERTAD4-AS1	Not DEG
SERTAD4	Not DEG
RCOR3	Not DEG
TRAF5	Not DEG
LINC00467	Not DEG
SLC30A1	Not DEG
DTL	Not DEG
TMEM206	Not DEG
NENF	Not DEG
ATF3	Not DEG
NSL1	Not DEG
TATDN3	Not DEG
FLVCR1	Not DEG
FLVCR1-AS1	Not DEG
ANGEL2	Not DEG
SMYD2	Not DEG
TGFB2	Not DEG
LYPLAL1	Not DEG
BPNT1	Not DEG
IARS2	Not DEG
AURKAPS1	Not DEG
MARC2	Not DEG
C1ORF115	Not DEG
HLX	Not DEG
TAF1A	Not DEG
HHIPL2	Not DEG
BROX	Not DEG
FAM177B	Not DEG
AIDA	Not DEG
CAPN2	Not DEG
DEGS1	Not DEG
FBXO28	Not DEG
NVL	Not DEG
WDR26	Not DEG
CNIH4	Not DEG
LBR	Not DEG
EPHX1	Not DEG
TMEM63A	Not DEG
SDE2	Not DEG
PYCR2	Not DEG
H3F3AP4	Not DEG
H3F3A	Not DEG
MIXL1	Not DEG
PARP1	Not DEG
PSEN2	Not DEG
JMJD4	Not DEG
WNT9A	Not DEG
MRPL55	Not DEG
ARF1	Not DEG
C1ORF35	Not DEG
GUK1	Not DEG
GJC2	Not DEG
C1ORF145	Not DEG
IBA57-AS1	Not DEG
IBA57	Not DEG
HIST3H2A	Not DEG
TRIM17	Not DEG
BTNL10	Not DEG
RNF187	Not DEG
DUSP5P1	Not DEG
CCSAP	Not DEG
RAB4A	Not DEG
ABCB10	Not DEG
TAF5L	Not DEG
CAPN9	Not DEG
C1ORF198	Not DEG
ARV1	Not DEG
FAM89A	Not DEG
GNPAT	Not DEG
C1ORF131	Not DEG
EGLN1	Not DEG
SPRTN	Not DEG
TSNAX	Not DEG
SIPA1L2	Not DEG
MAP10	Not DEG
NTPCR	Not DEG
KCNK1	Not DEG
TARBP1	Not DEG
COA6	Not DEG
IRF2BP2	Not DEG
LINC00184	Not DEG
RBM34	Not DEG
SNORA14B	Not DEG
GGPS1	Not DEG
ERO1LB	Not DEG
LGALS8-AS1	Not DEG
FH	Not DEG
CHML	Not DEG
OPN3	Not DEG
EXO1	Not DEG
MIR4677	Not DEG
ZBTB18	Not DEG
C1ORF100	Not DEG
HNRNPU	Not DEG
HNRNPU-AS1	Not DEG
COX20	Not DEG
TFB2M	Not DEG
SCCPDH	Not DEG
ZNF695	Not DEG
ZNF669	Not DEG
C1ORF229	Not DEG
MIR3916	Not DEG
[truncated: 13,705 more rows]
