# Supplementary material for: Modeling expression ranks for noise-tolerant differential expression analysis of scRNA-seq data
Source: HighWire-hosted journal article supplement (doi:10.1101/gr.267070.120), 2021-03-05
Supplement: Supplemental_Table_S9.xlsx [file Supplemental_Table_S9.xlsx]

## Sheet: Gupta Bulk Dataset (K562 vs. BJ
Supplemental Table S9: Bulk based DEG calls for the Gupta dataset (replicates BJ fibroblast vs. K562).
Gene Symbol	DEG Call
AASS	DEG
ABCC3	DEG
ABI3BP	DEG
ABRACL	DEG
ACAD11	DEG
ACN9	DEG
ACSM3	DEG
ACVR2B	DEG
ACVRL1	DEG
ADAM19	DEG
ADAM9	DEG
ADAMTS3	DEG
ADAMTS6	DEG
ADAMTSL4	DEG
ADCY6	DEG
ADM	DEG
AEBP1	DEG
AGAP1	DEG
AGPAT9	DEG
AHNAK	DEG
AHR	DEG
AIM1	DEG
AK4	DEG
AKAP12	DEG
AKR1B1	DEG
AKR1C2	DEG
ALDH1A1	DEG
ALDH3A2	DEG
ALDH3B1	DEG
ALDH5A1	DEG
ALPK1	DEG
ALS2CR11	DEG
ANK1	DEG
ANKRD20A12P	DEG
ANKRD33B	DEG
ANPEP	DEG
ANTXR1	DEG
ANXA2	DEG
ANXA4	DEG
ANXA5	DEG
ANXA6	DEG
APOBEC3D	DEG
APOC1	DEG
APPL2	DEG
ARHGAP25	DEG
ARHGEF5	DEG
ARID5B	DEG
ARL4A	DEG
ARMC9	DEG
ARMCX5-GPRASP2	DEG
ARNTL2	DEG
ARSD	DEG
ASAP1	DEG
ASPH	DEG
ASS1	DEG
ATP10D	DEG
ATP1B1	DEG
ATP2B4	DEG
ATP5I	DEG
ATP5J2	DEG
ATXN10	DEG
AVPI1	DEG
AXL	DEG
BACE1	DEG
BBS9	DEG
BCL6	DEG
BCL9L	DEG
BHLHE40	DEG
BHMT2	DEG
BLVRB	DEG
BMP1	DEG
BMPR2	DEG
BST2	DEG
BTN3A2	DEG
C10orf54	DEG
C10orf57	DEG
C10orf76	DEG
C11orf70	DEG
C12orf10	DEG
C12orf5	DEG
C12orf73	DEG
C14orf132	DEG
C14orf23	DEG
C15orf52	DEG
C16orf45	DEG
C1QTNF6	DEG
C1S	DEG
C1orf198	DEG
C22orf39	DEG
C2orf42	DEG
C2orf88	DEG
C3	DEG
C3orf70	DEG
C3orf72	DEG
C7orf10	DEG
CAB39L	DEG
CACNB3	DEG
CALCOCO1	DEG
CALHM2	DEG
CAMK2N1	DEG
CAPN2	DEG
CASP10	DEG
CBR1	DEG
CC2D2A	DEG
CCBE1	DEG
CCDC163P	DEG
CCDC58	DEG
CCND1	DEG
CCND2	DEG
CD109	DEG
CD163L1	DEG
CD24	DEG
CD302	DEG
CD33	DEG
CD44	DEG
CD9	DEG
CD99	DEG
CDA	DEG
CDC42EP3	DEG
CDC45	DEG
CDCA7L	DEG
CDKN1A	DEG
CDT1	DEG
CECR1	DEG
CFL2	DEG
CHD7	DEG
CHN1	DEG
CISH	DEG
CKB	DEG
CLDN11	DEG
CLEC3B	DEG
CLIP3	DEG
CNRIP1	DEG
CNTLN	DEG
COBLL1	DEG
COCH	DEG
COL1A1	DEG
COL1A2	DEG
COL5A2	DEG
COL6A3	DEG
CORO2A	DEG
CPA4	DEG
CPEB1	DEG
CPM	DEG
CPT1C	DEG
CRAT	DEG
CREG1	DEG
CRYAB	DEG
CRYL1	DEG
CSRP1	DEG
CSRP2	DEG
CTHRC1	DEG
CTRL	DEG
CTSB	DEG
CTSH	DEG
CTSK	DEG
CTTNBP2NL	DEG
CUBN	DEG
CUL4B	DEG
CYB5A	DEG
CYBRD1	DEG
CYFIP2	DEG
CYLD	DEG
CYSTM1	DEG
DAAM2	DEG
DAB2	DEG
DCBLD2	DEG
DCN	DEG
DCP1B	DEG
DCUN1D3	DEG
DDR2	DEG
DDX60L	DEG
DFNA5	DEG
DGKA	DEG
DIAPH2	DEG
DNAH14	DEG
DNAJA4	DEG
DNAJB4	DEG
DNAJC12	DEG
DNAJC13	DEG
DNAJC15	DEG
DNMBP	DEG
DNMT3B	DEG
DOCK5	DEG
DOCK7	DEG
DOPEY2	DEG
DPYSL2	DEG
DRAM1	DEG
DSEL	DEG
DSG2	DEG
DST	DEG
DTNA	DEG
DUSP10	DEG
DUSP6	DEG
EFEMP1	DEG
EFR3B	DEG
EHD2	DEG
EIF4A3	DEG
ELK3	DEG
ELL2	DEG
EMP2	DEG
ENAH	DEG
ENDOD1	DEG
ENPP1	DEG
EPCAM	DEG
EPHX2	DEG
ERAP2	DEG
EXOC6	DEG
F10	DEG
F11R	DEG
F2RL2	DEG
F3	DEG
FAF1	DEG
FAIM	DEG
FAM101B	DEG
FAM107B	DEG
FAM109B	DEG
FAM114A1	DEG
FAM117A	DEG
FAM124B	DEG
FAM184A	DEG
FAM198B	DEG
FAM40B	DEG
FAM46A	DEG
FAM69A	DEG
FAM72D	DEG
FAS	DEG
FAT1	DEG
FBLN1	DEG
FBXL5	DEG
FBXO27	DEG
FBXO36	DEG
FCGR2A	DEG
FCGRT	DEG
FERMT2	DEG
FERMT3	DEG
FGD4	DEG
FGF2	DEG
FGF5	DEG
FGFR1	DEG
FHL2	DEG
FKBP11	DEG
FKBP1B	DEG
FKBPL	DEG
FLJ42709	DEG
FLJ43681	DEG
FLT1	DEG
FMN2	DEG
FN1	DEG
FOCAD	DEG
FRS2	DEG
FUT1	DEG
FYB	DEG
FZD5	DEG
FZD7	DEG
GAB3	DEG
GABRE	DEG
GALNTL2	DEG
GAR1	DEG
GAS2L3	DEG
GBGT1	DEG
GDPD1	DEG
GJA1	DEG
GJC1	DEG
GLIPR1	DEG
GLRX	DEG
GLT25D2	DEG
GMFG	DEG
GMPR	DEG
GNB5	DEG
GNG11	DEG
GNG12	DEG
GPR1	DEG
GPR124	DEG
GPR161	DEG
GPR180	DEG
GPX1	DEG
GPX8	DEG
GRB10	DEG
GSDMD	DEG
GSN	DEG
GSTA4	DEG
GYPE	DEG
H6PD	DEG
HERC4	DEG
HHEX	DEG
HIF1A	DEG
HIPK3	DEG
HIST1H1C	DEG
HIST1H2AC	DEG
HIST1H2AG	DEG
HIST1H2AM	DEG
HIST1H2BC	DEG
HIST1H2BD	DEG
HIST1H2BG	DEG
HIST1H2BK	DEG
HIST1H3D	DEG
HIST1H3H	DEG
HIST1H4C	DEG
HIVEP2	DEG
HLA-C	DEG
HLA-E	DEG
HLA-F	DEG
HMGCS1	DEG
HOXB7	DEG
HRH1	DEG
HYAL1	DEG
IAH1	DEG
ICAM2	DEG
ICAM4	DEG
IER2	DEG
IFI16	DEG
IFI27L2	DEG
IFI30	DEG
IFI6	DEG
IFIT2	DEG
IFIT3	DEG
IFITM1	DEG
IGF1R	DEG
IGF2BP1	DEG
IGFBP4	DEG
IGFBP6	DEG
IKBKE	DEG
IKZF3	DEG
IL15	DEG
IL1R1	DEG
IL23R	DEG
IL4R	DEG
IL6ST	DEG
IMPACT	DEG
INADL	DEG
INF2	DEG
INPP5F	DEG
IQCC	DEG
IRAK3	DEG
ISYNA1	DEG
ITGA4	DEG
ITGB1	DEG
ITGB5	DEG
ITPR1	DEG
ITPRIPL2	DEG
ITSN1	DEG
IVD	DEG
JAM3	DEG
JAZF1	DEG
JUP	DEG
KANK1	DEG
KCND1	DEG
KCNE3	DEG
KCNK2	DEG
KCTD10	DEG
KDELR3	DEG
KIAA0040	DEG
KIAA1324L	DEG
KIF21A	DEG
KIFC3	DEG
KLF11	DEG
KRCC1	DEG
KRT8	DEG
LACTB	DEG
LAMA4	DEG
LAMB1	DEG
LAMB2	DEG
LDB1	DEG
LDOC1L	DEG
LGALS1	DEG
LGMN	DEG
LIMA1	DEG
LINC00263	DEG
LITAF	DEG
LMO7	DEG
LOC100129034	DEG
LOC100131096	DEG
LOC100132062	DEG
LOC100132287	DEG
LOC100216479	DEG
LOC100499466	DEG
LOC100505761	DEG
LOC100505815	DEG
LOC100506305	DEG
LOC100506394	DEG
LOC253039	DEG
LOC254128	DEG
LOC283683	DEG
LOC339803	DEG
LOC344595	DEG
LOC389641	DEG
LOC400043	DEG
LOC439990	DEG
LOC440288	DEG
LOC646719	DEG
LOC729737	DEG
LOC730091	DEG
LOC84856	DEG
LOC91948	DEG
LOC93622	DEG
LOX	DEG
LOXL2	DEG
LPAR6	DEG
LPP	DEG
LPXN	DEG
LRG1	DEG
LRP11	DEG
LRP8	DEG
LRRC8B	DEG
LSM7	DEG
LTBP1	DEG
LTBP2	DEG
LYN	DEG
LYST	DEG
LYZ	DEG
MACC1	DEG
MAGED1	DEG
MAGED2	DEG
MAGI2-AS3	DEG
MALL	DEG
MAN1A1	DEG
MAP2K3	DEG
MAPK13	DEG
MAPK9	DEG
MARCKS	DEG
MCM3AP-AS1	DEG
MCTP2	DEG
MDFIC	DEG
MEF2C	DEG
MEG3	DEG
MEIS1	DEG
MET	DEG
MGAT1	DEG
MIR17HG	DEG
MIR22HG	DEG
MIR600HG	DEG
MKRN3	DEG
MLLT3	DEG
MLLT4	DEG
MLYCD	DEG
MME	DEG
MMP19	DEG
MPP1	DEG
MSRB3	DEG
MST4	DEG
MT1E	DEG
MT2A	DEG
MTAP	DEG
MTRNR2L3	DEG
MTX3	DEG
MXD1	DEG
MXD4	DEG
MYB	DEG
MYCL1	DEG
MYL9	DEG
MYLIP	DEG
MYLK	DEG
MYLK3	DEG
MYO10	DEG
MYO1C	DEG
MYO1D	DEG
MYO5A	DEG
NADKD1	DEG
NAGK	DEG
NBPF3	DEG
NCR3LG1	DEG
NDRG2	DEG
NEDD4L	DEG
NEK6	DEG
NEXN	DEG
NFATC2	DEG
NFE2	DEG
NFIX	DEG
NFKBIZ	DEG
NID2	DEG
NINJ1	DEG
NKX3-1	DEG
NMRK1	DEG
NNMT	DEG
NOS3	DEG
NPTN	DEG
NQO1	DEG
NREP	DEG
NUDT11	DEG
NXN	DEG
NXPE3	DEG
OAS3	DEG
OPTN	DEG
OSMR	DEG
OSR2	DEG
OXTR	DEG
P4HA2	DEG
PA2G4P4	DEG
PAG1	DEG
PAK1	DEG
PAM	DEG
PAM16	DEG
PAPSS2	DEG
PARD6B	DEG
PARP11	DEG
PARVA	DEG
PCDH11Y	DEG
PCNX	DEG
PCOLCE	DEG
PCSK9	DEG
PCTP	DEG
PDE11A	DEG
PDE5A	DEG
PDIK1L	DEG
PDK2	DEG
PDLIM2	DEG
PER3	DEG
PERP	DEG
PEX6	DEG
PFN2	DEG
PGAP1	DEG
PHF10	DEG
PHF11	DEG
PHLDA1	DEG
PI4KAP2	DEG
PIK3CB	DEG
PIM1	DEG
PIM2	DEG
PIWIL4	DEG
PJA1	DEG
PKIG	DEG
PLAT	DEG
PLAUR	DEG
PLCB4	DEG
PLCD1	DEG
PLD2	DEG
PLEKHA1	DEG
PLOD2	DEG
PLXNA2	DEG
PNMAL1	DEG
PNPLA3	DEG
PPFIBP1	DEG
PPFIBP2	DEG
PPIC	DEG
PPM1H	DEG
PPP2R3A	DEG
PPP2R5A	DEG
PPP3CA	DEG
PRDM1	DEG
PRKACB	DEG
PRKAG2	DEG
PRKAR2B	DEG
PRKCA	DEG
PRKY	DEG
PRR16	DEG
PSMB8	DEG
PSMB9	DEG
PTGS1	DEG
PTK7	DEG
PTPLA	DEG
PTPN14	DEG
PTPN3	DEG
PTPN9	DEG
PTPRC	DEG
PTPRF	DEG
PTPRH	DEG
PVT1	DEG
QSOX1	DEG
RAB27A	DEG
RAB32	DEG
RAB36	DEG
RAB3B	DEG
RAI14	DEG
RASAL2	DEG
RASSF5	DEG
RASSF8	DEG
RBBP9	DEG
RBFOX2	DEG
RCAN1	DEG
RCBTB2	DEG
RCN1	DEG
RCN3	DEG
RDH10	DEG
REEP6	DEG
RELN	DEG
RFESD	DEG
RGPD5	DEG
RGS12	DEG
RGS14	DEG
RGS3	DEG
RHBDF1	DEG
RHD	DEG
RIC8B	DEG
RND2	DEG
RND3	DEG
RNF144B	DEG
RNF157	DEG
RNF168	DEG
RNFT2	DEG
RPGRIP1L	DEG
RPIA	DEG
RPP21	DEG
RPS6KA1	DEG
RPS6KA6	DEG
RPSAP52	DEG
RRAS	DEG
RRBP1	DEG
RRP7B	DEG
S100A10	DEG
S100A16	DEG
S100A4	DEG
S100A6	DEG
SASH1	DEG
SAT2	DEG
SCML2	DEG
SDC1	DEG
SDC4	DEG
SDF2L1	DEG
SEC14L2	DEG
SEC23A	DEG
SELM	DEG
SEMA3A	DEG
SEMA5A	DEG
SERINC2	DEG
SERPINE1	DEG
SERPING1	DEG
SETBP1	DEG
SETD7	DEG
SETD8	DEG
SF3A1	DEG
SFMBT2	DEG
SFXN3	DEG
SGCB	DEG
SGK1	DEG
SGMS1	DEG
SGMS2	DEG
SGSH	DEG
SH3BGRL2	DEG
SH3D19	DEG
SH3KBP1	DEG
SH3PXD2A	DEG
SHOX	DEG
SLC12A8	DEG
SLC16A4	DEG
SLC16A5	DEG
SLC16A7	DEG
SLC25A21	DEG
SLC25A23	DEG
SLC25A37	DEG
SLC27A5	DEG
SLC2A10	DEG
SLC2A6	DEG
SLC2A9	DEG
SLC35F2	DEG
SLC38A5	DEG
SLC39A13	DEG
SLC39A8	DEG
SLC40A1	DEG
SLC44A4	DEG
SLC4A7	DEG
SLC6A8	DEG
SLC7A7	DEG
SLC9A3R1	DEG
SLC9A7	DEG
SLCO4A1	DEG
SLFN5	DEG
SLIT2	DEG
SMAP2	DEG
SMARCA1	DEG
SMPD1	DEG
SMPDL3A	DEG
SMURF2	DEG
SNAPC5	DEG
SNAR-A1	DEG
SNAR-A2	DEG
SNCG	DEG
SNRPF	DEG
SOCS5	DEG
SOGA2	DEG
SOWAHC	DEG
SOX6	DEG
SPARC	DEG
SPATA13	DEG
SPATA20	DEG
SPATA6	DEG
SPIB	DEG
SPIN1	DEG
SPN	DEG
SPON2	DEG
SPTAN1	DEG
SQRDL	DEG
SRGAP1	DEG
SSH1	DEG
ST3GAL1	DEG
ST6GAL1	DEG
STAR	DEG
STARD8	DEG
STAT5A	DEG
STAT5B	DEG
STC2	DEG
STEAP2	DEG
STK10	DEG
STK40	DEG
STRBP	DEG
SULT1A1	DEG
SUSD5	DEG
SVIL	DEG
SWAP70	DEG
SYNE2	DEG
SYNPO2	DEG
TANC2	DEG
TAP1	DEG
TAX1BP3	DEG
TBC1D10A	DEG
TBC1D2	DEG
TBC1D8B	DEG
TBX3	DEG
TCAM1P	DEG
TCEAL1	DEG
TCEAL4	DEG
TCF7	DEG
TEAD1	DEG
TEC	DEG
TENC1	DEG
TGFB1I1	DEG
TGFBR2	DEG
THAP7	DEG
THBS1	DEG
THBS2	DEG
TICAM2	DEG
TIMP3	DEG
TIPARP	DEG
TLE3	DEG
TLN2	DEG
TMCO4	DEG
TMEM106A	DEG
TMEM2	DEG
TMEM220	DEG
TMEM25	DEG
TMEM30A	DEG
TMEM42	DEG
TMEM47	DEG
TMSB15A	DEG
TMTC1	DEG
TNFAIP1	DEG
TNFRSF12A	DEG
TNFRSF1B	DEG
TNFSF4	DEG
TNIK	DEG
TNNT1	DEG
TNS1	DEG
TP53I3	DEG
TP53INP1	DEG
TPM1	DEG
TPM2	DEG
TPM4	DEG
TPST1	DEG
TRABD2A	DEG
TRAM1	DEG
TRAM2	DEG
TREX1	DEG
TRIB3	DEG
TRIM16	DEG
TRIM16L	DEG
TRIM26	DEG
TRIM58	DEG
TRIOBP	DEG
TSPAN4	DEG
TSPAN5	DEG
TTC23	DEG
TTC39C	DEG
TTLL3	DEG
TTYH3	DEG
TUBA1A	DEG
TUBB1	DEG
TUBB3	DEG
TUBG2	DEG
UACA	DEG
UBAC1	DEG
UBE2C	DEG
UBL3	DEG
UGCG	DEG
UQCRH	DEG
USP2	DEG
USP20	DEG
UTRN	DEG
UTY	DEG
VAMP5	DEG
VAMP8	DEG
VDR	DEG
VEPH1	DEG
VGLL3	DEG
VIM	DEG
VSIG10	DEG
VWDE	DEG
WIPF3	DEG
WWTR1	DEG
YDJC	DEG
ZAK	DEG
ZBTB16	DEG
ZBTB4	DEG
ZC4H2	DEG
ZDBF2	DEG
ZEB1	DEG
ZFAT	DEG
ZFP36L1	DEG
ZMYND11	DEG
ZNF132	DEG
ZNF165	DEG
ZNF175	DEG
ZNF214	DEG
ZNF280B	DEG
ZNF331	DEG
ZNF334	DEG
ZNF354A	DEG
ZNF382	DEG
ZNF439	DEG
ZNF470	DEG
ZNF519	DEG
ZNF528	DEG
ZNF548	DEG
ZNF549	DEG
ZNF560	DEG
ZNF568	DEG
ZNF583	DEG
ZNF585A	DEG
ZNF585B	DEG
ZNF605	DEG
ZNF625	DEG
ZNF642	DEG
ZNF667	DEG
ZNF695	DEG
ZNF746	DEG
ZNF763	DEG
ZNF773	DEG
ZNF783	DEG
ZNF790	DEG
ZNF85	DEG
ZNF880	DEG
ZYG11A	DEG
A1BG	Not DEG
A1BG-AS1	Not DEG
AAAS	Not DEG
AACS	Not DEG
AAED1	Not DEG
AAGAB	Not DEG
AAK1	Not DEG
AAMP	Not DEG
AAR2	Not DEG
AARD	Not DEG
AARS	Not DEG
AARS2	Not DEG
AARSD1	Not DEG
AASDH	Not DEG
AASDHPPT	Not DEG
AATF	Not DEG
ABCA11P	Not DEG
ABCA5	Not DEG
ABCA8	Not DEG
ABCA9	Not DEG
ABCB1	Not DEG
ABCB10	Not DEG
ABCB5	Not DEG
ABCB6	Not DEG
ABCB7	Not DEG
ABCB8	Not DEG
ABCB9	Not DEG
ABCC1	Not DEG
ABCC10	Not DEG
ABCC13	Not DEG
ABCC4	Not DEG
ABCC5	Not DEG
ABCC9	Not DEG
ABCD3	Not DEG
ABCD4	Not DEG
ABCE1	Not DEG
ABCF1	Not DEG
ABCF2	Not DEG
ABCF3	Not DEG
ABCG2	Not DEG
ABHD10	Not DEG
ABHD11	Not DEG
ABHD12	Not DEG
ABHD13	Not DEG
ABHD14A	Not DEG
ABHD14B	Not DEG
ABHD15	Not DEG
ABHD16A	Not DEG
ABHD2	Not DEG
ABHD3	Not DEG
ABHD4	Not DEG
ABHD5	Not DEG
ABHD6	Not DEG
ABI1	Not DEG
ABI2	Not DEG
ABL1	Not DEG
ABL2	Not DEG
ABLIM1	Not DEG
ABRA	Not DEG
ABT1	Not DEG
ABTB1	Not DEG
ACAA1	Not DEG
ACAA2	Not DEG
ACACA	Not DEG
ACACB	Not DEG
ACAD10	Not DEG
ACAD8	Not DEG
ACAD9	Not DEG
ACADM	Not DEG
ACADS	Not DEG
ACADSB	Not DEG
ACADVL	Not DEG
ACAP2	Not DEG
ACAT1	Not DEG
ACAT2	Not DEG
ACBD3	Not DEG
ACBD4	Not DEG
ACBD5	Not DEG
ACBD6	Not DEG
ACBD7	Not DEG
ACCS	Not DEG
ACD	Not DEG
ACER2	Not DEG
ACER3	Not DEG
ACHE	Not DEG
ACIN1	Not DEG
ACLY	Not DEG
ACO1	Not DEG
ACO2	Not DEG
ACOT11	Not DEG
ACOT13	Not DEG
ACOT7	Not DEG
ACOT8	Not DEG
ACOT9	Not DEG
ACOX1	Not DEG
ACOX3	Not DEG
ACP1	Not DEG
ACP2	Not DEG
ACP5	Not DEG
ACP6	Not DEG
ACPL2	Not DEG
ACRBP	Not DEG
ACRC	Not DEG
ACSBG1	Not DEG
ACSF2	Not DEG
ACSF3	Not DEG
ACSL1	Not DEG
ACSL3	Not DEG
ACSL4	Not DEG
ACSL6	Not DEG
ACSS1	Not DEG
ACSS2	Not DEG
ACTB	Not DEG
ACTG1	Not DEG
ACTL6A	Not DEG
ACTL8	Not DEG
ACTN1	Not DEG
ACTN4	Not DEG
ACTR10	Not DEG
ACTR1A	Not DEG
ACTR1B	Not DEG
ACTR2	Not DEG
ACTR3	Not DEG
ACTR3B	Not DEG
ACTR3C	Not DEG
ACTR5	Not DEG
ACTR6	Not DEG
ACTR8	Not DEG
ACVR1	Not DEG
ACVR1B	Not DEG
ACVR2A	Not DEG
ACY1	Not DEG
ACYP1	Not DEG
ACYP2	Not DEG
ADA	Not DEG
ADAL	Not DEG
ADAM1	Not DEG
ADAM10	Not DEG
ADAM15	Not DEG
ADAM17	Not DEG
ADAM20P1	Not DEG
ADAMTS13	Not DEG
ADAMTS17	Not DEG
ADAMTS4	Not DEG
ADAMTSL2	Not DEG
ADAMTSL5	Not DEG
ADAR	Not DEG
ADARB1	Not DEG
ADAT1	Not DEG
ADAT2	Not DEG
ADCK1	Not DEG
ADCK2	Not DEG
ADCK3	Not DEG
ADCK4	Not DEG
ADCK5	Not DEG
ADCY10P1	Not DEG
ADCY3	Not DEG
ADCY7	Not DEG
ADCY9	Not DEG
ADD1	Not DEG
ADD3	Not DEG
ADH5	Not DEG
ADI1	Not DEG
ADIPOR1	Not DEG
ADIPOR2	Not DEG
ADK	Not DEG
ADM2	Not DEG
ADNP	Not DEG
ADNP2	Not DEG
ADO	Not DEG
ADORA2B	Not DEG
ADPGK	Not DEG
ADPRHL2	Not DEG
ADPRM	Not DEG
ADRA1A	Not DEG
ADRBK1	Not DEG
ADRBK2	Not DEG
ADRM1	Not DEG
ADSL	Not DEG
ADSS	Not DEG
ADSSL1	Not DEG
ADTRP	Not DEG
AEBP2	Not DEG
AEN	Not DEG
AES	Not DEG
AFF1	Not DEG
AFF3	Not DEG
AFF4	Not DEG
AFG3L1P	Not DEG
AFG3L2	Not DEG
AFMID	Not DEG
AFTPH	Not DEG
AGA	Not DEG
AGAP11	Not DEG
AGAP3	Not DEG
AGAP4	Not DEG
AGAP5	Not DEG
AGAP6	Not DEG
AGAP7	Not DEG
AGAP8	Not DEG
AGAP9	Not DEG
AGBL5	Not DEG
AGER	Not DEG
AGFG1	Not DEG
AGFG2	Not DEG
AGGF1	Not DEG
AGK	Not DEG
AGL	Not DEG
AGMAT	Not DEG
AGMO	Not DEG
AGPAT1	Not DEG
AGPAT2	Not DEG
AGPAT3	Not DEG
AGPAT4	Not DEG
AGPAT4-IT1	Not DEG
AGPAT5	Not DEG
AGPAT6	Not DEG
AGPHD1	Not DEG
AGPS	Not DEG
AGSK1	Not DEG
AGTPBP1	Not DEG
AGTRAP	Not DEG
AGXT2L2	Not DEG
AHCTF1	Not DEG
AHCY	Not DEG
AHCYL1	Not DEG
AHCYL2	Not DEG
AHDC1	Not DEG
AHI1	Not DEG
AHSA1	Not DEG
AHSA2	Not DEG
AIDA	Not DEG
AIFM1	Not DEG
AIFM2	Not DEG
AIG1	Not DEG
AIM1L	Not DEG
AIMP1	Not DEG
AIMP2	Not DEG
AIP	Not DEG
AIPL1	Not DEG
AIRE	Not DEG
AJUBA	Not DEG
AK1	Not DEG
AK2	Not DEG
AK3	Not DEG
AK5	Not DEG
AKAP1	Not DEG
AKAP10	Not DEG
AKAP11	Not DEG
AKAP17A	Not DEG
AKAP5	Not DEG
AKAP8	Not DEG
AKAP8L	Not DEG
AKAP9	Not DEG
AKD1	Not DEG
AKIP1	Not DEG
AKIRIN1	Not DEG
AKIRIN2	Not DEG
AKNA	Not DEG
AKR1A1	Not DEG
AKR1B10	Not DEG
AKR1C1	Not DEG
AKR1C3	Not DEG
AKR1D1	Not DEG
AKR1E2	Not DEG
AKR7A2	Not DEG
AKT1	Not DEG
AKT1S1	Not DEG
AKT2	Not DEG
AKTIP	Not DEG
ALAD	Not DEG
ALAS1	Not DEG
ALDH16A1	Not DEG
ALDH18A1	Not DEG
ALDH1B1	Not DEG
ALDH1L2	Not DEG
ALDH2	Not DEG
ALDH4A1	Not DEG
ALDH6A1	Not DEG
ALDH8A1	Not DEG
ALDH9A1	Not DEG
ALDOA	Not DEG
ALDOC	Not DEG
ALG1	Not DEG
ALG10	Not DEG
ALG10B	Not DEG
ALG11	Not DEG
ALG12	Not DEG
ALG13	Not DEG
ALG14	Not DEG
ALG2	Not DEG
ALG3	Not DEG
ALG5	Not DEG
ALG6	Not DEG
ALG8	Not DEG
ALG9	Not DEG
ALKBH1	Not DEG
ALKBH2	Not DEG
ALKBH3	Not DEG
ALKBH4	Not DEG
ALKBH5	Not DEG
ALKBH6	Not DEG
ALKBH7	Not DEG
ALKBH8	Not DEG
ALMS1	Not DEG
ALS2	Not DEG
ALS2CR8	Not DEG
ALX3	Not DEG
ALX4	Not DEG
ALYREF	Not DEG
AMACR	Not DEG
AMBRA1	Not DEG
AMD1	Not DEG
AMDHD2	Not DEG
AMFR	Not DEG
AMIGO2	Not DEG
AMIGO3	Not DEG
AMMECR1	Not DEG
AMMECR1L	Not DEG
AMN1	Not DEG
AMOTL1	Not DEG
AMPD2	Not DEG
AMPD3	Not DEG
AMPH	Not DEG
AMT	Not DEG
AMZ2	Not DEG
AMZ2P1	Not DEG
ANAPC1	Not DEG
ANAPC10	Not DEG
ANAPC11	Not DEG
ANAPC13	Not DEG
ANAPC15	Not DEG
ANAPC16	Not DEG
ANAPC4	Not DEG
ANAPC5	Not DEG
ANAPC7	Not DEG
ANGEL1	Not DEG
ANGEL2	Not DEG
ANGPT1	Not DEG
ANGPT2	Not DEG
ANKDD1A	Not DEG
ANKFY1	Not DEG
ANKH	Not DEG
ANKHD1	Not DEG
ANKHD1-EIF4EBP3	Not DEG
ANKIB1	Not DEG
ANKLE1	Not DEG
ANKLE2	Not DEG
ANKMY1	Not DEG
ANKMY2	Not DEG
ANKRA2	Not DEG
ANKRD10	Not DEG
ANKRD11	Not DEG
ANKRD12	Not DEG
ANKRD13A	Not DEG
ANKRD13C	Not DEG
ANKRD13D	Not DEG
ANKRD16	Not DEG
ANKRD17	Not DEG
ANKRD18B	Not DEG
ANKRD19P	Not DEG
ANKRD20A3	Not DEG
ANKRD20A9P	Not DEG
ANKRD23	Not DEG
ANKRD26	Not DEG
ANKRD27	Not DEG
ANKRD28	Not DEG
ANKRD30BP2	Not DEG
ANKRD32	Not DEG
ANKRD34A	Not DEG
ANKRD35	Not DEG
ANKRD36	Not DEG
ANKRD36B	Not DEG
ANKRD36BP1	Not DEG
ANKRD37	Not DEG
ANKRD39	Not DEG
ANKRD40	Not DEG
ANKRD42	Not DEG
ANKRD44	Not DEG
ANKRD45	Not DEG
ANKRD46	Not DEG
ANKRD49	Not DEG
ANKRD5	Not DEG
ANKRD50	Not DEG
ANKRD52	Not DEG
ANKRD54	Not DEG
ANKRD55	Not DEG
ANKRD65	Not DEG
ANKS1A	Not DEG
ANKS3	Not DEG
ANKS4B	Not DEG
ANKS6	Not DEG
ANKZF1	Not DEG
ANLN	Not DEG
ANO10	Not DEG
ANO6	Not DEG
ANO7	Not DEG
ANP32A	Not DEG
ANP32A-IT1	Not DEG
ANP32B	Not DEG
ANP32E	Not DEG
ANTXR2	Not DEG
ANXA1	Not DEG
ANXA11	Not DEG
ANXA2P3	Not DEG
ANXA2R	Not DEG
ANXA3	Not DEG
ANXA7	Not DEG
AP1AR	Not DEG
AP1B1	Not DEG
AP1G1	Not DEG
AP1G2	Not DEG
AP1M1	Not DEG
AP1S1	Not DEG
AP1S2	Not DEG
AP1S3	Not DEG
AP2A1	Not DEG
AP2A2	Not DEG
AP2B1	Not DEG
AP2M1	Not DEG
AP2S1	Not DEG
AP3B1	Not DEG
AP3D1	Not DEG
AP3M1	Not DEG
AP3M2	Not DEG
AP3S1	Not DEG
AP3S2	Not DEG
AP4B1	Not DEG
AP4B1-AS1	Not DEG
AP4E1	Not DEG
AP4M1	Not DEG
AP4S1	Not DEG
AP5B1	Not DEG
AP5M1	Not DEG
AP5S1	Not DEG
AP5Z1	Not DEG
APAF1	Not DEG
APBA2	Not DEG
APBA3	Not DEG
APBB3	Not DEG
APC	Not DEG
APCDD1L	Not DEG
APEH	Not DEG
APEX1	Not DEG
APEX2	Not DEG
APH1A	Not DEG
APH1B	Not DEG
API5	Not DEG
APIP	Not DEG
APITD1	Not DEG
APITD1-CORT	Not DEG
APLF	Not DEG
APLP2	Not DEG
APMAP	Not DEG
APOA1BP	Not DEG
APOBEC3B	Not DEG
APOBEC3C	Not DEG
APOBEC3F	Not DEG
APOBEC3G	Not DEG
APOD	Not DEG
APOL1	Not DEG
APOL2	Not DEG
APOL3	Not DEG
APOL4	Not DEG
APOL6	Not DEG
APOLD1	Not DEG
APOM	Not DEG
APOO	Not DEG
APOOL	Not DEG
APOPT1	Not DEG
APPBP2	Not DEG
APPL1	Not DEG
APRT	Not DEG
APTX	Not DEG
AQP11	Not DEG
AQP3	Not DEG
AQP6	Not DEG
AQPEP	Not DEG
AQR	Not DEG
ARAF	Not DEG
ARAP1	Not DEG
ARAP3	Not DEG
ARCN1	Not DEG
AREG	Not DEG
ARF1	Not DEG
ARF3	Not DEG
ARF4	Not DEG
ARF5	Not DEG
ARF6	Not DEG
ARFGAP1	Not DEG
ARFGAP2	Not DEG
ARFGAP3	Not DEG
ARFGEF1	Not DEG
ARFGEF2	Not DEG
ARFIP1	Not DEG
ARFIP2	Not DEG
ARFRP1	Not DEG
ARG2	Not DEG
ARGFX	Not DEG
ARGLU1	Not DEG
ARHGAP1	Not DEG
ARHGAP11A	Not DEG
ARHGAP11B	Not DEG
ARHGAP12	Not DEG
ARHGAP17	Not DEG
ARHGAP18	Not DEG
ARHGAP19	Not DEG
ARHGAP19-SLIT1	Not DEG
ARHGAP21	Not DEG
ARHGAP22	Not DEG
ARHGAP24	Not DEG
ARHGAP26	Not DEG
ARHGAP28	Not DEG
ARHGAP35	Not DEG
ARHGAP5	Not DEG
ARHGDIA	Not DEG
ARHGDIB	Not DEG
ARHGEF1	Not DEG
ARHGEF10	Not DEG
ARHGEF11	Not DEG
ARHGEF12	Not DEG
ARHGEF18	Not DEG
ARHGEF19	Not DEG
ARHGEF2	Not DEG
ARHGEF26	Not DEG
ARHGEF26-AS1	Not DEG
ARHGEF3	Not DEG
ARHGEF35	Not DEG
ARHGEF39	Not DEG
ARHGEF40	Not DEG
ARHGEF6	Not DEG
ARHGEF7	Not DEG
ARID1A	Not DEG
ARID1B	Not DEG
ARID2	Not DEG
ARID3A	Not DEG
ARID3B	Not DEG
ARID4A	Not DEG
ARID4B	Not DEG
ARID5A	Not DEG
ARIH1	Not DEG
ARIH2	Not DEG
ARL1	Not DEG
ARL11	Not DEG
ARL13B	Not DEG
ARL14EP	Not DEG
ARL15	Not DEG
ARL16	Not DEG
ARL17A	Not DEG
ARL17B	Not DEG
ARL2	Not DEG
ARL2BP	Not DEG
ARL3	Not DEG
ARL4C	Not DEG
ARL4D	Not DEG
ARL5A	Not DEG
ARL5B	Not DEG
ARL6	Not DEG
ARL6IP1	Not DEG
ARL6IP4	Not DEG
ARL6IP5	Not DEG
ARL6IP6	Not DEG
ARL8A	Not DEG
ARL8B	Not DEG
ARMC1	Not DEG
ARMC10	Not DEG
ARMC2	Not DEG
ARMC6	Not DEG
ARMC7	Not DEG
ARMC8	Not DEG
ARMCX3	Not DEG
ARMCX5	Not DEG
ARMCX6	Not DEG
ARNT	Not DEG
ARPC1A	Not DEG
ARPC1B	Not DEG
ARPC2	Not DEG
ARPC3	Not DEG
ARPC4	Not DEG
ARPC4-TTLL3	Not DEG
ARPC5	Not DEG
ARPC5L	Not DEG
ARPP19	Not DEG
ARRB1	Not DEG
ARRB2	Not DEG
ARRDC1	Not DEG
ARRDC2	Not DEG
ARRDC3	Not DEG
ARRDC3-AS1	Not DEG
ARRDC4	Not DEG
ARSA	Not DEG
ARSB	Not DEG
ARSG	Not DEG
ARSK	Not DEG
ARV1	Not DEG
ASAH1	Not DEG
ASAH2	Not DEG
ASAH2B	Not DEG
ASAP2	Not DEG
ASAP3	Not DEG
ASB1	Not DEG
ASB11	Not DEG
ASB13	Not DEG
ASB3	Not DEG
ASB6	Not DEG
ASB7	Not DEG
ASB8	Not DEG
ASB9	Not DEG
ASCC1	Not DEG
ASCC2	Not DEG
ASCC3	Not DEG
ASF1A	Not DEG
ASF1B	Not DEG
ASH1L	Not DEG
ASH1L-AS1	Not DEG
ASH2L	Not DEG
ASL	Not DEG
ASMTL	Not DEG
ASMTL-AS1	Not DEG
ASNA1	Not DEG
ASNS	Not DEG
ASNSD1	Not DEG
ASPHD2	Not DEG
ASPM	Not DEG
ASPSCR1	Not DEG
ASTE1	Not DEG
ASTN2	Not DEG
ASUN	Not DEG
ASXL1	Not DEG
ASXL2	Not DEG
ATAD1	Not DEG
ATAD2	Not DEG
ATAD2B	Not DEG
ATAD3A	Not DEG
ATAD3B	Not DEG
ATAD3C	Not DEG
ATAD5	Not DEG
ATAT1	Not DEG
ATCAY	Not DEG
ATE1	Not DEG
ATF1	Not DEG
ATF2	Not DEG
ATF3	Not DEG
ATF4	Not DEG
ATF5	Not DEG
ATF6	Not DEG
ATF6B	Not DEG
ATF7	Not DEG
ATF7IP	Not DEG
ATF7IP2	Not DEG
ATG10	Not DEG
ATG12	Not DEG
ATG13	Not DEG
ATG14	Not DEG
ATG16L1	Not DEG
ATG16L2	Not DEG
ATG2A	Not DEG
ATG2B	Not DEG
ATG3	Not DEG
ATG4A	Not DEG
ATG4B	Not DEG
ATG4C	Not DEG
ATG5	Not DEG
ATG7	Not DEG
ATG9A	Not DEG
ATG9B	Not DEG
ATHL1	Not DEG
ATIC	Not DEG
ATL2	Not DEG
ATL3	Not DEG
ATM	Not DEG
ATMIN	Not DEG
ATN1	Not DEG
ATOX1	Not DEG
ATP11A	Not DEG
ATP11B	Not DEG
ATP11C	Not DEG
ATP13A1	Not DEG
ATP13A2	Not DEG
ATP13A3	Not DEG
ATP1A1	Not DEG
ATP1A1OS	Not DEG
ATP1B3	Not DEG
ATP1B4	Not DEG
ATP2A2	Not DEG
ATP2A3	Not DEG
ATP2B1	Not DEG
ATP2C1	Not DEG
ATP5A1	Not DEG
ATP5B	Not DEG
ATP5C1	Not DEG
ATP5D	Not DEG
ATP5E	Not DEG
ATP5EP2	Not DEG
ATP5F1	Not DEG
ATP5G1	Not DEG
ATP5G2	Not DEG
ATP5G3	Not DEG
ATP5H	Not DEG
ATP5J	Not DEG
ATP5L	Not DEG
ATP5L2	Not DEG
ATP5O	Not DEG
ATP5S	Not DEG
ATP5SL	Not DEG
ATP6AP1	Not DEG
ATP6AP2	Not DEG
ATP6V0A1	Not DEG
ATP6V0A2	Not DEG
ATP6V0B	Not DEG
ATP6V0C	Not DEG
ATP6V0D1	Not DEG
ATP6V0E1	Not DEG
ATP6V0E2	Not DEG
ATP6V1A	Not DEG
ATP6V1B2	Not DEG
ATP6V1C1	Not DEG
ATP6V1C2	Not DEG
ATP6V1D	Not DEG
ATP6V1E1	Not DEG
ATP6V1E2	Not DEG
ATP6V1F	Not DEG
ATP6V1G1	Not DEG
ATP6V1H	Not DEG
ATP7A	Not DEG
ATP7B	Not DEG
ATP8B2	Not DEG
ATP8B3	Not DEG
ATP9B	Not DEG
ATPAF1	Not DEG
ATPAF2	Not DEG
ATPBD4	Not DEG
ATPIF1	Not DEG
ATR	Not DEG
ATRAID	Not DEG
ATRIP	Not DEG
ATRN	Not DEG
ATRX	Not DEG
ATXN1	Not DEG
ATXN1L	Not DEG
ATXN2	Not DEG
ATXN2L	Not DEG
ATXN3	Not DEG
ATXN7	Not DEG
ATXN7L1	Not DEG
ATXN7L2	Not DEG
ATXN7L3	Not DEG
ATXN7L3B	Not DEG
AUH	Not DEG
AUNIP	Not DEG
AUP1	Not DEG
AURKA	Not DEG
AURKAIP1	Not DEG
AURKB	Not DEG
AURKC	Not DEG
AVEN	Not DEG
AVL9	Not DEG
AVPR1A	Not DEG
AXIN1	Not DEG
AZI2	Not DEG
AZIN1	Not DEG
B2M	Not DEG
B3GALNT1	Not DEG
B3GALNT2	Not DEG
B3GALT2	Not DEG
B3GALT4	Not DEG
B3GALTL	Not DEG
B3GAT3	Not DEG
B3GNT1	Not DEG
B3GNT2	Not DEG
B3GNT5	Not DEG
B3GNT6	Not DEG
B3GNT7	Not DEG
B3GNTL1	Not DEG
B4GALT1	Not DEG
B4GALT2	Not DEG
B4GALT3	Not DEG
B4GALT4	Not DEG
B4GALT5	Not DEG
B4GALT7	Not DEG
B9D1	Not DEG
B9D2	Not DEG
BABAM1	Not DEG
BACH1	Not DEG
BAD	Not DEG
BAG1	Not DEG
BAG2	Not DEG
BAG3	Not DEG
BAG4	Not DEG
BAG5	Not DEG
BAG6	Not DEG
BAHD1	Not DEG
BAI3	Not DEG
BAIAP2	Not DEG
BAIAP2L1	Not DEG
BAIAP2L2	Not DEG
BAK1	Not DEG
BANF1	Not DEG
BANP	Not DEG
BAP1	Not DEG
BARD1	Not DEG
BATF2	Not DEG
BAX	Not DEG
BAZ1A	Not DEG
BAZ1B	Not DEG
BAZ2A	Not DEG
BAZ2B	Not DEG
BBIP1	Not DEG
BBS1	Not DEG
BBS10	Not DEG
BBS12	Not DEG
BBS2	Not DEG
BBS4	Not DEG
BBS5	Not DEG
BBS7	Not DEG
BBX	Not DEG
BCAP29	Not DEG
BCAP31	Not DEG
BCAR1	Not DEG
BCAR3	Not DEG
BCAS2	Not DEG
BCAS3	Not DEG
BCAS4	Not DEG
BCAT1	Not DEG
BCAT2	Not DEG
BCCIP	Not DEG
BCDIN3D	Not DEG
BCDIN3D-AS1	Not DEG
BCKDHA	Not DEG
BCKDHB	Not DEG
BCKDK	Not DEG
BCL10	Not DEG
BCL2L1	Not DEG
BCL2L12	Not DEG
BCL2L13	Not DEG
BCL2L15	Not DEG
BCL2L2	Not DEG
BCL2L2-PABPN1	Not DEG
BCL7A	Not DEG
BCL7B	Not DEG
BCL7C	Not DEG
BCL9	Not DEG
BCLAF1	Not DEG
BCOR	Not DEG
BCORL1	Not DEG
BCR	Not DEG
BCRP2	Not DEG
BCRP3	Not DEG
BCS1L	Not DEG
BDH1	Not DEG
BDH2	Not DEG
BDP1	Not DEG
BECN1	Not DEG
BEND3	Not DEG
BEST1	Not DEG
BET1	Not DEG
BET1L	Not DEG
BEX2	Not DEG
BEX4	Not DEG
BFAR	Not DEG
BHLHB9	Not DEG
BICD1	Not DEG
BICD2	Not DEG
BID	Not DEG
BIN1	Not DEG
BIN3	Not DEG
BIRC2	Not DEG
BIRC5	Not DEG
BIRC6	Not DEG
BIVM	Not DEG
BIVM-ERCC5	Not DEG
BLCAP	Not DEG
BLM	Not DEG
BLMH	Not DEG
BLOC1S1	Not DEG
BLOC1S1-RDH5	Not DEG
BLOC1S2	Not DEG
BLOC1S3	Not DEG
BLOC1S5	Not DEG
BLOC1S5-TXNDC5	Not DEG
BLOC1S6	Not DEG
BLVRA	Not DEG
BLZF1	Not DEG
BMI1	Not DEG
BMP2K	Not DEG
BMP3	Not DEG
BMP7	Not DEG
BMP8A	Not DEG
BMP8B	Not DEG
BMPR1A	Not DEG
BMS1	Not DEG
BMS1P1	Not DEG
BMS1P2	Not DEG
BMS1P4	Not DEG
BMS1P5	Not DEG
BMS1P6	Not DEG
BNIP1	Not DEG
BNIP2	Not DEG
BNIP3	Not DEG
BNIP3L	Not DEG
BNIPL	Not DEG
BOD1	Not DEG
BOD1L1	Not DEG
BOLA2	Not DEG
BOLA2B	Not DEG
BOLA3	Not DEG
BOLA3-AS1	Not DEG
BOP1	Not DEG
BORA	Not DEG
BPGM	Not DEG
BPHL	Not DEG
BPNT1	Not DEG
BPTF	Not DEG
BRAF	Not DEG
BRAP	Not DEG
BRAT1	Not DEG
BRCA1	Not DEG
BRCA2	Not DEG
BRCC3	Not DEG
BRD1	Not DEG
BRD2	Not DEG
BRD3	Not DEG
BRD4	Not DEG
BRD7	Not DEG
BRD8	Not DEG
BRD9	Not DEG
BRE	Not DEG
BRF2	Not DEG
BRI3	Not DEG
BRI3BP	Not DEG
BRIP1	Not DEG
BRIX1	Not DEG
BRK1	Not DEG
BRMS1	Not DEG
BRMS1L	Not DEG
BROX	Not DEG
BRPF1	Not DEG
BRPF3	Not DEG
BRWD1	Not DEG
BRWD3	Not DEG
BSCL2	Not DEG
BSDC1	Not DEG
BSG	Not DEG
BTAF1	Not DEG
BTBD1	Not DEG
BTBD10	Not DEG
BTBD3	Not DEG
BTBD6	Not DEG
BTBD7	Not DEG
BTBD8	Not DEG
BTBD9	Not DEG
BTD	Not DEG
BTF3	Not DEG
BTF3L4	Not DEG
BTG1	Not DEG
BTG2	Not DEG
BTG3	Not DEG
BTN2A1	Not DEG
BTN2A2	Not DEG
BTN2A3P	Not DEG
BTN3A1	Not DEG
BTRC	Not DEG
BUB1	Not DEG
BUB1B	Not DEG
BUB3	Not DEG
BUD13	Not DEG
BUD31	Not DEG
BVES	Not DEG
BYSL	Not DEG
BZW1	Not DEG
BZW2	Not DEG
C10orf10	Not DEG
C10orf107	Not DEG
C10orf118	Not DEG
C10orf12	Not DEG
C10orf137	Not DEG
C10orf2	Not DEG
C10orf25	Not DEG
C10orf32	Not DEG
C10orf35	Not DEG
C10orf88	Not DEG
C11orf1	Not DEG
C11orf10	Not DEG
C11orf24	Not DEG
C11orf30	Not DEG
C11orf31	Not DEG
C11orf34	Not DEG
C11orf48	Not DEG
C11orf49	Not DEG
C11orf52	Not DEG
C11orf54	Not DEG
C11orf57	Not DEG
C11orf58	Not DEG
C11orf63	Not DEG
C11orf65	Not DEG
C11orf67	Not DEG
C11orf68	Not DEG
C11orf71	Not DEG
C11orf73	Not DEG
C11orf74	Not DEG
C11orf75	Not DEG
C11orf80	Not DEG
C11orf82	Not DEG
C11orf83	Not DEG
C11orf91	Not DEG
C11orf95	Not DEG
C12orf23	Not DEG
C12orf26	Not DEG
C12orf29	Not DEG
C12orf32	Not DEG
C12orf35	Not DEG
C12orf4	Not DEG
C12orf43	Not DEG
C12orf44	Not DEG
C12orf45	Not DEG
C12orf49	Not DEG
C12orf51	Not DEG
C12orf52	Not DEG
C12orf57	Not DEG
C12orf59	Not DEG
C12orf60	Not DEG
C12orf61	Not DEG
C12orf65	Not DEG
C12orf66	Not DEG
C12orf76	Not DEG
C14orf1	Not DEG
C14orf101	Not DEG
C14orf102	Not DEG
C14orf118	Not DEG
C14orf119	Not DEG
C14orf126	Not DEG
C14orf129	Not DEG
C14orf142	Not DEG
C14orf149	Not DEG
C14orf159	Not DEG
C14orf166	Not DEG
C14orf169	Not DEG
C14orf182	Not DEG
C14orf2	Not DEG
C14orf28	Not DEG
C14orf43	Not DEG
C14orf45	Not DEG
C14orf79	Not DEG
C14orf80	Not DEG
C14orf93	Not DEG
C15orf23	Not DEG
C15orf29	Not DEG
C15orf37	Not DEG
C15orf39	Not DEG
C15orf40	Not DEG
C15orf41	Not DEG
C15orf44	Not DEG
C15orf57	Not DEG
C15orf61	Not DEG
C15orf63	Not DEG
C16orf13	Not DEG
C16orf46	Not DEG
C16orf48	Not DEG
C16orf52	Not DEG
C16orf53	Not DEG
C16orf57	Not DEG
C16orf58	Not DEG
C16orf59	Not DEG
C16orf62	Not DEG
C16orf70	Not DEG
C16orf72	Not DEG
C16orf79	Not DEG
C16orf80	Not DEG
C16orf87	Not DEG
C16orf88	Not DEG
C16orf91	Not DEG
C16orf93	Not DEG
C16orf95	Not DEG
C17orf101	Not DEG
C17orf103	Not DEG
C17orf104	Not DEG
C17orf108	Not DEG
C17orf49	Not DEG
C17orf51	Not DEG
C17orf53	Not DEG
C17orf58	Not DEG
C17orf61	Not DEG
C17orf61-PLSCR3	Not DEG
C17orf62	Not DEG
C17orf65	Not DEG
C17orf67	Not DEG
C17orf69	Not DEG
C17orf70	Not DEG
C17orf75	Not DEG
C17orf76-AS1	Not DEG
C17orf79	Not DEG
C17orf80	Not DEG
C17orf85	Not DEG
C18orf21	Not DEG
C18orf25	Not DEG
C18orf26	Not DEG
C18orf32	Not DEG
C18orf54	Not DEG
C18orf56	Not DEG
C18orf61	Not DEG
C18orf8	Not DEG
C19orf10	Not DEG
C19orf12	Not DEG
C19orf24	Not DEG
C19orf25	Not DEG
C19orf35	Not DEG
C19orf40	Not DEG
C19orf42	Not DEG
C19orf43	Not DEG
C19orf44	Not DEG
C19orf47	Not DEG
C19orf48	Not DEG
C19orf52	Not DEG
C19orf53	Not DEG
C19orf54	Not DEG
C19orf55	Not DEG
C19orf60	Not DEG
C19orf66	Not DEG
C19orf70	Not DEG
C19orf73	Not DEG
C1D	Not DEG
C1GALT1	Not DEG
C1GALT1C1	Not DEG
C1QBP	Not DEG
C1QTNF9B-AS1	Not DEG
C1RL	Not DEG
C1orf109	Not DEG
C1orf112	Not DEG
C1orf122	Not DEG
C1orf123	Not DEG
C1orf131	Not DEG
C1orf140	Not DEG
C1orf159	Not DEG
C1orf172	Not DEG
C1orf174	Not DEG
C1orf186	Not DEG
C1orf210	Not DEG
C1orf212	Not DEG
C1orf213	Not DEG
C1orf216	Not DEG
C1orf220	Not DEG
C1orf226	Not DEG
C1orf229	Not DEG
C1orf27	Not DEG
C1orf31	Not DEG
C1orf35	Not DEG
C1orf43	Not DEG
C1orf50	Not DEG
C1orf52	Not DEG
C1orf53	Not DEG
C1orf54	Not DEG
C1orf56	Not DEG
C1orf63	Not DEG
C1orf74	Not DEG
C1orf85	Not DEG
C1orf86	Not DEG
C20orf111	Not DEG
C20orf112	Not DEG
C20orf194	Not DEG
C20orf196	Not DEG
C20orf20	Not DEG
C20orf24	Not DEG
C20orf27	Not DEG
C20orf43	Not DEG
C20orf72	Not DEG
C20orf94	Not DEG
C20orf96	Not DEG
[truncated: 9,650 more rows]
