# Supplementary material for: Modeling expression ranks for noise-tolerant differential expression analysis of scRNA-seq data
Source: HighWire-hosted journal article supplement (doi:10.1101/gr.267070.120), 2021-03-05
Supplement: Supplemental_Table_S10.xlsx [file Supplemental_Table_S10.xlsx]

## Sheet: AUC, MCC, Kappa, F1
Supplemental Table S10: Performance (metrics: AUC, MCC, F1 and Kappa) of the DEG callers on various benchmarking datasets.
				BPSE	DESeq2	MAST	ROSeq	SCDE	Wilcoxon
Trapnell	T0	T24	AUC	0.76	0.68	0.72	0.81	0.77	0.73
			MCC	0.145238	0.162888	0.112982	0.21958	0.214773	0.116273
			F1	0.109331	0.154545	0.0921144	0.169166	0.175893	0.0892495
			Kappa	0.0684091	0.119942	0.0500855	0.132726	0.140565	0.0466519
Tung	NA19098	NA19101	AUC	0.91	0.91	0.92	0.91	0.93	0.92
			MCC	0.159139	0.103925	0.148756	0.219282	0.199979	0.155893
			F1	0.0643432	0.0402235	0.0531697	0.105906	0.08981	0.0577137
			Kappa	0.0597887	0.03552	0.0485165	0.101646	0.0854315	0.0530949
	NA19101	NA19239	AUC	0.95	0.89	0.97	0.97	0.98	0.95
			MCC	0.15153	0.0979504	0.201638	0.3157	0.188725	0.156639
			F1	0.0566524	0.0297934	0.0929577	0.203704	0.0765143	0.0599455
			Kappa	0.0506816	0.0235634	0.0873382	0.199095	0.0707153	0.054007
	NA19098	NA19239	AUC	0.97	0.86	0.98	0.99	0.98	0.97
			MCC	0.161748	0.0800082	0.215578	0.238588	0.241175	0.185129
			F1	0.0576247	0.0239826	0.0972053	0.116279	0.118519	0.0761719
			Kappa	0.0509906	0.0170124	0.0909882	0.110256	0.112518	0.069744
Chu	H1	H9	AUC	0.72	0.65	0.77	0.93	0.78	0.77
			MCC	0.0586511	0.0615724	0.059648	0.158355	0.0983111	0.0554275
			F1	0.0224431	0.0262009	0.0195947	0.0671937	0.0416432	0.0185105
			Kappa	0.0147674	0.0186113	0.0118486	0.0600273	0.0342345	0.0107522
	H9	NPCs	AUC	0.74	0.71	0.76	0.83	0.8	0.74
			MCC	0.184666	0.263317	0.194567	0.342729	0.317336	0.200333
			F1	0.232111	0.316358	0.236448	0.364179	0.344335	0.255733
			Kappa	0.123149	0.236205	0.127455	0.28341	0.260603	0.15802
	H1	NPCs	AUC	0.73	0.7	0.75	0.83	0.79	0.74
			MCC	0.182784	0.229449	0.210133	0.343543	0.302017	0.194426
			F1	0.23482	0.287547	0.261592	0.367221	0.333927	0.253598
			Kappa	0.122094	0.196149	0.15816	0.283614	0.244691	0.150736
Gupta	BJ	K562	AUC	0.79	0.8	0.82	0.88	0.78	0.84
			MCC	0.243562	0.261294	0.311174	0.41964	0.239625	0.3115
			F1	0.260692	0.277999	0.319743	0.43005	0.262401	0.31574
			Kappa	0.160874	0.182469	0.2324	0.364278	0.164062	0.226802
			Average AUC	0.82125	0.775	0.83625	0.89375	0.85125	0.8325
			Average MCC	0.160915	0.157551	0.181809	0.282177	0.225242	0.171952
			Average F1	0.129752	0.144581	0.146603	0.227962	0.18038	0.140833
			Average Kappa	0.0813443	0.103684	0.100849	0.191882	0.139103	0.0962259
