# Supplementary material for: Modeling expression ranks for noise-tolerant differential expression analysis of scRNA-seq data
Source: HighWire-hosted journal article supplement (doi:10.1101/gr.267070.120), 2021-03-05
Supplement: Supplemental_Table_S11.xlsx [file Supplemental_Table_S11.xlsx]

## Sheet: Optimal value of K
Supplemental Table S11: ROSeq’s performance (AUC, MCC, F1 and Kappa) on Gupta dataset, with values of k ranging from 0.01 to 0.5.
Gupta; BJ, K562	K=.01	K=.05	K=.1	K=.2	K=.5
AUC	0.73	0.88	0.88	0.86	0.8
MCC	0.30936	0.41964	0.381567	0.380785	0.289127
F1	0.350073	0.43005	0.382187	0.388822	0.306041
Kappa	0.277948	0.364278	0.306099	0.315257	0.217204
